# Supplementary material for: Efficient and Easy Conversion of Human iPSCs into Functional Induced Microglia-like Cells
Source: Int J Mol Sci. 2022 Apr 20;23(9):4526. doi: 10.3390/ijms23094526 (PMC9105476; doi:10.3390/ijms23094526)
Supplement: Supplementary file 1 [file ijms-23-04526-s001.zip › Table_S1_RNAseq_NTvsLPS.xlsx]

## Sheet: Table-S1-A_counts
Geneid	33Q101-LPS	33Q101-UT	33Q6-LPS	33Q6-UT	82A17-LPS	82A17-UT	82A2-LPS	82A2-UT
ENSG00000223972	0	0	0	0	0	0	0	0
ENSG00000227232	155	118	152	98	157	236	164	287
ENSG00000278267	16	10	9	29	28	30	16	24
ENSG00000243485	0	1	0	10	0	0	0	8
ENSG00000284332	0	0	0	0	0	0	0	0
ENSG00000237613	0	0	0	0	0	0	0	0
ENSG00000268020	0	0	0	0	0	0	0	0
ENSG00000240361	0	0	0	0	0	0	0	0
ENSG00000186092	0	0	0	0	0	0	0	0
ENSG00000238009	0	2	0	0	0	0	4	4
ENSG00000239945	0	0	0	0	0	0	0	0
ENSG00000233750	0	4	0	0	12	20	0	2
ENSG00000268903	52	29	64	8	159	149	182	92
ENSG00000269981	42	10	134	45	142	162	218	110
ENSG00000239906	0	0	0	0	0	0	3	2
ENSG00000241860	24	8	55	8	47	21	131	35
ENSG00000222623	0	0	0	1	2	2	0	0
ENSG00000241599	0	0	1	0	2	0	0	0
ENSG00000279928	0	2	0	0	0	0	0	0
ENSG00000279457	185	172	217	176	151	176	269	168
ENSG00000273874	0	2	0	1	1	1	2	0
ENSG00000228463	5	14	13	5	6	3	0	1
ENSG00000241670	0	0	0	0	0	0	0	0
ENSG00000236679	0	0	0	0	0	5	1	1
ENSG00000236743	0	0	0	0	0	0	0	0
ENSG00000236601	0	0	0	0	0	0	0	0
ENSG00000237094	36	25	10	26	15	16	40	59
ENSG00000269732	0	0	0	0	0	0	0	0
ENSG00000278566	0	0	0	0	0	0	0	0
ENSG00000224813	0	0	0	0	0	0	0	0
ENSG00000233653	0	0	0	0	0	0	0	0
ENSG00000250575	2	6	3	3	0	2	2	7
ENSG00000278757	0	0	3	1	1	2	4	3
ENSG00000230021	0	0	2	1	0	2	0	0
ENSG00000235146	0	0	0	0	0	0	0	0
ENSG00000225972	32	56	76	74	72	50	140	54
ENSG00000225630	156	187	144	210	110	204	128	265
ENSG00000237973	1801	2319	1504	1667	1626	1995	3007	2140
ENSG00000278791	0	0	0	0	0	0	0	0
ENSG00000229344	104	280	244	198	138	162	222	201
ENSG00000240409	0	1	0	2	0	3	1	2
ENSG00000248527	3722	6346	4280	5907	4019	7051	6500	7014
ENSG00000198744	60	148	38	90	118	264	246	244
ENSG00000268663	0	0	0	0	0	0	0	0
ENSG00000273547	0	0	0	0	0	0	0	0
ENSG00000283574	0	0	0	0	0	0	0	0
ENSG00000229376	0	10	4	2	0	6	4	2
ENSG00000228327	130	66	184	185	157	212	366	203
ENSG00000223181	0	0	0	0	0	0	0	0
ENSG00000229905	0	0	0	0	0	0	0	0
ENSG00000237491	20	14	60	25	31	76	60	54
ENSG00000230092	5	12	11	30	28	12	21	24
ENSG00000177757	14	31	12	20	12	4	11	24
ENSG00000228794	410	794	297	735	291	673	398	823
ENSG00000225880	22	28	14	26	8	33	6	26
ENSG00000230368	0	0	0	0	0	6	0	0
ENSG00000234711	0	0	0	0	0	0	0	0
ENSG00000283040	0	0	0	0	0	0	0	0
ENSG00000272438	0	0	0	0	0	0	2	0
ENSG00000230699	0	0	0	0	0	12	41	1
ENSG00000241180	0	0	0	0	0	0	0	0
ENSG00000223764	0	0	0	1	4	30	6	12
ENSG00000187634	0	0	0	3	0	14	2	16
ENSG00000188976	1834	2684	1459	2374	1548	2835	1978	2556
ENSG00000187961	184	133	271	116	234	362	413	349
ENSG00000187583	26	13	52	10	37	56	62	37
ENSG00000187642	0	1	4	10	26	9	14	17
ENSG00000272512	0	0	0	0	4	0	0	0
ENSG00000188290	60	0	2	4	47	38	12	18
ENSG00000187608	14983	328	9564	548	6563	1130	5084	1052
ENSG00000231702	0	0	1	0	0	0	0	0
ENSG00000224969	0	0	0	0	0	0	0	0
ENSG00000188157	6703	900	6222	689	6476	4054	10131	3097
ENSG00000242590	0	0	0	0	0	0	0	0
ENSG00000217801	368	3	219	2	238	95	605	54
ENSG00000273443	48	0	47	0	39	7	95	9
ENSG00000237330	0	0	0	0	0	0	0	0
ENSG00000131591	380	278	470	204	172	408	383	280
ENSG00000223823	0	0	0	0	0	0	0	0
ENSG00000207730	0	0	0	0	0	0	0	0
ENSG00000207607	0	0	0	0	0	0	0	0
ENSG00000198976	0	0	0	0	0	0	0	0
ENSG00000272141	0	0	0	0	0	0	0	0
ENSG00000205231	0	0	0	0	0	0	0	0
ENSG00000162571	0	0	4	0	0	0	0	0
ENSG00000186891	347	34	316	21	102	122	122	80
ENSG00000186827	679	68	771	31	68	155	193	87
ENSG00000078808	8620	6786	6493	6850	7138	7576	8904	7780
ENSG00000176022	1004	1118	610	1044	589	868	908	1120
ENSG00000184163	3	20	5	28	4	12	25	6
ENSG00000260179	0	0	12	6	6	0	10	0
ENSG00000160087	2159	1974	1500	2049	1542	1752	2129	1852
ENSG00000230415	5	6	2	6	10	28	6	0
ENSG00000162572	20	16	26	17	10	20	23	46
ENSG00000131584	568	775	684	910	690	1385	840	951
ENSG00000278073	0	0	0	0	0	0	0	0
ENSG00000169972	237	419	260	356	171	391	308	431
ENSG00000127054	1423	1843	1674	1836	1335	1933	1868	1980
ENSG00000283712	0	0	0	0	0	0	0	0
ENSG00000240731	17	17	40	35	18	33	46	37
ENSG00000224051	654	834	516	778	667	928	932	726
ENSG00000169962	4	9	28	2	12	52	19	10
ENSG00000107404	820	899	686	772	876	1488	1191	1211
ENSG00000284372	0	0	0	0	0	0	0	0
ENSG00000162576	10	66	81	142	113	364	101	210
ENSG00000175756	2404	2768	1542	2634	1890	2304	2536	2272
ENSG00000223663	0	0	6	0	1	0	0	0
ENSG00000221978	1664	1515	2413	2818	1627	3170	3012	2903
ENSG00000224870	542	891	513	729	348	418	448	586
ENSG00000242485	1001	1688	900	1590	713	1343	1125	1282
ENSG00000264293	0	0	0	0	0	0	0	0
ENSG00000272455	12	22	14	18	26	40	64	24
ENSG00000235098	8	0	0	0	0	0	0	0
ENSG00000225905	0	0	0	0	0	0	0	0
ENSG00000205116	0	0	0	0	0	0	0	0
ENSG00000225285	0	0	0	6	6	8	29	2
ENSG00000179403	52	266	18	164	347	318	560	331
ENSG00000215915	0	5	0	0	0	0	2	1
ENSG00000160072	681	945	618	1229	529	1388	856	1310
ENSG00000197785	502	1420	494	1249	449	1096	607	1188
ENSG00000205090	8	2	0	10	4	2	22	0
ENSG00000160075	3276	3353	2304	2687	2008	2754	3149	3063
ENSG00000215014	42	32	34	40	62	50	134	72
ENSG00000274481	0	0	0	0	0	0	0	0
ENSG00000228594	144	496	154	380	166	342	210	414
ENSG00000272106	68	68	101	50	79	61	98	70
ENSG00000197530	616	909	553	600	659	786	926	599
ENSG00000189409	0	0	0	1	0	2	0	0
ENSG00000248333	1760	1477	1696	1260	1051	1091	1406	1002
ENSG00000272004	1	8	14	0	0	4	7	0
ENSG00000189339	1650	1703	1880	1907	1296	1913	2331	1687
ENSG00000269737	24	15	34	28	56	34	76	29
ENSG00000215914	2	0	0	5	7	0	6	4
ENSG00000008128	19	18	28	16	24	32	68	40
ENSG00000268575	31	7	21	26	38	63	52	57
ENSG00000227775	173	138	128	186	235	347	344	296
ENSG00000215790	134	77	153	125	95	155	200	160
ENSG00000008130	11157	5530	11761	5263	5809	4714	8119	3832
ENSG00000078369	22171	17485	17593	16457	14157	17141	20060	18587
ENSG00000231050	2	14	2	6	4	8	0	8
ENSG00000169885	0	0	0	0	0	0	5	2
ENSG00000178821	0	4	0	0	0	0	8	4
ENSG00000142609	2	0	0	0	0	2	0	0
ENSG00000233542	0	0	0	0	0	0	0	0
ENSG00000187730	0	0	0	0	0	0	0	0
ENSG00000226969	0	0	0	0	0	0	0	0
ENSG00000067606	23	55	6	23	32	17	20	40
ENSG00000271806	0	0	0	0	0	0	0	0
ENSG00000182873	16	0	0	0	39	10	6	9
ENSG00000162585	649	1050	614	875	561	806	866	817
ENSG00000234396	0	0	0	8	0	0	0	0
ENSG00000157933	3670	11130	3800	12282	3429	6624	4900	8490
ENSG00000116151	80	88	108	128	69	96	70	83
ENSG00000272161	0	0	0	0	0	0	0	0
ENSG00000269896	10	18	8	16	12	4	15	4
ENSG00000272420	0	0	2	0	0	2	0	0
ENSG00000157916	4274	4081	3663	3596	3028	3837	4397	3889
ENSG00000157911	218	357	181	318	171	310	400	395
ENSG00000149527	6	4	15	31	0	35	18	29
ENSG00000224387	0	0	0	0	0	5	0	0
ENSG00000229393	0	0	0	6	0	0	0	0
ENSG00000157881	1019	724	906	925	905	1010	1001	961
ENSG00000197921	0	0	0	0	0	0	0	0
ENSG00000272449	30	26	48	16	10	40	20	24
ENSG00000238164	27	48	37	30	72	86	64	97
ENSG00000157873	1666	2481	1738	1776	2071	2910	2627	2910
ENSG00000225931	21	18	27	2	18	20	11	12
ENSG00000228037	16	3	0	18	4	4	8	2
ENSG00000157870	1161	1396	868	1035	1204	1997	1208	1473
ENSG00000142606	0	0	0	0	0	0	16	0
ENSG00000237058	0	0	0	0	0	0	0	0
ENSG00000215912	2	14	18	2	32	22	14	28
ENSG00000283259	0	0	0	0	0	0	0	0
ENSG00000233234	0	0	0	0	0	0	0	0
ENSG00000231630	0	0	0	0	0	0	0	0
ENSG00000169717	0	0	0	0	0	0	0	0
ENSG00000177133	0	0	0	0	0	0	0	0
ENSG00000142611	4	0	0	0	0	4	0	0
ENSG00000283572	0	0	0	0	0	0	0	0
ENSG00000226286	0	0	0	0	0	0	0	0
ENSG00000279839	0	0	0	0	0	0	0	0
ENSG00000272235	0	0	0	0	0	0	0	0
ENSG00000130762	0	26	10	74	54	159	142	76
ENSG00000272088	0	0	0	0	0	0	0	0
ENSG00000162591	0	11	30	12	263	1087	509	352
ENSG00000207776	0	0	0	0	0	0	0	0
ENSG00000238260	2	0	0	5	2	12	10	2
ENSG00000158109	2409	2996	1999	2992	1626	2372	2527	2550
ENSG00000116213	485	338	528	391	414	473	659	564
ENSG00000078900	0	8	12	8	2	19	12	28
ENSG00000227589	0	0	0	0	0	0	0	0
ENSG00000235131	0	0	0	0	0	0	0	0
ENSG00000227372	723	562	770	769	611	632	870	700
ENSG00000276189	0	0	0	0	0	0	0	0
ENSG00000162592	0	0	2	0	0	0	0	0
ENSG00000235169	12	51	18	17	8	45	42	35
ENSG00000130764	1499	1427	1235	1438	925	1345	1252	1420
ENSG00000266075	0	2	4	2	0	2	0	0
ENSG00000272153	10	36	31	27	8	33	41	32
ENSG00000116198	1330	1209	1349	1033	1059	1361	1400	1722
ENSG00000169598	153	260	298	347	133	198	257	249
ENSG00000198912	466	671	553	604	479	812	528	893
ENSG00000236423	93	39	41	82	49	66	74	38
ENSG00000233304	0	0	0	0	0	0	0	0
ENSG00000226374	0	0	0	0	0	0	0	0
ENSG00000229280	0	0	0	0	0	0	0	0
ENSG00000235054	0	0	0	0	0	0	0	0
ENSG00000227169	0	0	0	0	0	0	0	0
ENSG00000232596	0	0	0	0	0	0	0	0
ENSG00000196581	44	4	2	0	14	32	6	4
ENSG00000231510	0	0	0	0	0	0	0	0
ENSG00000260972	0	0	0	0	0	0	0	0
ENSG00000283356	0	0	0	0	0	0	0	0
ENSG00000236948	0	0	0	0	0	0	0	0
ENSG00000264341	0	0	0	0	0	0	0	0
ENSG00000264101	0	0	0	0	0	0	0	0
ENSG00000131697	378	457	494	451	391	699	631	680
ENSG00000069424	3611	18289	3711	17452	3029	12959	3802	14247
ENSG00000116254	6	2	0	6	0	9	15	0
ENSG00000116251	2188	9008	1784	8035	2040	5911	3438	5560
ENSG00000226944	0	0	5	0	10	0	0	14
ENSG00000158286	76	12	272	4	246	780	429	316
ENSG00000116237	2139	2809	1832	2467	1594	3533	2135	3423
ENSG00000225077	9	12	10	0	32	38	20	3
ENSG00000173673	0	0	0	0	0	0	0	0
ENSG00000158292	41	28	56	60	129	201	105	158
ENSG00000097021	302	372	214	312	369	760	553	550
ENSG00000271746	0	0	0	0	0	0	0	0
ENSG00000069812	8	0	0	0	7	62	6	36
ENSG00000187017	0	63	2	75	0	19	0	17
ENSG00000265392	0	0	0	0	0	0	0	0
ENSG00000231868	0	1	0	0	0	0	0	0
ENSG00000215788	124	1894	241	2026	79	1295	61	1290
ENSG00000171680	625	10787	836	11243	235	5855	318	6739
ENSG00000162408	682	1021	600	1209	335	908	729	974
ENSG00000253022	6	6	2	0	0	1	0	0
ENSG00000229519	3	8	10	10	4	16	35	20
ENSG00000173662	0	0	0	0	1	0	2	8
ENSG00000204859	1576	1462	1621	1540	1538	1680	1933	1948
ENSG00000162413	1640	2993	1594	2343	2009	2789	2296	2458
ENSG00000116273	674	445	771	456	723	656	888	520
ENSG00000041988	345	452	299	301	302	234	337	347
ENSG00000007923	886	1770	896	1772	983	1924	1187	1838
ENSG00000228750	0	0	0	0	0	0	0	0
ENSG00000237436	0	4	0	0	0	0	0	2
ENSG00000171735	985	1378	734	893	764	825	1154	860
ENSG00000227950	0	0	0	0	4	0	0	0
ENSG00000237365	0	0	0	0	0	0	0	0
ENSG00000207056	0	0	0	0	0	0	0	0
ENSG00000237402	0	0	0	0	0	0	0	0
ENSG00000237728	0	0	0	0	0	0	0	0
ENSG00000225126	0	0	0	0	0	0	0	0
ENSG00000270171	0	0	0	0	0	0	0	0
ENSG00000270035	0	0	0	0	0	0	0	0
ENSG00000269978	0	0	0	0	0	0	0	0
ENSG00000049245	2980	3001	3656	3770	2737	3439	3602	3811
ENSG00000269925	7	4	34	25	8	40	13	48
ENSG00000049246	113	817	99	755	64	1026	75	883
ENSG00000236266	0	2	0	1	0	6	0	6
ENSG00000049247	0	2	0	0	10	38	0	0
ENSG00000049249	4491	228	2487	105	1403	1706	2106	764
ENSG00000270330	0	0	8	0	0	0	0	8
ENSG00000116288	4388	7930	2616	6369	2299	4884	3508	4849
ENSG00000200344	0	0	0	0	0	0	1	0
ENSG00000116285	489	726	312	474	298	1249	459	1372
ENSG00000238290	0	0	0	0	0	0	0	0
ENSG00000232848	0	0	0	0	0	0	0	0
ENSG00000229305	0	0	0	0	0	0	0	0
ENSG00000227634	0	0	0	0	0	0	0	0
ENSG00000200975	0	0	0	0	0	0	0	0
ENSG00000233645	0	0	0	0	0	0	0	0
ENSG00000251977	0	0	0	0	0	0	0	0
ENSG00000162426	0	6	6	2	10	31	4	12
ENSG00000252254	0	0	0	0	0	0	0	0
ENSG00000142599	1967	3371	2259	3355	1151	2332	1707	2823
ENSG00000232912	3	0	6	14	24	4	0	3
ENSG00000221083	0	3	0	2	0	0	0	0
ENSG00000270282	0	4	0	0	0	0	0	0
ENSG00000234619	0	0	4	2	0	0	0	4
ENSG00000224315	0	0	0	6	0	1	6	0
ENSG00000222511	0	0	4	2	1	0	0	8
ENSG00000226545	0	0	0	0	0	2	5	0
ENSG00000228423	0	0	0	2	10	4	0	0
ENSG00000229716	0	0	0	0	0	0	0	0
ENSG00000074800	45882	57398	23628	44196	35960	45842	56774	45833
ENSG00000274258	0	0	2	0	0	0	0	0
ENSG00000236269	6	1	12	14	6	11	17	4
ENSG00000230679	0	4	0	0	0	0	0	0
ENSG00000201725	0	0	0	0	0	0	0	0
ENSG00000238249	4	0	0	2	0	0	14	2
ENSG00000232208	0	0	0	0	0	2	0	0
ENSG00000232663	0	0	0	0	0	0	0	0
ENSG00000131686	0	0	0	0	0	0	0	0
ENSG00000265141	0	0	0	0	0	0	0	0
ENSG00000197241	0	0	0	0	0	0	0	0
ENSG00000142583	14	134	19	647	92	523	605	132
ENSG00000252404	0	0	0	0	0	0	0	0
ENSG00000180758	1502	252	976	304	727	394	912	333
ENSG00000228526	307	248	636	473	348	550	522	507
ENSG00000284357	0	0	0	0	0	0	0	0
ENSG00000234546	14	12	9	20	20	12	8	18
ENSG00000281937	0	0	0	0	2	20	0	2
ENSG00000049239	3749	2258	3474	1988	5797	3191	8926	2979
ENSG00000171621	701	282	482	124	1076	794	679	474
ENSG00000252956	0	0	0	0	0	0	0	0
ENSG00000235263	0	0	0	0	0	0	0	0
ENSG00000171612	719	573	504	425	538	702	539	730
ENSG00000231181	33	21	35	4	0	9	12	20
ENSG00000188807	84	425	173	384	179	507	204	440
ENSG00000171608	6313	5544	6038	4794	4250	4748	6279	5050
ENSG00000179840	63	12	64	42	10	30	24	20
ENSG00000233268	15	0	4	6	4	2	2	1
ENSG00000231789	0	21	8	22	16	4	41	12
ENSG00000171603	3903	5240	3369	4513	1467	1879	2236	2214
ENSG00000271264	0	0	0	2	0	0	0	0
ENSG00000280113	0	0	0	0	0	0	0	0
ENSG00000178585	269	838	170	741	295	697	383	828
ENSG00000223989	0	0	0	0	0	0	0	0
ENSG00000162441	503	1012	491	879	343	1003	541	853
ENSG00000228150	9	18	18	12	17	7	19	13
ENSG00000173614	977	1228	768	1122	734	936	900	879
ENSG00000202415	6	2	26	6	0	1	8	0
ENSG00000283611	0	12	17	2	2	16	8	0
ENSG00000265521	1	0	4	2	0	0	0	0
ENSG00000241326	0	0	0	0	0	0	0	0
ENSG00000162444	0	330	29	896	0	80	10	106
ENSG00000130939	2151	2867	2165	3057	1458	2577	2497	2929
ENSG00000224340	0	0	0	0	2	3	0	0
ENSG00000233623	2	8	0	0	0	0	0	0
ENSG00000201746	0	0	0	0	0	0	0	0
ENSG00000054523	6803	3563	7361	4394	4519	6372	6409	6596
ENSG00000264881	0	0	0	0	0	0	8	0
ENSG00000199562	0	0	3	1	0	0	2	5
ENSG00000264501	0	0	0	0	0	0	0	0
ENSG00000142657	77350	33720	46916	24996	36812	24574	50072	27333
ENSG00000271989	0	2	0	0	4	0	1	0
ENSG00000251503	0	2	4	0	0	0	6	12
ENSG00000175279	21	5	12	12	9	13	20	10
ENSG00000241563	8	12	4	8	2	8	13	0
ENSG00000160049	1286	1994	949	1732	756	1763	1157	1702
ENSG00000203469	0	0	0	0	0	0	0	0
ENSG00000142655	1446	1450	1055	1213	1047	1011	1416	1114
ENSG00000243267	0	0	0	2	0	6	8	0
ENSG00000130940	169	16	108	6	100	37	61	41
ENSG00000272078	8	0	8	2	20	6	8	0
ENSG00000225158	0	0	0	0	0	0	0	0
ENSG00000175262	40	475	89	502	36	248	34	201
ENSG00000215785	0	8	0	0	0	0	0	0
ENSG00000120948	2206	1976	2020	2123	1252	2512	1858	2579
ENSG00000277726	0	0	0	0	0	0	0	0
ENSG00000009724	8	18	43	54	22	76	44	103
ENSG00000271895	8	8	14	26	5	25	16	12
ENSG00000116649	282	1072	171	904	474	1204	624	1328
ENSG00000171824	1948	1445	1890	1394	992	1466	1732	1733
ENSG00000226849	1	3	0	5	0	4	0	1
ENSG00000230337	8	7	4	9	12	10	4	0
ENSG00000198793	3796	4047	3747	4025	2415	3889	3934	3663
ENSG00000225602	0	0	0	0	4	0	0	2
ENSG00000253086	0	0	0	0	0	0	0	0
ENSG00000171819	14	0	14	12	0	1	10	13
ENSG00000207451	0	0	0	0	0	0	0	0
ENSG00000238173	0	0	0	0	2	0	2	0
ENSG00000120942	639	892	566	823	480	803	490	695
ENSG00000238199	0	0	26	6	0	0	0	2
ENSG00000224338	0	0	0	0	0	0	0	0
ENSG00000204624	0	0	0	0	0	8	0	0
ENSG00000235643	0	0	0	0	0	0	0	0
ENSG00000116661	222	4	60	2	55	30	121	6
ENSG00000132879	783	348	565	282	237	236	503	196
ENSG00000116663	3605	480	2662	277	1474	443	1641	352
ENSG00000116670	1732	490	963	284	710	482	1191	398
ENSG00000162490	6	0	0	0	100	118	134	52
ENSG00000177674	2373	1196	2334	708	2526	1294	3124	1003
ENSG00000215910	0	0	0	0	0	0	0	0
ENSG00000177553	0	0	0	0	0	0	0	0
ENSG00000177000	1968	2384	1907	2358	1543	1894	2202	2136
ENSG00000011021	900	761	793	888	580	1037	974	1127
ENSG00000242349	0	4	5	5	1	10	2	2
ENSG00000276470	0	0	0	0	0	0	0	0
ENSG00000278852	0	0	0	0	0	0	0	0
ENSG00000175206	8	8	2	1	0	2	4	12
ENSG00000275915	0	0	0	0	0	0	0	0
ENSG00000120937	0	0	0	52	8	298	0	26
ENSG00000224904	0	0	0	0	0	0	0	0
ENSG00000199347	0	0	1	4	0	0	0	0
ENSG00000201801	2	0	0	0	3	2	0	0
ENSG00000116685	2843	2821	2114	2678	2191	2931	3115	3040
ENSG00000083444	4886	6652	4767	7248	4311	7469	5571	7349
ENSG00000116688	5776	9905	5072	8320	4870	8986	6310	8153
ENSG00000270914	0	0	0	0	0	0	0	0
ENSG00000116691	1020	1113	1115	1412	844	949	1133	1045
ENSG00000202461	0	3	12	23	0	8	14	1
ENSG00000276869	0	0	0	0	0	0	0	0
ENSG00000243539	0	0	0	0	0	0	0	0
ENSG00000120949	334	256	264	322	354	142	617	116
ENSG00000201135	0	0	0	0	0	0	0	0
ENSG00000227875	0	0	0	0	0	0	0	0
ENSG00000283789	0	0	0	0	0	0	0	0
ENSG00000028137	35649	17922	20241	13319	59900	12358	110833	15454
ENSG00000263676	4	2	1	0	2	2	11	0
ENSG00000225196	0	0	0	0	0	0	0	0
ENSG00000252969	0	0	0	0	0	0	0	0
ENSG00000048707	3482	3773	4058	4527	2403	4037	3283	4409
ENSG00000239149	0	2	6	3	0	7	10	4
ENSG00000229484	0	14	2	2	0	4	4	4
ENSG00000162496	1068	1700	1556	3341	1253	1783	1435	1545
ENSG00000221340	0	6	0	2	0	0	12	7
ENSG00000276830	0	0	4	2	0	0	1	5
ENSG00000272482	17	21	49	53	26	39	24	4
ENSG00000204518	0	0	0	1	0	0	0	0
ENSG00000226166	0	0	0	0	0	0	0	0
ENSG00000188984	0	0	0	0	0	0	0	0
ENSG00000157330	0	0	0	0	0	0	0	0
ENSG00000116726	0	0	0	0	0	0	0	0
ENSG00000116721	0	0	0	0	0	0	0	0
ENSG00000228338	0	0	0	0	0	0	0	0
ENSG00000239810	0	0	0	0	0	0	0	0
ENSG00000231103	0	0	0	0	0	0	0	0
ENSG00000179172	0	28	3	1	0	0	12	0
ENSG00000120952	0	0	0	0	0	0	0	0
ENSG00000243073	0	0	0	0	0	3	0	0
ENSG00000187545	0	0	0	0	0	0	0	0
ENSG00000204510	0	0	0	0	0	0	0	0
ENSG00000207434	0	0	0	0	0	0	0	0
ENSG00000234064	0	0	0	0	0	0	0	0
ENSG00000232423	0	0	0	0	0	0	0	0
ENSG00000274178	0	0	0	0	0	0	0	0
ENSG00000274764	0	0	0	0	0	0	0	0
ENSG00000277058	0	0	0	0	0	0	0	0
ENSG00000229571	0	0	0	0	0	0	0	0
ENSG00000277862	0	0	0	0	0	0	0	0
ENSG00000236179	0	0	0	0	0	0	0	0
ENSG00000275774	0	0	3	1	0	0	0	1
ENSG00000229978	0	0	0	0	0	0	0	0
ENSG00000233336	0	0	0	0	0	0	0	0
ENSG00000280267	0	0	0	0	0	0	0	0
ENSG00000179412	0	0	0	0	0	0	3	1
ENSG00000204505	0	0	0	0	0	0	0	0
ENSG00000279169	0	0	0	0	0	0	0	0
ENSG00000279804	0	0	0	0	0	0	0	0
ENSG00000250894	0	0	0	0	0	0	0	0
ENSG00000270601	0	0	0	0	0	0	0	0
ENSG00000231219	0	0	0	8	0	0	0	0
ENSG00000207511	0	0	0	0	0	0	0	0
ENSG00000182330	0	0	0	0	0	0	0	0
ENSG00000237700	0	0	0	0	0	0	0	0
ENSG00000204501	0	0	0	0	0	0	0	0
ENSG00000228229	0	0	0	0	0	0	0	0
ENSG00000204481	0	0	0	0	0	0	0	0
ENSG00000204480	0	0	0	0	0	0	0	0
ENSG00000204479	0	0	0	0	0	0	0	0
ENSG00000204478	0	0	0	0	0	0	0	0
ENSG00000162494	0	0	0	0	35	0	22	0
ENSG00000259961	0	0	0	0	0	0	0	0
ENSG00000215909	0	0	0	0	0	0	0	0
ENSG00000162493	1822	724	1033	734	2021	1230	2001	724
ENSG00000222952	0	0	0	0	0	0	0	0
ENSG00000237445	0	0	0	0	0	0	0	1
ENSG00000253085	0	0	0	0	0	0	0	0
ENSG00000116731	2132	1674	2584	1975	1948	2042	3101	2098
ENSG00000189337	11	50	11	6	66	150	64	154
ENSG00000252151	0	0	0	0	0	0	0	0
ENSG00000231606	0	0	0	0	0	0	0	0
ENSG00000234593	0	0	0	0	0	0	0	0
ENSG00000235829	0	0	0	0	0	0	0	0
ENSG00000175147	117	68	198	134	59	118	141	119
ENSG00000171729	3801	4057	3001	3574	1907	2293	2480	2955
ENSG00000204464	20	5	41	32	16	13	12	21
ENSG00000215720	12	14	16	2	18	13	13	22
ENSG00000278480	10	16	12	1	0	11	16	6
ENSG00000142621	171	437	272	529	62	305	223	307
ENSG00000233485	0	2	0	0	0	6	0	10
ENSG00000236045	2	13	10	0	0	4	6	0
ENSG00000228140	10	22	37	8	12	29	16	34
ENSG00000142634	24780	15930	14923	11135	14492	13238	18304	13185
ENSG00000162438	3	2	0	0	1	6	4	1
ENSG00000142615	0	0	0	0	0	0	0	0
ENSG00000215704	0	1	15	6	1	4	2	0
ENSG00000132906	1014	664	940	691	639	705	1045	649
ENSG00000116138	978	840	1127	851	728	895	1174	947
ENSG00000251866	0	4	0	0	0	0	0	0
ENSG00000272510	0	0	0	1	0	0	6	0
ENSG00000116771	2	28	18	36	16	13	40	2
ENSG00000237301	0	0	0	2	0	0	0	0
ENSG00000235084	0	6	4	28	4	6	1	2
ENSG00000252417	0	0	0	0	0	0	0	0
ENSG00000236500	0	0	0	0	0	0	0	0
ENSG00000197312	775	1234	1290	1638	820	2880	1356	2203
ENSG00000215695	0	0	0	0	0	0	0	0
ENSG00000271742	0	0	3	1	0	0	0	0
ENSG00000116786	11845	7605	8478	6152	7056	6243	9366	7248
ENSG00000237938	42	45	105	57	46	125	87	73
ENSG00000162461	50	20	78	29	112	63	159	52
ENSG00000224459	16	0	0	0	0	0	0	0
ENSG00000162460	0	0	0	0	0	0	4	0
ENSG00000162458	68	14	42	28	94	253	65	58
ENSG00000224321	4	0	0	0	15	1	14	5
ENSG00000233954	34	190	38	178	30	98	58	106
ENSG00000178715	9	14	0	8	10	20	10	26
ENSG00000179743	92	111	84	98	93	66	88	72
ENSG00000065526	7095	4448	6995	5120	3996	5841	5969	6788
ENSG00000270620	0	0	0	0	0	0	0	0
ENSG00000116809	2161	776	1746	840	1274	1273	2174	952
ENSG00000234607	4	0	15	0	0	0	1	0
ENSG00000231353	0	0	0	0	0	0	0	0
ENSG00000275503	0	0	0	0	0	0	0	0
ENSG00000224966	0	0	0	0	0	0	0	0
ENSG00000183888	0	0	0	0	0	0	0	0
ENSG00000233078	0	0	0	0	0	0	0	0
ENSG00000173641	14	2	40	24	330	661	394	519
ENSG00000186510	0	20	8	18	39	22	80	39
ENSG00000232456	0	0	0	0	0	0	0	0
ENSG00000184908	0	0	0	0	0	0	0	0
ENSG00000185519	12	0	0	0	0	0	0	0
ENSG00000142627	199	470	174	233	225	365	194	316
ENSG00000227959	3	6	0	5	0	12	0	0
ENSG00000224621	20	25	1	6	0	0	0	9
ENSG00000234166	0	0	0	0	0	0	0	0
ENSG00000142632	48	138	82	119	49	133	86	148
ENSG00000237276	175	66	89	15	68	27	74	38
ENSG00000132881	67	146	144	111	145	143	113	150
ENSG00000233929	36	0	94	0	54	8	146	6
ENSG00000037637	2300	1960	1990	2235	1468	1670	2017	1863
ENSG00000055070	7314	6501	5803	5393	5061	5061	6142	5175
ENSG00000226457	0	2	12	6	0	0	8	0
ENSG00000187144	10	0	22	1	12	0	0	0
ENSG00000157191	7149	4814	5537	4743	5403	4434	8044	4660
ENSG00000226029	54	79	57	54	51	54	78	60
ENSG00000080947	70	57	131	94	81	150	119	85
ENSG00000206652	0	2	0	0	1	0	14	2
ENSG00000261135	0	0	0	0	4	0	0	4
ENSG00000224174	0	0	0	0	0	0	0	0
ENSG00000233421	0	0	0	0	0	0	3	0
ENSG00000277344	0	0	0	0	0	0	0	0
ENSG00000268991	0	0	0	0	0	0	0	0
ENSG00000225710	0	0	8	0	4	0	8	0
ENSG00000219481	774	507	561	513	339	786	563	831
ENSG00000271732	0	0	0	0	0	1	1	0
ENSG00000215908	765	483	1087	784	681	863	1102	712
ENSG00000283773	0	0	0	0	0	0	0	0
ENSG00000186301	22	0	44	2	36	46	25	18
ENSG00000282143	0	0	0	0	0	0	0	0
ENSG00000207513	0	0	0	0	0	0	0	0
ENSG00000237847	0	0	0	0	0	0	0	0
ENSG00000280114	1	0	8	0	4	0	0	0
ENSG00000236698	32	57	43	70	45	112	25	115
ENSG00000268869	0	0	0	0	0	0	0	0
ENSG00000279151	0	0	0	0	0	0	0	0
ENSG00000279132	0	0	0	0	0	0	0	0
ENSG00000282740	0	0	0	0	0	0	0	0
ENSG00000058453	92	149	152	185	194	351	254	314
ENSG00000227684	0	0	0	0	0	0	0	0
ENSG00000207389	2	0	0	0	0	0	0	0
ENSG00000186715	0	0	2	0	4	16	4	2
ENSG00000223643	0	0	0	0	0	0	0	0
ENSG00000230239	0	0	0	0	0	0	0	0
ENSG00000263811	0	0	0	0	0	0	0	0
ENSG00000228549	0	0	0	0	0	0	0	0
ENSG00000277234	0	0	0	0	0	0	0	0
ENSG00000238142	26	46	21	47	40	42	28	49
ENSG00000235241	1	0	2	2	4	2	3	8
ENSG00000207005	2	0	0	0	0	0	4	2
ENSG00000272426	8	0	0	4	2	0	0	0
ENSG00000117122	0	4	0	2	14	62	6	0
ENSG00000226526	0	0	0	0	0	0	0	0
ENSG00000159363	637	370	808	436	677	631	643	678
ENSG00000117118	1769	3788	1436	3353	1904	3134	2037	2687
ENSG00000117115	461	5371	282	3739	995	1328	851	851
ENSG00000204362	0	0	0	0	0	12	0	0
ENSG00000282843	0	0	0	0	0	0	0	0
ENSG00000142623	0	0	0	0	0	2	0	0
ENSG00000142619	0	0	0	0	0	0	0	0
ENSG00000266634	0	0	0	0	0	0	0	0
ENSG00000159339	16	34	14	18	180	334	174	124
ENSG00000276747	0	0	0	0	0	0	0	0
ENSG00000227751	0	0	0	0	0	0	0	0
ENSG00000179051	3843	9261	4403	9141	2963	6802	3604	6523
ENSG00000074964	2023	5548	2187	5994	1796	4112	2237	6042
ENSG00000236648	0	0	0	0	0	0	0	0
ENSG00000117148	0	0	0	0	2	0	0	0
ENSG00000261781	0	0	0	0	0	0	0	0
ENSG00000117154	4	39	14	0	44	66	30	153
ENSG00000280222	14	0	4	12	30	18	60	58
ENSG00000230035	0	0	0	0	0	0	2	0
ENSG00000225387	0	0	0	0	0	0	0	0
ENSG00000179023	0	0	0	0	14	0	4	0
ENSG00000235282	0	0	0	0	0	0	0	0
ENSG00000225478	0	0	0	0	0	0	0	0
ENSG00000009709	4	0	0	0	0	0	0	0
ENSG00000179002	0	0	0	0	0	0	0	2
ENSG00000255275	0	0	0	0	0	0	0	10
ENSG00000159423	367	632	268	376	245	465	277	492
ENSG00000265606	0	0	0	0	0	0	0	0
ENSG00000221662	0	0	0	0	0	0	0	0
ENSG00000169991	501	229	189	202	349	547	489	724
ENSG00000272084	13	4	27	0	23	26	19	10
ENSG00000127481	15059	7982	15689	9155	10589	8002	15201	9433
ENSG00000230424	21	5	0	4	29	3	0	5
ENSG00000127463	1776	2473	1722	1972	1477	2913	2106	3041
ENSG00000053372	480	1173	428	929	619	1429	767	1484
ENSG00000211454	4	0	0	2	1	15	6	4
ENSG00000162482	4	1	8	8	10	12	15	6
ENSG00000270728	0	14	4	26	0	31	8	25
ENSG00000053371	524	1746	391	1105	514	1043	948	1091
ENSG00000200403	0	5	0	1	2	2	0	6
ENSG00000040487	1329	2293	1319	1945	1035	2214	1660	2082
ENSG00000077549	17028	29674	12094	26784	9270	17702	13227	21818
ENSG00000240490	0	2	0	4	2	12	0	2
ENSG00000201609	0	0	0	0	0	0	2	0
ENSG00000235185	0	0	0	0	1	0	0	0
ENSG00000173436	80	163	51	183	64	172	108	184
ENSG00000270136	0	0	0	0	0	0	0	0
ENSG00000226396	4	30	8	36	8	54	22	35
ENSG00000158747	256	418	303	601	193	250	201	335
ENSG00000158748	18	0	0	0	0	0	6	0
ENSG00000162542	286	707	351	666	349	415	351	427
ENSG00000178828	0	0	0	0	0	0	0	0
ENSG00000235434	0	0	0	0	0	0	0	0
ENSG00000169914	138	185	240	296	111	422	258	427
ENSG00000188784	0	0	0	0	0	0	0	0
ENSG00000242688	0	0	0	0	0	0	0	0
ENSG00000188257	0	0	0	0	0	0	0	0
ENSG00000127472	0	0	0	0	2	8	0	6
ENSG00000117215	56	0	22	0	76	16	54	6
ENSG00000158786	0	0	0	0	0	0	0	0
ENSG00000227066	2	0	9	0	10	28	10	2
ENSG00000187980	0	0	0	0	0	0	2	8
ENSG00000225986	0	0	0	0	0	0	24	4
ENSG00000162543	0	0	0	0	4	8	8	0
ENSG00000228105	0	0	0	0	0	0	0	0
ENSG00000158816	2	0	0	0	0	0	0	0
ENSG00000226664	0	0	0	0	0	0	0	0
ENSG00000236963	0	0	0	0	0	0	0	0
ENSG00000226487	0	0	0	0	0	0	0	0
ENSG00000162545	6	0	0	0	6	28	0	2
ENSG00000090432	2063	2599	1651	2070	1151	1769	1606	1778
ENSG00000215520	0	0	0	0	0	0	0	0
ENSG00000183114	0	0	0	0	0	0	0	0
ENSG00000158825	40	120	14	30	58	166	142	90
ENSG00000158828	430	466	308	397	452	605	711	422
ENSG00000284005	0	0	0	0	0	0	0	0
ENSG00000117242	77	228	52	217	62	221	164	196
ENSG00000244038	5809	10553	4520	8964	4614	8113	6719	7506
ENSG00000117245	8	107	14	104	28	89	60	68
ENSG00000235432	0	0	0	0	0	0	0	0
ENSG00000189410	0	0	0	0	0	4	0	0
ENSG00000233069	0	0	0	0	0	0	0	0
ENSG00000127483	3164	3644	4201	3909	2429	5081	4372	4578
ENSG00000075151	2692	3584	3002	4835	1951	5533	3054	5331
ENSG00000251914	0	0	0	0	0	0	0	0
ENSG00000221808	0	0	2	0	0	0	0	0
ENSG00000233072	0	3	0	0	0	0	10	1
ENSG00000236073	0	2	2	1	0	0	0	0
ENSG00000235112	0	2	3	0	2	0	4	0
ENSG00000117298	30	18	14	0	389	577	376	114
ENSG00000236936	0	0	0	0	0	0	0	0
ENSG00000231105	0	0	0	0	0	0	0	0
ENSG00000236216	0	0	0	0	0	0	0	0
ENSG00000228823	0	0	0	2	0	0	0	0
ENSG00000236009	0	0	0	0	0	0	0	0
ENSG00000227001	0	0	0	0	0	1	0	0
ENSG00000187952	0	4	14	4	8	12	6	4
ENSG00000186543	0	0	0	0	0	0	0	0
ENSG00000142794	0	6	4	0	0	28	10	10
ENSG00000176378	0	0	0	0	0	0	0	0
ENSG00000162551	8	2	0	0	26	28	14	2
ENSG00000233431	0	0	0	0	0	0	0	0
ENSG00000076864	43	44	40	2	156	514	176	197
ENSG00000090686	894	1285	1266	1606	773	2324	1112	1858
ENSG00000231978	0	0	4	0	0	0	0	0
ENSG00000187942	0	0	0	2	0	2	0	7
ENSG00000142798	20	210	62	244	460	2217	753	705
ENSG00000232037	0	0	0	0	0	0	0	0
ENSG00000283234	0	0	0	0	0	0	0	0
ENSG00000219073	0	0	0	0	0	0	0	0
ENSG00000273610	0	0	0	0	0	0	0	0
ENSG00000201919	0	0	0	0	0	0	0	0
ENSG00000142789	0	0	0	0	0	0	0	0
ENSG00000278124	0	0	0	0	0	0	0	0
ENSG00000201273	0	0	0	0	0	0	0	0
ENSG00000228397	0	0	0	4	0	0	0	2
ENSG00000218510	237	228	276	254	316	458	510	383
ENSG00000070831	16608	17847	14061	15518	11255	14439	15438	16074
ENSG00000230068	6	0	12	9	17	0	33	4
ENSG00000271428	0	22	15	0	4	7	8	3
ENSG00000271840	4	4	34	7	4	2	15	6
ENSG00000162552	16	8	6	12	20	22	14	4
ENSG00000266564	0	0	0	0	0	0	0	0
ENSG00000234397	0	0	0	0	0	0	0	0
ENSG00000279625	0	0	0	0	0	0	0	0
ENSG00000184677	2504	1999	2498	2354	1405	2174	2076	2438
ENSG00000237200	2	0	9	1	0	9	6	6
ENSG00000070886	4	0	2	0	0	0	8	0
ENSG00000276835	0	0	0	0	0	0	0	0
ENSG00000173372	48368	69613	45391	58443	12920	15881	11878	16427
ENSG00000159189	89656	109546	73292	90027	31508	38817	31892	52294
ENSG00000173369	31532	20851	34059	22518	14175	8362	12529	8731
ENSG00000133216	4197	2522	4644	3299	3007	5869	3628	7493
ENSG00000265422	0	0	0	0	0	3	0	0
ENSG00000225952	2	0	4	14	2	3	0	0
ENSG00000264014	0	0	0	0	3	4	0	5
ENSG00000215906	0	0	0	0	0	0	0	0
ENSG00000227868	0	0	0	0	0	0	0	0
ENSG00000004487	1252	1598	1134	1706	898	1682	1419	1792
ENSG00000240553	0	0	6	0	1	0	0	8
ENSG00000263793	0	0	0	0	0	0	0	0
ENSG00000266802	0	0	0	1	0	0	0	0
ENSG00000169641	4752	3358	3952	3732	2733	3360	4182	3431
ENSG00000229010	6	0	4	0	4	0	0	13
ENSG00000206935	0	0	2	0	0	8	2	1
ENSG00000252578	14	0	2	0	1	0	0	6
ENSG00000179546	6	0	0	0	2	0	0	0
ENSG00000215381	2	0	0	0	0	0	0	0
ENSG00000261326	26	22	30	60	34	52	36	72
ENSG00000125944	2038	3280	2595	3093	1835	4977	3169	4481
ENSG00000125945	382	174	489	172	359	354	634	379
ENSG00000249087	15	6	16	16	22	29	62	11
ENSG00000201405	0	0	0	0	0	0	0	0
ENSG00000271420	0	0	0	0	2	0	0	0
ENSG00000204219	1	0	8	0	4	14	11	0
ENSG00000232482	0	0	0	0	0	0	0	0
ENSG00000088280	46	2	0	0	20	28	48	6
ENSG00000007968	7	168	24	226	54	371	102	168
ENSG00000235052	0	0	0	0	0	5	4	0
ENSG00000117318	1626	6076	1883	5817	2306	4196	2630	4640
ENSG00000197880	0	0	0	0	0	0	0	0
ENSG00000229239	0	0	0	0	0	0	0	0
ENSG00000142676	7276	20118	4639	16569	5699	10573	7900	10681
ENSG00000011007	3701	2830	3647	2613	2359	2879	2943	3093
ENSG00000236810	2	8	2	29	22	16	19	23
ENSG00000057757	1984	1765	1273	1370	1005	1338	1300	1431
ENSG00000011009	3888	3692	3097	3352	2221	2617	3094	2791
ENSG00000117308	1470	1850	1142	1741	1324	1698	2266	1951
ENSG00000117305	2421	1858	1884	1596	1500	1327	2047	1341
ENSG00000179163	44995	89208	48723	102641	10791	81982	9785	98291
ENSG00000188822	971	2529	731	1633	428	693	408	693
ENSG00000229106	58	122	12	86	28	77	6	51
ENSG00000232557	8	3	3	22	0	0	0	16
ENSG00000264926	0	0	0	0	0	0	0	0
ENSG00000230228	0	0	0	0	0	2	0	0
ENSG00000189266	2448	1613	4204	2506	1681	2868	2531	2467
ENSG00000188529	1545	1502	2516	2343	1172	3580	2267	2935
ENSG00000215905	0	0	0	0	0	0	0	0
ENSG00000225315	0	0	0	0	0	0	0	0
ENSG00000142661	0	1	0	0	0	12	14	6
ENSG00000230703	0	0	0	0	0	0	0	0
ENSG00000142677	0	0	0	0	0	0	0	0
ENSG00000185436	1113	327	747	222	479	216	456	274
ENSG00000230023	0	0	0	0	4	6	0	0
ENSG00000232298	0	0	0	0	0	0	0	2
ENSG00000158055	1	10	7	0	0	7	12	4
ENSG00000001460	122	36	64	16	66	102	56	36
ENSG00000001461	579	505	647	509	479	756	667	268
ENSG00000117602	456	476	451	288	556	680	687	364
ENSG00000264443	0	0	0	0	0	0	0	0
ENSG00000184454	0	0	0	0	0	0	0	1
ENSG00000227312	0	0	0	0	0	0	0	0
ENSG00000239106	0	0	0	0	0	0	0	0
ENSG00000133226	3482	4357	3224	4213	1941	3868	3070	4350
ENSG00000169504	14210	6184	18719	5322	7443	8871	12229	7867
ENSG00000238482	0	0	3	0	0	0	2	0
ENSG00000020633	4364	13389	2787	9250	1961	6266	2243	9534
ENSG00000278034	0	2	0	5	0	1	0	3
ENSG00000229162	14	21	8	30	26	60	14	37
ENSG00000261025	0	1	0	9	0	21	0	18
ENSG00000264371	0	0	0	0	0	0	0	0
ENSG00000233755	2	0	4	0	10	0	0	2
ENSG00000233419	0	0	0	0	0	0	0	0
ENSG00000231953	4	0	0	0	0	0	0	0
ENSG00000117614	1057	934	1720	1233	938	1478	1477	1157
ENSG00000117616	1759	987	4001	2236	1899	3927	4394	2716
ENSG00000272432	0	0	2	8	2	6	20	0
ENSG00000261349	10	0	24	4	8	0	9	4
ENSG00000187010	39	22	99	12	15	5	44	0
ENSG00000224183	13	8	4	41	19	4	20	6
ENSG00000259984	2	0	5	0	0	1	2	2
ENSG00000183726	8900	5295	7307	4579	5987	4859	8549	4805
ENSG00000188672	7	5	0	0	4	6	8	0
ENSG00000238084	12	14	4	4	4	10	12	4
ENSG00000204178	1044	737	915	709	959	1161	1325	993
ENSG00000157978	184	280	279	288	524	739	506	613
ENSG00000225643	0	0	0	0	6	1	0	0
ENSG00000117643	68	372	45	735	205	656	202	763
ENSG00000233478	0	0	0	0	2	8	0	12
ENSG00000162430	985	4602	1438	4131	3241	6829	3599	6428
ENSG00000255054	0	0	0	0	0	0	0	0
ENSG00000228172	6	1	12	14	4	0	13	16
ENSG00000117640	966	1098	834	1014	837	1274	1243	1458
ENSG00000272478	0	0	0	0	0	0	0	0
ENSG00000127423	10	40	18	52	2	85	64	72
ENSG00000236528	0	0	0	2	2	4	0	3
ENSG00000182749	46	347	63	274	149	265	120	225
ENSG00000207302	0	0	0	0	0	0	0	0
ENSG00000117632	70	3474	154	2401	112	1866	200	1301
ENSG00000229786	0	0	0	0	0	0	0	0
ENSG00000223624	0	0	0	0	0	0	0	0
ENSG00000283938	0	0	0	0	0	0	0	0
ENSG00000158006	1201	1976	1217	1522	878	1640	1292	1404
ENSG00000207237	0	0	0	0	2	0	0	0
ENSG00000252190	0	0	0	0	0	0	0	0
ENSG00000252691	0	0	0	0	0	0	0	0
ENSG00000158008	65	561	108	362	112	239	109	122
ENSG00000158014	144	38	252	44	448	54	444	80
ENSG00000284309	0	0	0	0	2	0	1	0
ENSG00000158022	0	0	0	0	2	1	0	0
ENSG00000175087	57	214	125	403	96	556	224	422
ENSG00000197245	0	0	0	0	0	0	0	0
ENSG00000282872	0	0	0	0	0	0	0	0
ENSG00000236782	0	10	0	4	0	0	7	1
ENSG00000142684	0	0	0	0	0	0	0	0
ENSG00000142675	0	0	0	2	0	0	0	0
ENSG00000188782	0	0	0	0	0	0	0	0
ENSG00000236155	4	0	0	0	0	14	0	0
ENSG00000278572	0	0	0	4	0	0	0	0
ENSG00000130695	722	864	568	698	649	1177	778	1101
ENSG00000270733	0	0	2	0	0	4	0	6
ENSG00000142669	12349	13021	8765	9696	10400	17969	13697	16959
ENSG00000158062	190	341	122	644	180	414	269	420
ENSG00000169442	82	302	86	98	1391	1731	1055	1166
ENSG00000176092	0	0	0	0	0	1	2	6
ENSG00000225854	0	0	0	0	0	0	0	0
ENSG00000176083	0	8	0	0	0	0	0	0
ENSG00000131914	0	2	0	0	0	0	0	2
ENSG00000117682	1359	1526	1078	1333	1186	1792	1821	1783
ENSG00000223583	2	0	6	0	2	8	8	15
ENSG00000225891	7	2	17	7	2	6	9	11
ENSG00000198830	10470	9132	8878	7710	6904	8482	10653	7966
ENSG00000224129	0	0	0	0	0	0	0	0
ENSG00000117676	18769	14422	15463	10828	12345	12092	16913	12578
ENSG00000238705	0	0	0	0	0	0	0	0
ENSG00000243905	0	0	0	0	0	0	0	0
ENSG00000252802	0	0	0	0	0	0	0	0
ENSG00000252429	0	0	0	0	0	0	0	0
ENSG00000229247	0	0	0	0	0	0	0	0
ENSG00000238316	0	0	0	0	0	0	0	0
ENSG00000235069	0	0	0	0	0	0	0	0
ENSG00000260063	2	0	8	6	6	7	14	0
ENSG00000117713	8064	6124	7416	6050	5583	5961	7756	7394
ENSG00000060642	426	472	392	404	327	329	480	263
ENSG00000241188	0	0	0	0	0	2	0	0
ENSG00000204160	2882	1408	2102	962	2117	1493	2362	1174
ENSG00000175793	0	0	0	2	6	12	4	0
ENSG00000226698	0	0	0	0	0	0	0	0
ENSG00000142751	1073	1383	947	1246	831	972	1029	1124
ENSG00000198746	1255	911	947	768	844	548	995	679
ENSG00000090273	2546	3699	1699	3047	1559	2947	2296	2885
ENSG00000131910	0	4	2	0	0	0	0	3
ENSG00000175707	0	0	0	0	0	2	0	0
ENSG00000172746	0	0	0	0	0	0	0	0
ENSG00000224064	0	0	0	0	0	0	0	0
ENSG00000225294	0	0	0	0	0	0	0	2
ENSG00000253368	4	32	0	21	17	83	8	26
ENSG00000158246	0	44	2	22	10	12	4	0
ENSG00000090020	2056	1082	2104	965	1865	1547	2578	1319
ENSG00000229985	0	0	0	0	0	0	0	0
ENSG00000214973	8	0	0	6	0	4	0	2
ENSG00000225159	4	14	10	20	2	22	12	12
ENSG00000225990	0	0	0	0	0	0	0	0
ENSG00000224311	0	0	0	0	0	0	0	0
ENSG00000142784	3539	4309	2800	2894	2552	3185	3570	3141
ENSG00000252098	0	10	0	4	0	0	0	5
ENSG00000243659	0	2	0	0	2	2	2	0
ENSG00000186501	1528	1595	1127	1351	1034	1204	1590	1262
ENSG00000206888	0	2	3	0	3	0	0	2
ENSG00000241547	4	11	7	24	3	8	31	21
ENSG00000142765	10	92	2	44	76	313	72	127
ENSG00000142733	286	923	285	464	197	592	326	588
ENSG00000142748	0	0	0	0	0	0	0	0
ENSG00000174950	4	0	0	0	6	10	0	12
ENSG00000231207	0	0	0	0	0	0	0	0
ENSG00000181773	14	44	0	36	8	78	8	78
ENSG00000158195	14021	15832	12458	13828	8631	10887	11789	11659
ENSG00000241169	8	0	3	0	1	0	0	0
ENSG00000237429	0	0	6	0	0	0	2	12
ENSG00000126705	500	876	629	773	604	1106	833	940
ENSG00000000938	3094	3970	2181	1831	4937	5634	3658	4367
ENSG00000235912	6	40	10	38	14	36	36	14
ENSG00000233975	20	0	4	0	5	1	5	0
ENSG00000126709	80765	1670	66770	4383	47330	6506	45828	5897
ENSG00000225886	124	0	165	0	88	6	73	19
ENSG00000206767	0	0	0	0	0	0	0	0
ENSG00000226662	0	0	0	0	0	0	0	0
ENSG00000207095	0	0	0	0	0	0	0	0
ENSG00000009780	237	264	285	322	207	288	321	350
ENSG00000231344	0	0	3	0	2	0	0	3
ENSG00000230833	0	0	0	0	0	2	1	0
ENSG00000117758	7263	5108	6760	5480	3707	3929	5286	3912
ENSG00000269971	4	0	14	1	0	1	8	12
ENSG00000270031	21	4	12	8	2	17	26	11
ENSG00000223062	0	0	1	7	0	0	0	0
ENSG00000117751	2022	1706	1938	1576	1236	1626	1794	1691
ENSG00000252947	0	0	2	4	0	2	0	3
ENSG00000130775	7250	2292	7411	3104	6679	4238	9038	4094
ENSG00000117748	3053	2259	1786	1666	1813	1461	2568	1831
ENSG00000130768	0	10	14	0	0	0	3	2
ENSG00000227050	0	0	0	0	0	0	0	0
ENSG00000158156	652	529	458	531	558	656	639	481
ENSG00000158161	4727	1778	5266	1804	2446	2202	3524	2128
ENSG00000238231	18	0	23	0	8	3	4	0
ENSG00000240750	10	6	9	5	14	17	0	10
ENSG00000228589	39	24	40	54	62	31	39	51
ENSG00000228943	0	0	3	2	0	1	0	0
ENSG00000214812	2	0	1	2	0	2	0	8
ENSG00000253005	0	1	4	2	3	0	6	0
ENSG00000169403	50976	11490	40060	11519	31695	13329	39329	12180
ENSG00000126698	3589	4035	2444	3289	1812	3098	2796	3145
ENSG00000130770	1143	1672	1258	1654	964	1562	1296	1490
ENSG00000270605	7	8	13	30	2	8	22	24
ENSG00000271398	0	0	0	2	0	0	0	0
ENSG00000130766	6206	2452	4984	1872	5676	2093	7784	1904
ENSG00000130772	1082	1225	733	964	664	717	796	780
ENSG00000204138	1765	1333	1738	1313	1241	1355	1955	1636
ENSG00000206779	0	0	0	0	0	0	0	0
ENSG00000229820	0	0	0	0	0	4	0	0
ENSG00000221216	1	0	1	0	0	0	0	0
ENSG00000180198	508	1304	336	1327	437	1495	676	1413
ENSG00000242125	414	535	432	796	280	1007	507	1174
ENSG00000274266	0	0	0	0	0	0	0	0
ENSG00000200087	22	58	34	69	50	34	92	39
ENSG00000231468	0	18	2	8	0	1	2	4
ENSG00000279443	6	14	14	20	4	28	2	26
ENSG00000180098	800	480	520	573	592	503	917	505
ENSG00000197989	241	314	387	449	252	652	451	753
ENSG00000221539	3	6	10	10	6	16	2	20
ENSG00000278274	0	0	0	0	0	0	0	0
ENSG00000273544	0	0	0	0	0	0	0	0
ENSG00000280498	0	0	0	0	0	0	0	0
ENSG00000274582	0	0	0	0	0	0	0	0
ENSG00000120656	1050	947	987	872	773	991	1205	945
ENSG00000188060	575	1406	488	893	580	903	715	1252
ENSG00000229388	2	4	0	2	4	20	0	20
ENSG00000270103	0	0	0	0	0	0	0	0
ENSG00000274978	0	0	0	0	0	0	0	0
ENSG00000162419	1318	944	1037	822	784	972	1094	926
ENSG00000252777	0	0	0	0	0	0	0	2
ENSG00000198492	3156	3087	2694	2874	2024	2926	2686	3009
ENSG00000116329	0	35	0	8	5	8	4	16
ENSG00000233427	0	0	4	2	2	0	0	1
ENSG00000199756	0	0	0	0	0	0	0	0
ENSG00000159023	724	2129	506	2057	1032	1952	1019	1548
ENSG00000225616	0	0	0	0	0	0	4	0
ENSG00000206704	0	0	0	0	0	0	0	0
ENSG00000277958	0	0	0	0	0	0	0	0
ENSG00000253304	0	0	0	0	0	2	0	0
ENSG00000225750	2	0	3	0	0	0	4	0
ENSG00000116350	3496	3664	3618	3326	2553	3521	4167	3749
ENSG00000277916	0	0	0	0	0	0	0	0
ENSG00000116353	112	373	138	303	91	365	246	349
ENSG00000237934	0	0	0	6	0	0	0	8
ENSG00000060656	118	132	182	187	88	76	112	48
ENSG00000230523	0	0	0	0	0	0	0	0
ENSG00000225011	0	0	0	0	0	0	0	0
ENSG00000228176	0	0	0	0	0	0	0	0
ENSG00000270927	0	0	0	0	0	0	0	0
ENSG00000233399	0	0	2	0	0	0	0	0
ENSG00000233372	0	0	0	0	0	0	0	0
ENSG00000231251	0	0	0	0	0	0	0	0
ENSG00000236335	0	0	0	0	0	0	0	0
ENSG00000231949	0	0	0	0	0	0	0	0
ENSG00000162510	0	0	4	0	4	2	0	0
ENSG00000186056	10	10	2	6	2	12	25	0
ENSG00000162511	80294	141561	76440	128530	56693	94513	83611	99570
ENSG00000264773	16	3	38	9	5	8	2	16
ENSG00000229607	0	0	0	0	0	0	0	0
ENSG00000223382	0	0	0	0	0	0	0	2
ENSG00000222784	0	0	0	0	0	0	0	0
ENSG00000235143	0	0	0	0	0	0	0	0
ENSG00000162512	1442	3399	1454	4130	1829	4342	1832	4138
ENSG00000266210	0	0	0	0	0	0	0	0
ENSG00000134644	5190	5189	4732	5190	2893	4829	4376	4694
ENSG00000237329	4	0	0	0	0	2	0	0
ENSG00000232768	0	0	0	4	0	6	0	0
ENSG00000215900	0	0	0	0	0	0	0	0
ENSG00000225142	0	0	0	0	0	0	0	0
ENSG00000084628	28	0	0	0	24	4	8	0
ENSG00000060688	1211	1516	963	1343	712	1122	1000	1266
ENSG00000229447	0	3	7	4	12	0	6	13
ENSG00000121766	870	728	628	737	505	629	760	561
ENSG00000229044	0	0	0	0	0	0	4	0
ENSG00000121769	171	616	178	309	572	1333	432	1096
ENSG00000168528	364	675	553	801	277	718	257	791
ENSG00000215899	0	0	0	0	0	0	0	0
ENSG00000206981	0	0	0	0	0	0	0	0
ENSG00000260386	8	0	0	4	0	0	0	0
ENSG00000265961	0	0	0	0	0	0	0	0
ENSG00000284543	0	0	6	4	0	0	0	4
ENSG00000229167	0	0	0	0	0	0	0	0
ENSG00000142910	4	0	0	8	8	62	16	22
ENSG00000121764	24	6	8	2	14	4	13	12
ENSG00000162517	1720	1165	1475	979	1117	967	1743	945
ENSG00000235790	4	2	1	0	0	4	0	4
ENSG00000264078	0	0	0	0	0	0	0	0
ENSG00000084636	0	0	4	2	32	36	73	10
ENSG00000121753	4	0	0	4	14	34	0	4
ENSG00000266580	0	0	0	0	0	0	0	0
ENSG00000254545	0	0	0	0	0	6	0	4
ENSG00000134668	51	8	22	34	206	969	247	482
ENSG00000203620	2	0	0	0	0	0	0	3
ENSG00000269967	13	5	29	5	22	6	40	9
ENSG00000184007	14251	8869	11349	6762	7688	8480	11404	9543
ENSG00000228634	34	1	34	0	27	12	16	21
ENSG00000121774	4224	4312	3386	4155	2421	4301	3855	4560
ENSG00000203325	1	0	13	8	8	12	3	0
ENSG00000121775	558	960	488	807	251	470	386	559
ENSG00000266203	0	3	0	0	0	0	0	0
ENSG00000276493	0	0	0	0	0	0	0	0
ENSG00000025800	4081	4214	3631	3991	2217	3505	3464	3339
ENSG00000250135	0	0	0	0	0	0	0	0
ENSG00000084652	4987	4329	4241	4778	3832	4530	5565	4813
ENSG00000160050	150	38	71	35	43	85	76	55
ENSG00000224066	7	0	4	1	3	6	1	5
ENSG00000160051	15	30	52	46	22	41	61	55
ENSG00000222046	8	29	20	6	16	2	38	26
ENSG00000160055	336	216	327	245	320	301	397	192
ENSG00000084623	3352	5794	2106	4745	2519	3849	3155	4236
ENSG00000220785	96	184	93	166	113	228	140	222
ENSG00000183615	2	0	0	1	0	8	0	0
ENSG00000182866	0	2	0	0	0	0	0	0
ENSG00000277617	0	0	0	0	0	0	0	0
ENSG00000252450	0	0	0	0	0	0	0	0
ENSG00000116478	3923	4593	3194	4175	2670	3271	4193	3440
ENSG00000175130	7760	10204	4544	6694	2386	2770	2538	2888
ENSG00000233775	0	0	6	8	2	2	2	6
ENSG00000162526	12	11	22	29	0	7	18	11
ENSG00000225828	38	7	37	24	56	45	74	40
ENSG00000160058	2715	1906	2878	1871	2390	2284	3464	2206
ENSG00000224333	0	0	0	0	0	0	0	0
ENSG00000270850	0	0	0	0	0	0	0	0
ENSG00000229259	0	0	0	0	0	0	0	0
ENSG00000263529	0	0	0	0	0	0	0	0
ENSG00000254553	0	0	0	0	0	0	0	0
ENSG00000273274	4	0	0	0	0	0	0	0
ENSG00000160062	14	18	41	16	44	105	26	30
ENSG00000176261	414	448	590	624	304	421	533	410
ENSG00000200591	0	0	3	0	4	3	0	4
ENSG00000162521	3453	4671	3147	4272	2200	4574	3090	4385
ENSG00000162520	0	1	0	0	0	47	0	4
ENSG00000224409	0	0	0	0	0	0	0	8
ENSG00000162522	498	821	737	585	710	1144	500	609
ENSG00000134684	2788	4947	2446	4305	2070	3683	2526	3760
ENSG00000116497	466	730	635	736	425	673	591	733
ENSG00000160097	0	4	0	8	5	12	4	0
ENSG00000121905	4	0	7	0	2	0	4	0
ENSG00000121900	87	25	79	6	32	10	12	0
ENSG00000116514	23884	6614	17685	3904	10775	3840	15920	4829
ENSG00000278966	0	0	2	0	38	24	18	31
ENSG00000217644	8	6	0	2	43	20	50	15
ENSG00000239670	25	1	12	12	19	27	28	6
ENSG00000236065	4	0	0	5	2	8	4	2
ENSG00000004455	2694	5521	2484	4306	1922	3170	2648	3527
ENSG00000276645	0	0	0	0	2	0	0	0
ENSG00000142920	158	86	219	68	109	28	100	38
ENSG00000278997	16	34	17	12	16	4	39	2
ENSG00000116525	467	442	459	358	357	241	509	332
ENSG00000279179	33	16	4	22	13	6	26	25
ENSG00000160094	1183	1924	1163	1561	1015	1185	1527	1207
ENSG00000270115	5	0	2	6	0	15	22	19
ENSG00000184389	2	6	23	0	0	0	0	0
ENSG00000225313	282	174	404	344	246	202	539	264
ENSG00000134686	7259	9455	5274	7572	5276	5371	8341	6597
ENSG00000284154	5	3	8	3	9	5	6	4
ENSG00000222112	55	21	63	65	33	50	55	58
ENSG00000233246	4	13	2	5	3	6	0	25
ENSG00000234512	0	45	0	22	0	8	4	0
ENSG00000121903	450	429	400	371	267	274	423	396
ENSG00000235907	0	0	4	0	10	2	0	0
ENSG00000121904	6	0	0	0	2	19	71	24
ENSG00000227000	0	0	0	0	0	0	0	0
ENSG00000176256	0	0	0	0	0	0	0	0
ENSG00000231163	0	0	0	0	0	0	0	0
ENSG00000201148	0	0	0	0	0	0	0	0
ENSG00000142698	0	0	0	0	0	0	0	0
ENSG00000270241	0	0	0	0	0	0	0	0
ENSG00000207941	0	0	0	0	0	0	0	0
ENSG00000163866	1869	2052	1343	1671	1423	1553	2133	1933
ENSG00000189280	0	0	0	0	0	0	0	0
ENSG00000189433	0	0	0	0	0	0	0	0
ENSG00000255811	0	0	0	0	0	0	0	0
ENSG00000188910	0	0	0	0	0	0	0	0
ENSG00000187513	0	0	0	0	4	0	4	0
ENSG00000230163	37	40	40	50	20	58	31	59
ENSG00000116544	0	178	2	74	2	146	4	201
ENSG00000241014	54	20	109	81	28	94	76	71
ENSG00000271741	0	0	0	0	0	0	0	0
ENSG00000243749	1	0	0	0	2	3	8	0
ENSG00000163867	129	234	414	605	157	427	232	463
ENSG00000233940	0	0	0	0	0	0	0	0
ENSG00000197056	190	204	453	324	174	455	298	325
ENSG00000228348	0	0	0	2	0	2	0	10
ENSG00000116560	5402	6015	5853	7631	3578	9082	6222	9895
ENSG00000201868	0	0	0	0	0	0	0	0
ENSG00000146463	1827	1633	2462	2110	1168	2447	1765	2182
ENSG00000240374	4	0	12	0	0	0	0	0
ENSG00000201542	0	0	1	0	0	0	0	0
ENSG00000229994	10	8	12	20	2	14	0	4
ENSG00000227409	0	0	0	1	1	0	0	0
ENSG00000278702	0	0	0	0	0	0	0	0
ENSG00000142687	3009	3221	2849	3107	1829	2605	2835	2450
ENSG00000236274	0	0	4	0	2	0	0	0
ENSG00000020129	743	1037	773	1214	521	1040	710	602
ENSG00000239636	2	3	4	4	14	30	26	10
ENSG00000116819	11	8	73	60	21	10	38	19
ENSG00000126067	3401	3812	2843	3634	2290	3396	3576	3294
ENSG00000142686	538	392	472	426	404	732	538	874
ENSG00000092853	99	148	109	171	99	453	117	285
ENSG00000232335	0	0	0	0	0	0	0	0
ENSG00000134698	1480	1613	2323	2124	1437	2234	2677	2254
ENSG00000092847	2197	3454	2486	3572	2459	4397	3748	3897
ENSG00000271164	0	0	0	0	0	0	0	0
ENSG00000271914	0	0	0	0	0	0	0	0
ENSG00000126070	866	520	1615	899	998	1404	1892	1493
ENSG00000271554	16	1	0	8	9	1	4	0
ENSG00000232862	6	0	0	0	0	0	0	0
ENSG00000092850	0	1	0	0	0	2	0	2
ENSG00000116863	622	1005	791	871	651	864	932	696
ENSG00000171812	56	973	128	817	274	603	157	334
ENSG00000054116	2512	2968	2108	2292	1679	1907	2316	2099
ENSG00000116871	14543	9813	10310	9132	9931	9788	12414	9814
ENSG00000264592	0	0	0	0	0	0	0	0
ENSG00000054118	5109	5871	5124	6591	3531	6411	5715	6285
ENSG00000231849	0	0	0	0	0	0	0	2
ENSG00000214193	135	341	844	1068	315	472	473	290
ENSG00000142694	137	335	667	1484	194	352	217	401
ENSG00000116883	36	20	91	160	67	78	84	50
ENSG00000196182	7778	7131	8542	10859	3534	4821	4646	6573
ENSG00000181817	1094	1943	850	1675	586	1169	865	1296
ENSG00000222821	0	0	0	6	0	0	0	0
ENSG00000116885	52	45	69	53	33	39	72	28
ENSG00000201448	0	0	0	3	0	0	0	0
ENSG00000116898	465	1286	519	898	478	987	808	1288
ENSG00000119535	166	828	151	670	492	739	542	479
ENSG00000230214	0	0	0	0	0	0	0	0
ENSG00000234481	0	0	0	0	0	0	0	0
ENSG00000163873	0	0	0	0	0	0	0	0
ENSG00000264698	0	0	0	0	0	0	0	0
ENSG00000207328	0	0	0	0	0	0	0	0
ENSG00000223944	0	0	0	0	0	0	0	0
ENSG00000252368	0	0	0	0	0	0	0	0
ENSG00000230451	0	0	0	0	0	0	0	0
ENSG00000233621	310	180	221	134	175	138	271	181
ENSG00000163874	10150	596	7697	435	7304	811	11713	554
ENSG00000283724	0	0	0	0	0	0	0	0
ENSG00000163875	598	596	994	1033	861	1070	1071	1164
ENSG00000263675	1	0	6	16	2	10	9	8
ENSG00000163877	1165	819	1041	750	810	817	894	871
ENSG00000232273	26	0	14	4	8	4	14	2
ENSG00000237749	0	2	2	4	0	2	0	0
ENSG00000163879	31	50	78	52	42	56	17	66
ENSG00000134697	1170	1049	1095	931	606	1735	952	1246
ENSG00000169218	0	0	0	0	0	0	0	8
ENSG00000116922	401	343	385	541	234	523	420	322
ENSG00000134690	234	154	181	244	128	240	162	215
ENSG00000183317	4	0	20	0	54	109	118	16
ENSG00000200421	0	0	0	0	0	0	0	0
ENSG00000214141	0	0	0	0	0	0	0	0
ENSG00000227416	0	0	0	0	0	0	0	0
ENSG00000185090	221	18	287	50	188	44	327	43
ENSG00000233728	0	0	0	0	0	0	0	0
ENSG00000196449	1050	372	852	322	649	592	1097	501
ENSG00000197982	13315	1108	8299	1259	7852	1356	12066	1224
ENSG00000188786	11255	3220	11196	3190	7325	3077	11404	3000
ENSG00000235673	18	0	9	0	0	3	5	6
ENSG00000230955	0	0	0	0	0	0	0	0
ENSG00000204084	2428	1275	2461	1202	1588	1420	2423	1313
ENSG00000252448	23	6	21	10	31	24	23	9
ENSG00000222282	8	0	16	6	8	10	1	0
ENSG00000277168	0	0	0	0	0	0	0	0
ENSG00000183431	2272	3697	2068	3545	1467	3252	2017	3277
ENSG00000212541	18	22	15	4	7	15	18	27
ENSG00000183386	1610	1163	1141	998	1371	1750	1919	1882
ENSG00000183520	657	935	611	978	522	1029	809	1040
ENSG00000185668	22	0	0	0	6	8	6	7
ENSG00000224592	0	0	0	0	0	0	0	0
ENSG00000223589	0	0	0	0	0	0	0	0
ENSG00000265596	0	0	0	0	0	0	0	0
ENSG00000237290	0	0	0	0	0	0	0	0
ENSG00000275350	0	0	0	0	0	0	0	0
ENSG00000200796	0	0	0	0	0	0	0	0
ENSG00000238063	0	0	0	0	0	0	0	0
ENSG00000215895	28	24	18	18	36	36	48	23
ENSG00000116954	1052	960	1039	827	660	845	1003	1081
ENSG00000273637	0	0	0	0	0	0	0	0
ENSG00000228436	28	23	15	19	31	16	30	29
ENSG00000214114	218	562	252	682	140	458	199	512
ENSG00000274944	0	0	0	0	0	0	0	0
ENSG00000131233	0	0	0	1	0	0	0	0
ENSG00000158315	0	2	5	8	6	3	18	6
ENSG00000199963	0	0	0	0	0	1	0	0
ENSG00000207466	0	0	0	0	0	0	0	0
ENSG00000235549	0	0	0	0	0	0	0	0
ENSG00000174574	6147	5027	4079	4022	3668	4253	4938	4507
ENSG00000168653	1484	3010	1192	2624	1594	2775	2238	2529
ENSG00000127603	12570	8350	17602	18140	9359	20210	16220	20511
ENSG00000206654	5	0	9	2	3	0	0	0
ENSG00000222378	4	0	0	10	0	0	0	0
ENSG00000270040	0	0	0	0	0	0	6	0
ENSG00000226438	0	0	0	2	6	2	0	1
ENSG00000217897	0	6	2	0	4	4	9	0
ENSG00000183682	2	6	3	8	12	11	13	11
ENSG00000237624	0	0	0	0	0	4	0	2
ENSG00000182109	25	15	30	39	56	66	91	42
ENSG00000243970	2	2	7	7	10	15	83	25
ENSG00000090621	1881	5710	1750	5894	2123	5845	2935	5341
ENSG00000228060	0	15	10	0	3	3	4	8
ENSG00000201457	0	11	7	6	3	10	0	3
ENSG00000163909	10	144	8	50	0	28	12	24
ENSG00000225903	0	0	0	0	0	0	0	0
ENSG00000116981	0	0	0	0	0	0	0	0
ENSG00000116983	4	0	0	0	0	2	2	0
ENSG00000084072	816	1136	707	1322	478	880	761	901
ENSG00000225333	0	0	0	0	0	0	0	0
ENSG00000252413	0	0	0	0	0	0	0	0
ENSG00000116985	34	153	26	80	12	51	18	50
ENSG00000198754	0	0	0	0	0	4	0	0
ENSG00000261798	0	0	0	6	0	4	0	0
ENSG00000229213	0	0	0	0	0	0	0	0
ENSG00000043514	262	385	209	388	99	406	258	403
ENSG00000202222	0	0	0	0	0	0	0	0
ENSG00000116990	767	1925	543	775	269	379	607	435
ENSG00000236546	0	2	6	2	0	2	0	2
ENSG00000207356	0	0	0	0	0	0	0	3
ENSG00000168389	592	505	438	246	499	505	791	365
ENSG00000228477	8	14	8	6	28	16	35	20
ENSG00000131236	38530	46007	27978	37605	24067	33684	32540	35745
ENSG00000131238	8382	18821	6700	15593	5993	12151	5984	11263
ENSG00000226745	0	0	0	0	0	0	0	0
ENSG00000117000	380	220	1076	617	591	1138	1025	843
ENSG00000207508	0	8	7	1	0	0	4	0
ENSG00000188800	0	0	0	0	4	0	2	0
ENSG00000259943	38	24	64	14	70	62	82	60
ENSG00000084073	2704	2336	3612	2664	1705	3780	2448	3372
ENSG00000231296	0	0	7	3	4	6	5	0
ENSG00000049089	314	294	643	268	268	272	298	162
ENSG00000227311	0	0	0	0	0	0	0	0
ENSG00000084070	11760	5628	10680	4732	5605	3992	8601	4251
ENSG00000213172	5	0	2	0	0	0	0	4
ENSG00000187801	16	30	65	8	22	90	31	56
ENSG00000260920	20	10	50	23	49	58	30	38
ENSG00000279667	2	0	8	0	1	0	3	8
ENSG00000187815	46	64	76	96	26	116	70	85
ENSG00000238287	0	10	0	2	7	3	9	3
ENSG00000164002	81	60	173	72	80	144	113	103
ENSG00000227278	2	0	0	0	0	0	0	0
ENSG00000238186	3	1	9	4	0	2	0	9
ENSG00000117010	16	44	141	51	36	126	41	64
ENSG00000236505	0	0	0	0	0	0	0	0
ENSG00000233910	0	0	0	0	0	0	0	0
ENSG00000117016	477	1023	696	1155	806	1286	1150	1386
ENSG00000237899	0	0	2	0	2	7	1	8
ENSG00000272145	20	16	24	22	4	20	50	40
ENSG00000066136	2402	2067	1946	1915	1427	1673	2449	1519
ENSG00000198974	0	0	0	0	0	0	0	1
ENSG00000207962	0	0	0	0	0	0	3	0
ENSG00000117013	12	0	8	0	24	0	10	2
ENSG00000264582	0	0	0	0	0	0	0	0
ENSG00000179862	10	26	0	20	0	20	6	18
ENSG00000229528	0	0	0	0	0	0	0	0
ENSG00000228940	0	0	0	0	2	0	0	0
ENSG00000233118	0	0	0	0	0	0	0	0
ENSG00000171793	615	1192	476	1163	409	1152	676	1340
ENSG00000281207	10	5	20	23	6	33	8	35
ENSG00000171790	4	0	2	8	0	8	6	16
ENSG00000010803	195	287	134	129	159	216	228	252
ENSG00000215893	0	0	0	0	0	0	0	0
ENSG00000235358	0	0	0	0	2	0	4	0
ENSG00000213987	0	0	0	0	0	0	0	0
ENSG00000204060	0	0	0	0	0	0	6	0
ENSG00000229901	0	0	0	0	0	0	0	0
ENSG00000252563	0	0	0	0	0	0	0	0
ENSG00000127129	0	0	0	0	0	9	2	0
ENSG00000127124	852	3455	1333	2154	1202	3786	1369	3662
ENSG00000230881	0	0	0	0	0	21	0	4
ENSG00000230638	0	0	4	8	4	28	8	28
ENSG00000227538	0	0	0	0	0	0	0	0
ENSG00000228776	0	0	0	0	0	0	0	0
ENSG00000044012	0	0	0	0	0	0	0	0
ENSG00000197273	0	0	0	0	0	0	0	0
ENSG00000198815	1272	1403	1458	1596	1047	1631	1654	1720
ENSG00000227527	0	3	0	0	2	0	0	0
ENSG00000177181	2	2	12	29	38	4	32	10
ENSG00000235002	0	0	0	0	0	0	0	0
ENSG00000066185	10	20	15	6	12	23	30	2
ENSG00000127125	1137	1674	1172	1536	900	1509	1241	1237
ENSG00000186409	48	2	42	21	20	66	56	76
ENSG00000230116	0	0	0	0	0	0	0	0
ENSG00000236876	7	11	3	3	4	6	6	10
ENSG00000200254	0	0	0	0	0	0	0	0
ENSG00000236180	0	0	0	0	0	0	0	0
ENSG00000171960	297	628	210	661	282	567	355	641
ENSG00000234917	4	0	0	8	1	3	0	15
ENSG00000065978	19531	39647	12139	32400	13946	28025	17229	30520
ENSG00000164007	0	0	2	0	0	8	0	0
ENSG00000117385	1042	1226	1192	1363	1013	1782	1609	1498
ENSG00000164008	17	9	6	12	4	6	7	37
ENSG00000283580	0	0	0	0	0	0	0	0
ENSG00000228452	22	57	37	50	14	33	15	25
ENSG00000274386	9	12	21	2	6	12	6	0
ENSG00000177868	258	307	217	276	68	235	173	208
ENSG00000164010	491	563	392	503	308	446	494	628
ENSG00000228192	16	12	59	11	12	22	14	13
ENSG00000164011	243	316	258	312	230	295	275	289
ENSG00000233708	0	0	0	0	0	0	0	0
ENSG00000237090	0	0	0	0	0	0	0	0
ENSG00000225099	10	8	2	0	4	0	6	0
ENSG00000117394	188	62	72	81	740	1056	1526	280
ENSG00000284138	0	0	0	0	4	6	0	0
ENSG00000227533	0	0	0	0	2	0	7	0
ENSG00000283973	0	0	0	0	0	0	0	0
ENSG00000207256	0	0	0	0	0	0	0	0
ENSG00000283136	0	0	0	0	0	0	0	0
ENSG00000277513	0	0	0	0	0	0	0	0
ENSG00000186973	0	0	0	0	0	0	0	0
ENSG00000117395	500	900	388	853	299	873	435	901
ENSG00000284410	0	0	0	0	0	0	0	0
ENSG00000243710	10	0	0	0	0	0	0	0
ENSG00000199240	0	0	0	0	0	0	0	0
ENSG00000179178	0	0	0	0	0	4	0	0
ENSG00000253313	0	0	0	0	0	0	0	0
ENSG00000066056	16	50	40	6	678	1568	610	798
ENSG00000117400	0	4	4	14	4	8	8	0
ENSG00000234694	8	6	2	13	9	4	22	14
ENSG00000117399	28	248	20	250	68	591	104	328
ENSG00000066322	3708	2904	3210	3097	2975	3614	4214	3827
ENSG00000283836	0	0	0	0	0	0	0	0
ENSG00000159479	1196	1186	892	887	798	1028	952	986
ENSG00000229431	28	0	17	37	5	29	14	25
ENSG00000198198	2303	2054	2674	2110	1872	2092	2453	2346
ENSG00000229372	0	0	0	0	0	0	0	0
ENSG00000274975	0	0	0	0	0	0	0	0
ENSG00000178922	0	0	0	0	0	0	0	0
ENSG00000229348	0	0	0	0	0	0	0	0
ENSG00000142949	4268	42	2535	42	5871	3565	7927	1503
ENSG00000066135	2198	2178	1781	2169	1320	1433	1939	1611
ENSG00000236200	14	4	10	20	8	32	12	17
ENSG00000126091	140	215	119	240	52	228	74	149
ENSG00000229444	0	0	0	4	0	1	0	0
ENSG00000283414	0	0	0	0	0	2	0	1
ENSG00000233674	0	0	8	1	0	2	0	0
ENSG00000283477	0	0	0	0	0	0	0	0
ENSG00000224751	0	0	0	0	0	7	0	0
ENSG00000117407	0	0	0	4	0	0	0	2
ENSG00000237950	0	12	0	2	6	6	0	4
ENSG00000117408	945	1525	940	1387	892	1814	1354	1804
ENSG00000132768	298	788	306	726	302	666	376	752
ENSG00000117410	9514	10754	8044	8324	9716	10376	12274	10198
ENSG00000117411	62	138	40	148	96	259	128	189
ENSG00000159214	45	39	71	40	60	50	25	69
ENSG00000196517	0	0	0	2	6	45	0	0
ENSG00000230615	0	0	6	0	2	26	10	2
ENSG00000227163	0	0	0	0	0	0	0	0
ENSG00000271647	0	0	0	0	0	0	0	0
ENSG00000239560	6	0	0	0	0	0	0	0
ENSG00000171872	0	0	0	0	0	0	0	0
ENSG00000233514	0	8	2	2	0	8	6	8
ENSG00000283039	0	0	0	0	0	0	0	0
ENSG00000226804	0	0	0	0	0	0	0	0
ENSG00000200171	0	0	0	0	0	0	0	0
ENSG00000238037	0	0	0	0	0	0	0	0
ENSG00000227994	0	0	0	0	0	0	0	0
ENSG00000271329	0	0	0	0	0	0	0	0
ENSG00000178028	1124	1034	1149	984	768	1044	1180	827
ENSG00000117419	495	794	347	699	412	751	581	857
ENSG00000233602	0	4	6	18	0	5	8	2
ENSG00000199385	0	0	0	0	0	0	0	0
ENSG00000187147	1502	1697	912	1366	937	1244	1497	1502
ENSG00000263381	0	0	0	0	0	0	0	0
ENSG00000126106	374	636	308	342	235	420	354	319
ENSG00000198520	10	12	19	20	54	54	66	36
ENSG00000199377	0	0	0	0	0	4	0	0
ENSG00000200169	0	0	0	0	0	0	0	0
ENSG00000142945	31	109	48	119	53	324	85	221
ENSG00000225721	0	0	0	2	0	0	0	0
ENSG00000142937	4176	13131	2958	10248	4076	9079	5922	8848
ENSG00000264294	0	0	0	0	0	0	0	0
ENSG00000200913	5	0	5	6	0	2	4	3
ENSG00000202031	0	0	0	0	0	0	0	0
ENSG00000207421	0	0	0	0	0	0	0	0
ENSG00000281859	0	0	0	0	0	0	0	0
ENSG00000234093	4	2	0	2	2	2	2	6
ENSG00000142959	2	1	0	0	0	4	12	0
ENSG00000173846	3490	706	2940	591	3449	1552	4370	1424
ENSG00000188396	24	0	54	8	39	67	57	26
ENSG00000222009	535	345	1193	573	743	909	1442	848
ENSG00000117425	12	54	34	115	63	80	72	80
ENSG00000202444	0	0	0	0	0	0	0	0
ENSG00000226499	3	8	2	7	0	7	4	0
ENSG00000070785	408	762	281	725	308	568	348	620
ENSG00000253039	0	0	4	2	4	0	1	1
ENSG00000229815	0	0	0	0	0	0	0	0
ENSG00000232369	0	0	0	0	0	0	0	0
ENSG00000268949	0	0	0	0	0	0	0	0
ENSG00000126107	2679	2410	2210	2677	1937	2247	2577	2510
ENSG00000126088	1629	2770	1379	2456	1224	1956	2058	1974
ENSG00000162415	8	0	6	0	4	2	6	0
ENSG00000234315	0	0	0	8	0	0	0	0
ENSG00000281912	0	2	0	0	0	0	0	0
ENSG00000186603	14	0	0	6	2	48	10	18
ENSG00000132781	329	206	267	272	305	340	442	340
ENSG00000132773	347	261	250	257	185	300	272	255
ENSG00000070759	155	298	250	222	244	324	290	334
ENSG00000236872	0	0	0	0	0	0	0	0
ENSG00000280670	27	64	25	91	39	18	58	40
ENSG00000132763	106	227	158	249	104	188	119	170
ENSG00000117450	13804	15306	11040	12010	11327	12211	13571	10331
ENSG00000234379	0	0	1	0	0	0	0	0
ENSG00000117448	4523	8441	3452	5850	3582	6734	5117	6045
ENSG00000281133	0	0	0	0	0	0	0	2
ENSG00000280836	0	0	0	0	0	12	5	0
ENSG00000132780	1853	2033	2503	2357	1414	2972	2342	3142
ENSG00000281112	0	0	0	0	0	0	0	0
ENSG00000281825	0	0	3	0	0	0	0	0
ENSG00000159588	59	46	113	62	81	88	94	116
ENSG00000159592	5304	3316	4812	3266	3316	3645	4572	3716
ENSG00000225447	4	3	20	8	10	22	22	15
ENSG00000234329	19	6	30	24	15	37	51	42
ENSG00000159596	581	597	514	772	385	883	659	816
ENSG00000197429	139	59	200	116	115	167	239	77
ENSG00000230896	3	0	12	3	18	3	14	8
ENSG00000236111	0	2	0	2	0	0	0	4
ENSG00000086015	2112	2573	1472	1818	1515	2511	2285	2872
ENSG00000232467	0	0	8	0	0	1	0	0
ENSG00000117461	62	243	84	242	137	452	194	233
ENSG00000278139	0	0	0	0	0	0	0	0
ENSG00000226957	0	0	0	0	0	0	0	2
ENSG00000233114	0	0	0	0	0	0	0	0
ENSG00000227857	0	0	0	0	0	0	0	0
ENSG00000117472	2	0	0	1	8	6	4	2
ENSG00000250719	0	0	0	0	0	0	0	0
ENSG00000085998	702	870	497	856	921	1241	1146	1234
ENSG00000171357	0	0	8	2	0	4	3	0
ENSG00000085999	4	57	36	53	6	111	12	56
ENSG00000132128	2351	3171	2503	3002	2203	2488	2976	2811
ENSG00000173660	2172	9133	1956	7709	2360	5169	3451	4454
ENSG00000117481	865	1040	748	1147	503	795	731	907
ENSG00000225779	0	6	6	0	0	0	0	4
ENSG00000117480	53	112	102	116	65	54	92	60
ENSG00000232022	26	6	2	18	6	18	1	2
ENSG00000224863	0	0	0	0	0	0	6	0
ENSG00000197587	0	0	0	0	0	0	0	0
ENSG00000282881	0	0	4	0	0	0	0	0
ENSG00000269956	107	140	216	227	132	233	164	244
ENSG00000162456	0	0	0	0	0	0	0	6
ENSG00000079277	6672	11572	7789	13560	4288	8809	5906	12011
ENSG00000142961	5889	3379	4625	3299	2163	3035	2813	4385
ENSG00000123472	602	1133	583	1079	397	955	601	1088
ENSG00000233647	0	0	0	0	0	2	0	0
ENSG00000186118	0	0	10	7	6	3	3	0
ENSG00000228237	6	0	5	18	3	7	19	3
ENSG00000159658	6295	7967	6945	8363	3825	7252	5869	7273
ENSG00000236476	0	0	0	0	0	0	0	0
ENSG00000142973	2	0	0	0	0	0	0	0
ENSG00000154198	0	0	0	0	0	0	0	0
ENSG00000238145	0	0	0	0	0	0	0	0
ENSG00000187048	0	0	0	0	0	0	0	0
ENSG00000259832	0	0	0	0	0	0	0	0
ENSG00000261196	0	0	0	0	0	0	0	0
ENSG00000261593	0	0	0	0	0	0	0	0
ENSG00000261290	0	0	0	0	0	0	0	0
ENSG00000186377	0	0	2	24	171	161	108	99
ENSG00000186160	0	4	2	0	0	0	0	0
ENSG00000225154	0	0	0	0	0	0	0	0
ENSG00000225506	2	4	0	5	0	0	0	0
ENSG00000162365	0	0	8	0	0	7	0	0
ENSG00000225514	0	0	0	0	0	0	0	0
ENSG00000224805	0	8	2	0	0	0	0	0
ENSG00000162366	0	0	0	0	28	0	14	0
ENSG00000162367	96	3314	135	4639	235	2905	417	4501
ENSG00000226252	10	203	16	447	6	354	62	509
ENSG00000123473	107	208	165	272	102	311	212	248
ENSG00000162368	1175	1712	2507	2773	1394	4480	2720	3868
ENSG00000225762	2	0	13	18	7	18	0	10
ENSG00000186790	0	0	0	0	0	0	0	10
ENSG00000237424	70	40	88	104	136	172	160	184
ENSG00000186564	41	24	28	61	87	56	88	127
ENSG00000271355	0	0	0	0	0	0	0	0
ENSG00000229554	0	0	0	0	0	0	0	0
ENSG00000227883	0	0	0	0	0	0	0	0
ENSG00000227947	0	0	0	0	0	0	0	0
ENSG00000269113	0	0	0	0	4	10	0	0
ENSG00000223814	0	0	0	0	0	0	0	0
ENSG00000225028	0	0	0	0	0	0	0	0
ENSG00000226133	0	0	0	0	0	0	0	0
ENSG00000231413	0	0	0	0	0	0	0	0
ENSG00000237180	0	0	0	0	0	0	0	0
ENSG00000242267	0	0	0	0	0	0	0	0
ENSG00000279096	0	0	0	0	0	0	0	0
ENSG00000223720	0	0	0	0	0	0	0	0
ENSG00000117834	2	0	0	0	0	2	4	0
ENSG00000272491	0	0	0	0	0	0	0	0
ENSG00000279214	0	0	0	0	0	0	0	0
ENSG00000132122	24	14	38	38	14	36	48	20
ENSG00000224986	0	0	0	0	0	0	0	0
ENSG00000206700	0	0	0	0	0	0	0	0
ENSG00000235105	16	4	2	4	8	2	4	4
ENSG00000223175	0	0	0	0	0	0	0	0
ENSG00000232514	0	0	0	0	0	0	0	0
ENSG00000186094	0	10	0	0	0	0	0	0
ENSG00000162373	0	0	0	0	0	8	0	0
ENSG00000229846	0	0	0	0	0	0	0	0
ENSG00000230114	0	0	0	0	0	0	0	0
ENSG00000225623	0	0	0	0	0	0	0	0
ENSG00000237478	0	0	0	0	0	0	0	0
ENSG00000215887	0	0	0	0	0	0	0	0
ENSG00000279324	0	0	0	0	0	0	0	0
ENSG00000233595	0	0	0	0	0	0	0	0
ENSG00000162374	419	206	352	232	176	511	214	504
ENSG00000230828	0	0	0	0	0	4	0	2
ENSG00000237337	0	0	0	0	8	6	10	26
ENSG00000233407	0	0	0	0	0	0	0	0
ENSG00000234080	0	2	0	0	0	2	0	0
ENSG00000229316	0	0	0	0	0	0	0	0
ENSG00000225671	0	0	0	0	0	0	0	0
ENSG00000142700	0	0	0	0	2	0	0	0
ENSG00000185104	434	987	448	771	473	901	562	809
ENSG00000225767	0	0	2	14	0	0	5	18
ENSG00000207194	0	0	0	0	3	0	0	0
ENSG00000230585	5	0	1	6	0	0	10	2
ENSG00000237130	0	0	0	0	0	0	0	4
ENSG00000123080	42	260	52	294	72	418	154	206
ENSG00000265538	0	0	0	0	0	0	0	0
ENSG00000275816	0	0	0	0	0	0	0	0
ENSG00000204006	0	0	0	0	0	0	0	0
ENSG00000200262	0	0	0	0	0	0	0	0
ENSG00000213478	0	0	0	0	0	0	0	0
ENSG00000203356	0	0	7	3	0	0	0	0
ENSG00000123091	2610	2068	2289	2216	1848	2182	2743	2204
ENSG00000233406	2	10	2	12	0	12	7	12
ENSG00000236434	0	0	6	0	2	0	0	0
ENSG00000085831	19	12	46	12	57	69	78	30
ENSG00000261664	0	0	0	0	0	0	0	0
ENSG00000085832	3954	5363	4773	9408	2396	8111	3839	10047
ENSG00000232027	0	7	5	13	0	5	21	10
ENSG00000206595	0	0	0	0	2	9	6	1
ENSG00000238140	0	0	0	7	0	8	4	0
ENSG00000227070	3	0	0	2	1	2	0	15
ENSG00000252032	0	0	0	0	0	0	0	0
ENSG00000227742	0	0	0	0	0	0	0	0
ENSG00000117859	1350	2427	1668	2505	1039	2843	1729	2647
ENSG00000236973	0	0	6	0	0	0	0	0
ENSG00000232846	0	0	0	0	0	0	0	0
ENSG00000212624	0	0	0	0	0	0	0	0
ENSG00000078618	5480	4990	6087	4705	4088	6369	6089	6057
ENSG00000266993	2	0	38	23	14	29	26	21
ENSG00000272175	0	0	0	0	0	3	0	0
ENSG00000283899	0	0	1	0	0	0	0	0
ENSG00000230604	0	0	2	0	10	0	3	2
ENSG00000169213	0	0	0	8	22	164	0	22
ENSG00000200839	0	0	0	0	0	0	0	0
ENSG00000229032	0	0	0	0	0	0	0	0
ENSG00000264613	0	0	0	0	0	0	0	0
ENSG00000117862	3486	4168	3073	4190	2598	3557	3312	4307
ENSG00000198841	233	216	202	295	112	251	205	273
ENSG00000223390	0	0	0	0	0	16	10	4
ENSG00000228369	4	2	6	16	8	4	19	0
ENSG00000134717	2161	2712	1876	2625	1172	2450	1911	2489
ENSG00000157077	7	42	40	246	27	85	16	38
ENSG00000241745	0	0	0	0	0	0	0	0
ENSG00000228407	0	0	2	0	2	0	2	0
ENSG00000223429	0	0	0	0	0	0	0	0
ENSG00000224255	0	0	0	0	0	2	0	0
ENSG00000236004	0	0	0	0	0	0	0	0
ENSG00000237663	0	0	0	0	0	0	0	0
ENSG00000213735	2	2	2	0	0	4	0	0
ENSG00000154222	2418	1685	2987	1813	1912	1919	3409	2032
ENSG00000272100	3	5	1	10	11	14	4	0
ENSG00000224680	0	3	6	0	6	0	13	2
ENSG00000085840	103	320	132	217	107	251	109	254
ENSG00000134748	1088	1287	1146	1296	841	1310	1144	1156
ENSG00000134744	417	723	559	1288	468	1485	676	1182
ENSG00000272371	0	0	0	0	0	0	0	0
ENSG00000236290	0	0	0	0	0	0	0	0
ENSG00000116157	2	62	12	39	6	12	10	22
ENSG00000182183	6	8	0	46	9	4	2	14
ENSG00000162377	420	891	558	1090	368	1182	500	1042
ENSG00000233664	0	0	0	0	0	0	2	0
ENSG00000239640	0	0	0	0	0	0	0	0
ENSG00000162378	1348	1336	2013	1387	1143	2052	1722	2259
ENSG00000252018	0	0	0	0	0	0	0	0
ENSG00000228929	10	68	6	28	4	18	12	40
ENSG00000206627	0	0	2	12	0	0	12	1
ENSG00000203995	1	0	8	0	0	0	0	1
ENSG00000242391	0	0	0	0	0	0	0	0
ENSG00000121310	222	344	928	582	498	846	603	791
ENSG00000230953	12	4	19	5	24	29	40	11
ENSG00000231866	0	0	0	0	0	0	0	0
ENSG00000116171	1087	1996	2246	2967	1292	4114	1980	3370
ENSG00000264834	0	0	0	0	0	0	0	0
ENSG00000266188	0	0	0	0	0	0	0	0
ENSG00000265815	2	0	0	0	0	0	0	0
ENSG00000237279	0	0	0	0	0	0	0	0
ENSG00000236360	0	0	1	1	0	0	0	0
ENSG00000226147	0	0	0	0	0	3	0	0
ENSG00000174348	0	0	0	0	6	9	2	6
ENSG00000232993	0	0	0	0	0	0	0	0
ENSG00000227644	0	0	0	0	0	0	0	0
ENSG00000162383	0	4	0	0	12	36	0	0
ENSG00000235563	0	0	0	0	0	0	0	0
ENSG00000277397	0	0	0	0	0	0	0	0
ENSG00000157184	1216	772	941	1000	935	933	1168	816
ENSG00000236723	2	0	0	1	6	0	11	0
ENSG00000162384	391	662	344	654	395	642	498	509
ENSG00000259818	0	0	0	0	0	0	0	2
ENSG00000162385	872	722	841	727	639	595	866	650
ENSG00000226754	5	10	8	0	4	4	19	0
ENSG00000157193	570	445	498	310	421	940	903	926
ENSG00000234578	0	0	0	0	0	0	0	0
ENSG00000228838	0	4	7	3	4	12	4	2
ENSG00000225030	0	0	0	0	0	0	0	0
ENSG00000232762	0	2	0	0	12	6	3	4
ENSG00000225675	0	0	0	0	4	0	2	0
ENSG00000226938	0	0	0	0	0	8	0	0
ENSG00000230138	1	6	0	2	0	0	0	6
ENSG00000236253	0	0	0	0	0	0	0	0
ENSG00000143006	0	0	0	0	0	0	0	0
ENSG00000174332	0	0	0	0	0	0	0	0
ENSG00000239007	0	0	0	0	0	0	0	0
ENSG00000058804	248	836	333	806	273	1426	393	1080
ENSG00000201003	0	0	0	0	0	0	0	6
ENSG00000229687	0	0	0	0	0	0	0	0
ENSG00000058799	2019	1536	1900	1379	1104	1147	1739	1514
ENSG00000211452	18	29	44	26	21	90	68	46
ENSG00000081870	366	404	575	493	265	534	633	547
ENSG00000116212	539	522	511	346	282	425	505	560
ENSG00000219102	0	12	4	6	10	6	12	4
ENSG00000203985	0	0	0	0	0	0	0	0
ENSG00000116209	5659	6345	5301	5906	3569	5797	4843	4960
ENSG00000280378	1	6	8	26	8	26	10	30
ENSG00000116205	476	730	623	835	299	705	475	464
ENSG00000283749	0	0	0	0	0	0	0	0
ENSG00000225183	0	28	6	0	0	0	0	2
ENSG00000279049	0	0	0	0	0	0	0	0
ENSG00000256407	0	0	0	0	0	0	0	0
ENSG00000157211	0	0	0	0	0	0	0	0
ENSG00000280425	0	0	0	0	0	2	0	0
ENSG00000215883	50	159	67	192	28	231	80	224
ENSG00000116221	1019	1593	672	1255	782	1620	1051	1465
ENSG00000157216	1604	2024	1578	2036	1499	2782	1922	2803
ENSG00000198711	20	24	51	54	43	86	44	57
ENSG00000225632	0	0	0	0	2	0	0	0
ENSG00000232245	0	0	0	0	0	0	0	0
ENSG00000235741	0	0	0	0	0	0	0	0
ENSG00000237173	0	0	2	0	0	0	8	1
ENSG00000227453	0	0	0	0	0	0	4	0
ENSG00000162390	847	1792	932	1904	480	1509	658	2140
ENSG00000162391	68	108	34	98	21	92	35	100
ENSG00000230728	0	0	2	10	8	0	0	2
ENSG00000184313	24	36	51	22	38	131	61	125
ENSG00000271723	0	0	2	0	0	2	5	4
ENSG00000243725	8	28	19	28	6	15	8	7
ENSG00000162396	311	286	188	336	182	262	192	250
ENSG00000006555	0	0	0	0	0	0	0	6
ENSG00000237453	0	0	0	0	0	0	0	0
ENSG00000162398	0	0	1	0	0	0	0	0
ENSG00000116133	1978	3138	1620	2365	2564	5620	3849	5119
ENSG00000242396	0	0	0	0	0	0	0	0
ENSG00000233203	0	0	0	4	0	0	0	4
ENSG00000143001	0	0	0	0	0	0	0	0
ENSG00000233271	0	0	0	0	0	0	0	0
ENSG00000162399	0	0	0	0	0	0	0	0
ENSG00000169174	0	0	0	0	18	18	10	0
ENSG00000162402	1527	1632	2060	2349	1471	3623	2867	3924
ENSG00000231090	0	0	0	0	0	0	0	0
ENSG00000231095	0	0	0	0	0	0	0	0
ENSG00000265822	0	0	0	0	0	0	0	0
ENSG00000231900	0	0	0	0	0	0	0	0
ENSG00000232198	0	0	0	0	0	0	0	0
ENSG00000199831	0	0	0	0	0	0	0	0
ENSG00000252162	0	0	0	0	0	0	0	0
ENSG00000272051	0	0	0	0	0	0	0	0
ENSG00000234810	0	0	0	0	0	0	0	0
ENSG00000230250	0	0	0	0	0	0	0	0
ENSG00000227104	0	0	0	0	0	0	0	0
ENSG00000233079	0	0	0	0	0	0	0	0
ENSG00000235612	0	0	0	0	0	0	0	0
ENSG00000229871	0	0	0	0	0	0	0	0
ENSG00000260971	0	0	0	0	0	0	0	0
ENSG00000223956	0	0	0	0	0	0	0	0
ENSG00000162407	144	0	144	0	144	110	144	44
ENSG00000236776	0	0	0	0	0	0	0	0
ENSG00000224980	0	0	0	0	0	0	0	0
ENSG00000225475	0	0	0	2	0	0	0	0
ENSG00000162409	0	2	0	0	0	0	0	0
ENSG00000187889	0	0	0	0	0	0	0	0
ENSG00000229913	0	0	0	0	0	0	0	0
ENSG00000157131	0	0	0	0	0	6	0	0
ENSG00000021852	0	0	0	0	0	0	0	0
ENSG00000236341	0	0	0	0	0	0	0	0
ENSG00000173406	2	34	5	16	14	74	23	120
ENSG00000227935	0	0	0	0	0	1	0	0
ENSG00000236888	0	0	0	2	0	0	0	2
ENSG00000226759	0	0	0	0	0	8	0	8
ENSG00000229887	0	0	2	12	0	0	6	0
ENSG00000223416	0	0	0	0	0	0	0	8
ENSG00000235038	0	0	6	0	1	2	0	0
ENSG00000230546	0	0	0	0	0	0	0	0
ENSG00000233216	0	0	0	0	0	2	0	0
ENSG00000162600	156	98	267	176	114	309	252	244
ENSG00000270209	0	0	0	0	0	0	0	0
ENSG00000264128	0	0	0	0	0	0	0	0
ENSG00000184292	10	10	4	2	86	294	82	146
ENSG00000185839	2	10	12	2	0	0	0	14
ENSG00000162601	622	336	2008	1702	552	2985	1506	2196
ENSG00000283445	1	0	0	0	0	4	0	0
ENSG00000177606	10628	2896	7290	2446	7194	6170	8262	6594
ENSG00000234807	0	4	0	13	8	46	20	16
ENSG00000272226	0	0	0	0	0	0	0	0
ENSG00000231740	0	0	1	0	0	0	0	0
ENSG00000232453	8	16	12	34	58	46	69	34
ENSG00000237352	28	0	13	14	26	11	34	11
ENSG00000228121	0	2	0	4	4	0	0	2
ENSG00000241042	0	0	5	0	0	0	0	1
ENSG00000235215	2	0	0	0	0	0	4	2
ENSG00000224609	0	0	0	0	0	0	0	0
ENSG00000270457	0	0	0	0	0	0	0	0
ENSG00000172456	264	139	276	236	266	203	346	148
ENSG00000266150	0	0	0	0	0	0	0	0
ENSG00000226883	0	0	0	0	0	0	0	0
ENSG00000134709	0	0	0	0	0	0	0	0
ENSG00000134716	0	0	0	0	0	0	0	0
ENSG00000265535	0	0	0	0	0	0	0	0
ENSG00000162598	0	0	0	0	0	0	0	0
ENSG00000229332	0	0	0	0	0	0	0	0
ENSG00000238242	0	0	0	0	0	0	0	0
ENSG00000226476	0	0	0	0	0	0	0	0
ENSG00000231252	0	0	0	0	0	2	2	0
ENSG00000162599	2	6	0	0	0	40	2	24
ENSG00000237928	0	0	0	0	0	0	0	0
ENSG00000270742	0	0	0	0	0	0	0	0
ENSG00000237853	0	0	0	0	0	0	0	0
ENSG00000223920	0	0	0	0	2	0	0	0
ENSG00000162604	661	463	703	695	428	789	761	763
ENSG00000271200	0	0	0	0	0	0	0	0
ENSG00000132849	0	6	0	2	12	14	0	16
ENSG00000200575	0	0	0	0	0	0	0	0
ENSG00000212360	0	0	0	0	0	0	0	0
ENSG00000236646	0	0	0	0	0	0	0	0
ENSG00000242860	0	0	0	0	0	0	0	0
ENSG00000263908	0	0	0	0	0	0	0	0
ENSG00000283690	0	0	0	0	0	0	0	0
ENSG00000234204	0	0	0	1	0	0	0	0
ENSG00000234088	0	0	0	0	0	0	0	0
ENSG00000240563	0	0	10	0	0	10	0	0
ENSG00000237227	0	0	0	0	0	0	0	0
ENSG00000200174	0	0	0	0	0	0	0	0
ENSG00000132854	0	6	10	0	32	188	123	48
ENSG00000201153	0	0	0	0	0	0	0	0
ENSG00000162607	295	208	913	490	330	1172	596	913
ENSG00000116641	761	804	1427	1168	785	2410	1826	2156
ENSG00000270549	0	0	2	0	0	0	0	4
ENSG00000132855	0	0	0	2	2	1	0	1
ENSG00000278967	0	4	0	0	4	2	6	0
ENSG00000213703	0	0	0	0	0	0	2	1
ENSG00000235545	0	6	19	0	16	5	24	32
ENSG00000125703	244	575	513	975	188	1341	303	1133
ENSG00000234318	0	0	0	0	0	2	0	0
ENSG00000237163	0	0	0	0	0	0	0	0
ENSG00000229537	0	0	0	0	0	0	0	0
ENSG00000227485	0	0	0	0	0	0	0	0
ENSG00000229225	0	0	0	0	0	0	0	0
ENSG00000203605	0	0	0	0	0	0	0	0
ENSG00000224209	0	0	14	0	0	0	0	0
ENSG00000252259	0	0	0	0	0	0	0	0
ENSG00000228734	0	0	0	0	0	0	0	0
ENSG00000223683	0	0	0	0	0	0	0	0
ENSG00000230798	4	0	0	0	0	0	12	0
ENSG00000187140	0	0	6	0	3	0	6	3
ENSG00000275836	0	0	0	0	0	0	0	0
ENSG00000252784	0	0	0	0	0	0	0	0
ENSG00000236674	0	0	0	0	0	0	0	0
ENSG00000088035	170	194	349	235	153	384	444	367
ENSG00000142856	54	35	92	97	53	195	75	95
ENSG00000203965	8	0	56	29	14	44	18	14
ENSG00000264271	0	0	0	0	0	0	0	0
ENSG00000251720	0	0	0	0	0	0	0	0
ENSG00000116652	0	0	4	0	8	8	2	2
ENSG00000276884	0	0	0	0	0	0	0	0
ENSG00000278287	0	0	0	0	0	0	0	0
ENSG00000277565	0	0	0	0	0	0	0	0
ENSG00000275823	0	0	0	0	0	0	0	0
ENSG00000277689	0	0	0	0	0	0	0	0
ENSG00000274199	0	0	0	0	0	0	0	0
ENSG00000079739	77	325	36	264	304	195	544	132
ENSG00000244256	0	0	0	0	0	0	0	0
ENSG00000185483	2	0	0	0	0	38	0	4
ENSG00000177452	0	0	0	0	0	0	0	0
ENSG00000228056	0	0	0	0	0	0	0	0
ENSG00000207190	0	0	0	0	0	0	0	0
ENSG00000200508	0	0	0	0	0	0	0	0
ENSG00000223949	0	0	0	0	4	6	2	0
ENSG00000177414	0	0	0	0	0	0	0	0
ENSG00000238653	0	0	0	0	0	0	0	0
ENSG00000158966	40	8	54	6	34	22	10	6
ENSG00000264470	0	0	0	0	0	0	0	0
ENSG00000162437	16	0	41	0	6	10	8	6
ENSG00000162434	15256	5429	14237	5421	6236	5603	9823	5519
ENSG00000234784	0	0	0	0	0	6	0	0
ENSG00000233877	0	2	0	2	4	0	4	10
ENSG00000226891	2	0	18	0	1	0	2	0
ENSG00000185031	0	0	8	0	0	0	0	0
ENSG00000272506	0	0	0	0	4	0	0	0
ENSG00000212257	0	0	0	0	0	0	0	0
ENSG00000265996	0	0	7	0	6	17	0	1
ENSG00000199135	0	0	0	0	3	0	0	0
ENSG00000231485	3	0	0	0	5	0	6	0
ENSG00000235804	0	0	0	0	0	0	0	0
ENSG00000234496	0	0	1	0	0	0	0	0
ENSG00000162433	2056	2	1330	0	1396	230	2388	70
ENSG00000231622	0	0	0	0	0	0	2	0
ENSG00000116675	154	16	88	0	56	26	44	16
ENSG00000229294	0	0	0	0	0	0	0	0
ENSG00000234144	0	0	0	0	0	0	0	0
ENSG00000222624	0	0	0	0	0	0	0	0
ENSG00000213625	4435	2687	4502	3140	3401	4352	5176	3983
ENSG00000116678	74	46	225	98	100	325	108	117
ENSG00000237852	19	0	0	0	2	0	0	0
ENSG00000224570	0	0	0	0	4	0	0	0
ENSG00000239319	0	0	0	0	0	0	0	0
ENSG00000184588	6281	697	7148	360	2491	682	4639	617
ENSG00000227466	0	0	6	0	0	2	0	5
ENSG00000223152	0	0	0	0	0	0	0	0
ENSG00000118473	42	12	47	20	0	14	1	6
ENSG00000264720	0	0	0	0	0	0	0	0
ENSG00000248458	0	0	2	0	0	4	0	0
ENSG00000152760	592	189	968	421	61	186	158	65
ENSG00000172410	0	0	0	0	0	0	0	0
ENSG00000152763	8	0	30	4	10	29	21	26
ENSG00000231080	0	0	0	0	0	0	0	0
ENSG00000198160	760	499	1855	1217	833	1655	1683	1522
ENSG00000116704	732	570	879	518	638	835	1186	680
ENSG00000203963	0	0	0	0	0	0	0	0
ENSG00000252433	0	0	0	0	0	0	0	0
ENSG00000275678	0	0	0	0	0	0	0	0
ENSG00000162594	4	0	4	0	2	30	22	14
ENSG00000253074	0	0	0	0	0	0	0	0
ENSG00000252116	0	0	0	0	0	0	0	0
ENSG00000228523	0	0	0	0	6	2	0	4
ENSG00000081985	6	0	16	6	4	4	40	0
ENSG00000142864	4611	7221	5204	9359	3545	10856	5139	9755
ENSG00000223263	0	4	1	2	4	0	12	0
ENSG00000235200	0	0	0	0	0	0	0	0
ENSG00000207504	0	0	0	0	0	0	0	0
ENSG00000238139	0	0	0	0	0	0	0	0
ENSG00000242482	0	0	0	0	0	0	0	0
ENSG00000232048	0	0	0	0	0	0	0	0
ENSG00000116717	906	384	1162	436	760	608	966	368
ENSG00000172380	380	788	322	1300	374	1552	662	1729
ENSG00000238778	0	0	0	0	0	0	0	4
ENSG00000232284	0	4	0	2	0	0	2	5
ENSG00000235055	0	0	0	0	0	0	0	0
ENSG00000162595	0	0	0	0	0	14	0	0
ENSG00000228431	0	0	0	0	0	0	0	0
ENSG00000116729	128	1015	68	567	40	154	24	146
ENSG00000234383	12	6	4	4	0	0	2	0
ENSG00000221203	0	0	0	0	0	0	0	0
ENSG00000229133	2	14	6	0	0	8	0	6
ENSG00000225242	0	0	0	0	0	0	0	0
ENSG00000237622	0	0	0	0	0	0	0	0
ENSG00000229440	0	0	0	0	0	0	0	0
ENSG00000116745	0	0	0	0	0	0	0	0
ENSG00000024526	0	8	2	60	0	148	10	62
ENSG00000233589	0	0	0	0	0	0	0	0
ENSG00000234264	0	4	0	0	0	0	0	0
ENSG00000225167	0	0	0	0	0	0	0	0
ENSG00000223883	0	0	0	0	0	0	0	0
ENSG00000235446	0	0	0	0	0	0	0	0
ENSG00000229639	0	0	0	0	0	0	0	0
ENSG00000033122	6	64	24	137	6	64	26	27
ENSG00000270615	0	0	0	0	0	0	0	0
ENSG00000240692	0	0	0	0	0	0	0	0
ENSG00000229359	0	0	0	0	0	0	0	0
ENSG00000237919	0	0	0	1	0	2	0	0
ENSG00000066557	116	42	529	329	221	679	384	532
ENSG00000244389	0	0	0	0	0	0	12	0
ENSG00000116754	1907	1702	4054	3306	1580	5333	3734	4306
ENSG00000228988	0	0	0	0	0	12	4	0
ENSG00000118454	908	541	1094	861	540	923	969	1096
ENSG00000197568	226	150	243	144	75	69	120	88
ENSG00000226088	0	1	0	8	0	0	18	1
ENSG00000116761	50	26	26	44	22	34	54	4
ENSG00000278636	0	0	0	0	0	0	0	0
ENSG00000271992	0	0	0	0	0	0	2	0
ENSG00000233020	0	0	0	0	0	0	0	0
ENSG00000237033	0	0	2	0	0	0	0	0
ENSG00000229051	0	0	0	0	0	0	0	0
ENSG00000226208	0	0	0	0	0	0	0	0
ENSG00000050628	244	682	116	496	54	460	32	224
ENSG00000235782	0	0	0	0	0	0	0	0
ENSG00000269933	0	0	0	0	12	0	0	0
ENSG00000235079	0	0	6	0	18	8	0	6
ENSG00000132485	467	571	1515	1393	512	2310	1473	1929
ENSG00000207721	10	0	8	5	3	17	12	8
ENSG00000229956	12	12	20	10	0	6	7	4
ENSG00000226324	0	0	0	0	0	0	0	0
ENSG00000172260	0	12	0	0	2	20	0	2
ENSG00000231985	0	0	0	0	0	0	0	0
ENSG00000271618	0	0	0	0	0	0	0	0
ENSG00000228853	0	0	0	0	0	0	0	0
ENSG00000233994	0	8	16	12	0	8	26	2
ENSG00000227207	0	0	0	0	0	0	0	0
ENSG00000212366	0	0	0	0	0	0	0	0
ENSG00000225087	0	0	0	0	0	0	0	0
ENSG00000227016	0	0	0	0	0	0	0	0
ENSG00000280317	0	0	0	0	0	0	0	0
ENSG00000229636	0	0	0	0	0	0	0	0
ENSG00000251825	0	0	0	0	0	0	0	0
ENSG00000233973	0	0	4	0	0	0	0	0
ENSG00000223479	0	0	0	0	0	0	0	0
ENSG00000200601	0	0	0	0	0	0	0	0
ENSG00000252005	0	0	0	0	0	0	0	0
ENSG00000162620	26	4	10	12	0	0	4	2
ENSG00000254685	225	149	432	275	181	479	263	363
ENSG00000259030	6	0	16	10	5	18	0	0
ENSG00000116783	0	0	0	1	0	0	0	0
ENSG00000237324	0	0	0	0	0	0	0	0
ENSG00000233894	0	0	0	0	0	0	0	0
ENSG00000162621	0	0	0	0	0	0	0	0
ENSG00000178965	0	0	0	0	10	34	8	6
ENSG00000234497	0	0	0	0	0	0	0	0
ENSG00000272864	0	6	0	6	0	0	0	0
ENSG00000116791	460	479	754	799	288	547	497	474
ENSG00000162623	226	220	357	376	126	625	177	363
ENSG00000229943	0	0	0	0	0	0	0	0
ENSG00000261213	0	0	0	0	0	0	0	0
ENSG00000224127	0	0	0	0	0	0	0	0
ENSG00000162624	0	2	6	6	0	0	0	0
ENSG00000224149	0	0	0	0	0	0	0	0
ENSG00000206999	0	0	0	0	0	0	0	0
ENSG00000137968	0	0	1	0	0	37	6	4
ENSG00000224493	0	0	0	0	0	0	0	0
ENSG00000252338	0	0	0	0	0	0	0	0
ENSG00000213579	0	0	0	0	0	0	0	0
ENSG00000230863	0	0	2	0	0	8	0	4
ENSG00000178193	6	0	0	0	0	0	0	0
ENSG00000117054	363	525	979	2112	577	2920	1194	1998
ENSG00000181227	16	12	10	49	14	40	18	22
ENSG00000137955	391	580	845	1335	406	2198	1044	2241
ENSG00000206620	0	0	0	0	0	0	0	0
ENSG00000207241	0	0	0	0	0	0	0	0
ENSG00000201487	0	0	0	0	0	0	0	0
ENSG00000057468	10	0	6	10	2	15	0	2
ENSG00000154007	0	0	0	0	0	0	0	0
ENSG00000225605	0	0	0	0	0	0	0	0
ENSG00000230027	0	0	0	0	0	0	0	0
ENSG00000184005	0	0	0	6	0	18	0	2
ENSG00000223905	0	0	0	0	0	0	0	0
ENSG00000272855	0	0	0	0	0	0	0	0
ENSG00000226415	64	68	75	76	103	57	144	60
ENSG00000199921	0	0	0	0	0	0	0	0
ENSG00000237552	0	0	0	0	0	0	0	0
ENSG00000117069	0	0	0	0	12	76	0	4
ENSG00000276081	0	0	0	0	0	0	0	0
ENSG00000230498	0	0	0	0	0	0	0	0
ENSG00000142892	230	308	438	310	318	822	436	726
ENSG00000226084	10	48	12	32	22	48	32	40
ENSG00000228187	0	0	0	0	2	6	0	0
ENSG00000154027	0	2	0	3	90	171	202	66
ENSG00000233099	0	0	0	0	0	0	0	0
ENSG00000251767	0	0	0	0	0	0	0	0
ENSG00000036549	274	210	551	667	208	1197	450	913
ENSG00000251785	0	0	5	0	0	4	0	0
ENSG00000243437	0	0	0	0	0	0	0	0
ENSG00000077254	1987	1448	2915	2367	1284	2559	2262	2511
ENSG00000232672	0	0	0	0	0	0	0	0
ENSG00000180488	257	162	497	471	298	621	634	665
ENSG00000222849	0	0	0	0	0	0	0	0
ENSG00000219201	16	22	54	26	36	44	32	37
ENSG00000235613	0	1	2	4	2	5	8	4
ENSG00000232015	0	0	0	0	0	0	0	0
ENSG00000235927	0	0	14	4	0	18	8	0
ENSG00000162614	4	0	22	10	22	78	12	10
ENSG00000162613	3344	1630	3039	2089	1876	2869	3180	2945
ENSG00000162616	298	88	984	177	305	482	419	472
ENSG00000137960	0	4	2	0	0	6	0	0
ENSG00000273338	0	0	6	0	2	2	0	4
ENSG00000213561	0	0	0	0	0	0	0	0
ENSG00000251958	0	0	0	0	0	0	0	0
ENSG00000213560	0	4	0	0	0	0	0	0
ENSG00000202263	0	0	0	0	0	0	0	0
ENSG00000233333	0	0	0	0	0	0	0	0
ENSG00000237413	10	0	3	0	4	9	8	0
ENSG00000122420	10	0	7	0	30	62	14	11
ENSG00000227556	0	0	0	0	0	0	0	0
ENSG00000212308	0	0	0	0	0	0	0	0
ENSG00000137959	2835	0	7573	58	1243	288	1080	145
ENSG00000137965	1019	36	2939	366	723	574	750	445
ENSG00000238015	0	0	4	0	2	0	0	0
ENSG00000235400	0	0	0	2	0	0	2	0
ENSG00000162618	24	0	16	12	0	0	0	0
ENSG00000230787	0	0	0	0	0	0	0	0
ENSG00000282898	0	0	0	0	0	0	0	0
ENSG00000235011	0	0	0	0	0	0	0	0
ENSG00000232676	0	0	0	0	0	0	0	0
ENSG00000235756	0	0	0	0	0	0	0	0
ENSG00000260322	0	0	0	0	0	0	0	0
ENSG00000277670	0	0	0	0	0	0	0	0
ENSG00000236407	0	0	0	0	0	0	0	0
ENSG00000225598	0	0	0	0	0	0	0	0
ENSG00000213559	0	0	0	0	0	0	0	0
ENSG00000227062	0	0	0	0	0	0	0	0
[truncated: 56,234 more rows]

## Sheet: Table-S1-B_deseq2-output
	baseMean	log2FoldChange	lfcSE	stat	pvalue	padj
ENSG00000227232	169.893	-0.158823	0.293247	-0.541601	0.588094	0.768256
ENSG00000278267	21.0186	0.0812109	0.477274	0.170156	0.864887	0.93764
ENSG00000233750	6.23805	-0.125545	1.70352	-0.0736973	0.941251	0.975429
ENSG00000268903	92.9962	-1.08423	0.672585	-1.61204	0.106953	0.24981
ENSG00000269981	107.403	-1.09013	0.608003	-1.79297	0.0729771	0.187716
ENSG00000241860	40.2118	-2.12228	0.601902	-3.52597	0.000421943	0.00259171
ENSG00000279457	195.09	-0.566358	0.200234	-2.82848	0.00467691	0.0202458
ENSG00000228463	7.0131	-0.351565	0.948738	-0.37056	0.710965	0.853597
ENSG00000237094	33.7397	-0.393191	0.617708	-0.636531	0.52443	0.719376
ENSG00000225972	58.5605	-0.577872	0.403813	-1.43104	0.152419	0.324025
ENSG00000225630	173.196	0.448638	0.205119	2.18721	0.0287271	0.0909471
ENSG00000237973	1868.79	-0.212312	0.242532	-0.875397	0.381358	0.59935
ENSG00000229344	199.037	0.0166953	0.280395	0.0595421	0.95252	0.98069
ENSG00000248527	5567.19	0.311971	0.202956	1.53713	0.124261	0.279033
ENSG00000198744	149.449	0.400106	0.443192	0.902784	0.366641	0.584201
ENSG00000228327	167.774	-0.604025	0.34184	-1.76698	0.0772308	0.195961
ENSG00000237491	42.5363	0.0224895	0.658022	0.0341775	0.972736	0.989709
ENSG00000230092	15.0753	-0.0660119	0.736548	-0.0896235	0.928586	0.970467
ENSG00000177757	15.4594	0.3079	0.580487	0.530417	0.595823	0.7743
ENSG00000228794	614.934	0.729883	0.263615	2.76874	0.00562731	0.0236218
ENSG00000225880	23.5676	0.344517	0.498152	0.691591	0.489194	0.692719
ENSG00000230699	4.62539	-0.941504	2.42588	-0.388108	0.697936	0.845669
ENSG00000223764	5.04321	1.7266	1.73583	0.994679	0.319892	0.534826
ENSG00000187634	5.27841	4.0404	1.55972	2.59046	0.00958484	0.0369749
ENSG00000188976	2281.86	0.42328	0.221488	1.91107	0.0559951	0.153417
ENSG00000187961	234.717	-0.475268	0.331466	-1.43384	0.151618	0.322912
ENSG00000187583	36.3609	-1.0446	0.559212	-1.86798	0.0617645	0.164891
ENSG00000187642	9.36143	-0.753814	1.01637	-0.741671	0.458287	0.668227
ENSG00000188290	22.2143	-1.80314	1.12393	-1.60432	0.108644	0.252539
ENSG00000187608	4164.78	-3.76856	0.366041	-10.2955	7.38724e-25	9.32063e-23
ENSG00000188157	4218.86	-1.89383	0.461697	-4.10188	4.09804e-05	0.00033297
ENSG00000217801	153.952	-3.16815	0.70017	-4.52483	6.04435e-06	5.94206e-05
ENSG00000273443	23.9137	-3.13244	1.06337	-2.94576	0.00322165	0.0147638
ENSG00000131591	316.806	-0.398682	0.252433	-1.57936	0.114255	0.262165
ENSG00000186891	118.925	-1.54323	0.585532	-2.63561	0.00839858	0.0330791
ENSG00000186827	208.406	-2.05511	0.614114	-3.34646	0.000818491	0.00462318
ENSG00000078808	7627.87	-0.340004	0.19741	-1.72233	0.0850098	0.210465
ENSG00000176022	953.458	0.23335	0.265581	0.87864	0.379597	0.597491
ENSG00000184163	12.5359	-0.197184	0.925082	-0.213153	0.831208	0.919896
ENSG00000160087	1913.81	-0.211211	0.230241	-0.917347	0.358961	0.576696
ENSG00000230415	5.9853	0.299755	1.05327	0.284594	0.775955	0.890263
ENSG00000162572	19.9349	0.0433486	0.673799	0.0643347	0.948704	0.97905
ENSG00000131584	910.29	0.404768	0.248369	1.6297	0.103165	0.243505
ENSG00000169972	312.043	0.517627	0.313886	1.64909	0.0991289	0.236194
ENSG00000127054	1849.09	0.0394725	0.145511	0.271269	0.786184	0.896369
ENSG00000240731	31.2559	-0.0651173	0.413959	-0.157304	0.875005	0.942573
ENSG00000224051	781.572	-0.0480746	0.231785	-0.20741	0.83569	0.922304
ENSG00000169962	15.6447	-0.155332	0.90734	-0.171195	0.86407	0.937117
ENSG00000107404	985.33	0.0461947	0.262064	0.176273	0.86008	0.934952
ENSG00000162576	150.498	0.989511	0.595149	1.66263	0.0963872	0.231014
ENSG00000175756	2470.04	0.0210717	0.245026	0.0859978	0.931468	0.971932
ENSG00000221978	2554.15	-0.000667094	0.165812	-0.00402319	0.99679	0.998696
ENSG00000224870	607.204	0.246744	0.273283	0.902887	0.366586	0.584201
ENSG00000242485	1291.68	0.383854	0.184265	2.08316	0.0372368	0.111558
ENSG00000272455	28.9314	-0.168429	0.522749	-0.322199	0.747302	0.87321
ENSG00000225285	4.57173	-1.34099	1.74514	-0.768414	0.442241	0.654855
ENSG00000179403	269.943	0.0386638	0.604945	0.063913	0.94904	0.979091
ENSG00000160072	972.737	0.72864	0.246803	2.95231	0.00315405	0.0145265
ENSG00000197785	989.388	1.12508	0.222015	5.06758	4.02899e-07	5.1358e-06
ENSG00000205090	5.16493	-1.39126	1.47673	-0.94212	0.346131	0.563679
ENSG00000160075	2917.17	-0.114788	0.214832	-0.534317	0.593122	0.77231
ENSG00000215014	52.3222	-0.741352	0.372969	-1.9877	0.0468444	0.133478
ENSG00000228594	366.398	1.16919	0.239617	4.87942	1.06399e-06	1.2373e-05
ENSG00000272106	81.1039	-0.509187	0.355729	-1.43139	0.152319	0.323919
ENSG00000197530	721.527	-0.161735	0.204602	-0.790486	0.429244	0.643525
ENSG00000248333	1456.09	-0.563711	0.232859	-2.42083	0.015485	0.0550112
ENSG00000189339	1887.27	-0.267273	0.152676	-1.75059	0.0800164	0.201148
ENSG00000269737	43.6646	-1.11756	0.45672	-2.44691	0.0144085	0.0518564
ENSG00000008128	30.0905	-0.528724	0.447731	-1.18089	0.237645	0.437541
ENSG00000268575	43.1231	0.04948	0.567913	0.0871261	0.930571	0.971251
ENSG00000227775	204.779	-0.214585	0.414537	-0.517648	0.604704	0.780516
ENSG00000215790	150.498	-0.406445	0.205385	-1.97895	0.0478222	0.135543
ENSG00000008130	6516.95	-1.09383	0.242411	-4.51228	6.41358e-06	6.25537e-05
ENSG00000078369	18014.7	-0.340747	0.169151	-2.01445	0.043962	0.127038
ENSG00000231050	6.26094	1.2831	0.951819	1.34805	0.177642	0.361359
ENSG00000067606	27.5959	0.498307	0.712263	0.699611	0.48417	0.688865
ENSG00000182873	9.00871	-2.26293	1.46704	-1.54251	0.122949	0.276792
ENSG00000162585	823.864	0.121621	0.236605	0.514026	0.607234	0.7821
ENSG00000157933	7206.72	0.948431	0.305591	3.1036	0.00191182	0.00950108
ENSG00000116151	94.0486	0.129423	0.37657	0.343689	0.73108	0.864211
ENSG00000269896	11.5525	0.0847045	0.68477	0.123698	0.901555	0.957017
ENSG00000157916	3879.55	-0.260073	0.172293	-1.50948	0.131177	0.290203
ENSG00000157911	330.243	0.386245	0.268045	1.44097	0.149592	0.319765
ENSG00000149527	14.2026	1.43522	1.07556	1.33439	0.182078	0.367251
ENSG00000157881	952.334	-0.333285	0.176624	-1.88698	0.0591636	0.159909
ENSG00000272449	25.3003	-0.434771	0.515133	-0.843998	0.39867	0.615435
ENSG00000238164	61.5473	-0.0920269	0.410264	-0.224312	0.822515	0.915605
ENSG00000157873	2437.77	0.0578245	0.187901	0.307739	0.758281	0.87899
ENSG00000225931	13.0985	-0.778593	0.71342	-1.09135	0.275118	0.483595
ENSG00000228037	5.45929	-0.248385	1.14584	-0.21677	0.828388	0.918751
ENSG00000157870	1325.84	0.178926	0.261536	0.684136	0.493889	0.696529
ENSG00000215912	15.3473	-0.00344476	0.796741	-0.00432357	0.99655	0.998668
ENSG00000130762	74.6055	0.661686	0.83938	0.788303	0.430519	0.644844
ENSG00000162591	318.317	0.647537	1.34433	0.481682	0.630032	0.798688
ENSG00000238260	4.06728	-0.228531	1.50053	-0.1523	0.87895	0.944348
ENSG00000158109	2474.11	0.0735011	0.261831	0.28072	0.778925	0.891892
ENSG00000116213	498.627	-0.534288	0.14541	-3.67436	0.000238442	0.00157706
ENSG00000078900	9.84652	1.65308	1.0213	1.6186	0.105533	0.247485
ENSG00000227372	684.293	-0.417759	0.181057	-2.30733	0.0210362	0.0705445
ENSG00000235169	29.3517	0.524947	0.501075	1.04764	0.294804	0.506428
ENSG00000130764	1357.17	-0.000352172	0.222396	-0.00158353	0.998737	0.999493
ENSG00000272153	24.0686	0.389045	0.510346	0.762316	0.445871	0.65775
ENSG00000116198	1216.43	-0.206762	0.288769	-0.716013	0.473984	0.680767
ENSG00000169598	240.021	0.192125	0.253464	0.757999	0.448452	0.659609
ENSG00000198912	698.026	0.273675	0.148939	1.8375	0.0661366	0.17403
ENSG00000236423	52.6405	-0.264367	0.395966	-0.667652	0.504356	0.703429
ENSG00000196581	11.5677	-1.03874	1.16167	-0.894175	0.371228	0.588847
ENSG00000131697	517.966	0.0749706	0.213281	0.35151	0.725206	0.861671
ENSG00000069424	11034.8	2.01241	0.296589	6.78516	1.15955e-11	3.30021e-10
ENSG00000116254	3.92355	-0.437283	1.6746	-0.261126	0.793995	0.899991
ENSG00000116251	5706.12	1.39731	0.22818	6.12371	9.14217e-10	1.92248e-08
ENSG00000158286	238.422	-0.0980539	1.08757	-0.0901588	0.928161	0.970388
ENSG00000116237	2693.56	0.488291	0.156401	3.12204	0.00179603	0.00900472
ENSG00000225077	15.9726	-0.973336	0.83612	-1.16411	0.244379	0.445615
ENSG00000158292	117.731	0.223097	0.523211	0.4264	0.669816	0.826073
ENSG00000097021	517.084	0.29136	0.353927	0.823221	0.410382	0.626002
ENSG00000069812	16.3934	0.888763	1.57701	0.563576	0.573043	0.755803
ENSG00000187017	28.9769	4.2256	1.01572	4.16019	3.17989e-05	0.00026567
ENSG00000215788	1090.95	3.53247	0.425603	8.29991	1.04194e-16	5.86356e-15
ENSG00000171680	5655.37	4.00454	0.467511	8.56566	1.07461e-17	6.63144e-16
ENSG00000162408	850.834	0.679523	0.216575	3.13759	0.00170346	0.00860372
ENSG00000229519	11.7393	-0.375938	0.826492	-0.45486	0.64921	0.810661
ENSG00000204859	1660.56	-0.274227	0.183771	-1.49222	0.135641	0.297423
ENSG00000162413	2346.69	0.243645	0.244299	0.997321	0.318609	0.533817
ENSG00000116273	648.37	-0.684167	0.172712	-3.96131	7.45398e-05	0.000565948
ENSG00000041988	327.886	-0.243449	0.253793	-0.959245	0.337435	0.554775
ENSG00000007923	1555.53	0.722881	0.181369	3.9857	6.72827e-05	0.00051639
ENSG00000171735	1032.63	-0.128858	0.221204	-0.582529	0.56021	0.747085
ENSG00000049245	3670.09	-0.084364	0.128631	-0.655862	0.511913	0.709832
ENSG00000269925	19.1959	0.498023	0.67208	0.741018	0.458683	0.668436
ENSG00000049246	578.465	3.24565	0.272579	11.9072	1.08551e-32	2.55986e-30
ENSG00000049247	6.09173	1.22057	1.96945	0.619751	0.535422	0.728483
ENSG00000049249	1254.74	-2.12743	0.64311	-3.30804	0.000939515	0.00519131
ENSG00000116288	5239.15	0.695016	0.261447	2.65834	0.00785264	0.0312734
ENSG00000116285	637.407	0.863342	0.380039	2.27172	0.0231032	0.0761409
ENSG00000162426	9.91423	0.500765	0.874422	0.572682	0.56686	0.751419
ENSG00000142599	2629.54	0.477078	0.212488	2.2452	0.0247551	0.0806669
ENSG00000232912	5.51076	-1.35056	1.3598	-0.993208	0.320608	0.535328
ENSG00000074800	48386.3	-0.107282	0.25195	-0.425808	0.670248	0.826431
ENSG00000236269	12.5621	-0.816578	0.824828	-0.989997	0.322175	0.537248
ENSG00000142583	279.267	0.850755	0.730713	1.16428	0.24431	0.445615
ENSG00000180758	538.176	-2.0358	0.361062	-5.63836	1.71676e-08	2.85536e-07
ENSG00000228526	415.569	-0.336423	0.265333	-1.26793	0.204823	0.39669
ENSG00000234546	12.3749	-0.119947	0.692501	-0.173208	0.862488	0.93622
ENSG00000049239	3920.46	-1.35673	0.256347	-5.29256	1.20617e-07	1.68855e-06
ENSG00000171621	567.189	-1.16059	0.457898	-2.53461	0.0112573	0.0423645
ENSG00000171612	585.182	-0.0912881	0.26078	-0.350058	0.726295	0.862326
ENSG00000231181	13.2858	-0.766477	0.77348	-0.990946	0.321712	0.536701
ENSG00000188807	365.832	1.42634	0.28535	4.99856	5.77613e-07	7.13337e-06
ENSG00000171608	5227.09	-0.418764	0.207859	-2.01466	0.0439408	0.127013
ENSG00000179840	29.5735	-0.9071	0.549047	-1.65214	0.0985065	0.235183
ENSG00000231789	13.0162	-0.110246	1.03982	-0.106024	0.915563	0.964168
ENSG00000171603	3584.64	0.0829736	0.383429	0.216399	0.828677	0.918855
ENSG00000178585	617.473	1.31698	0.31776	4.14458	3.40433e-05	0.000282279
ENSG00000162441	771.919	0.795735	0.140457	5.66535	1.46729e-08	2.47366e-07
ENSG00000228150	14.8058	-0.528974	0.494977	-1.06868	0.285212	0.495159
ENSG00000173614	970.756	0.0605374	0.232632	0.260228	0.794688	0.900212
ENSG00000202415	6.40138	-1.71682	1.13759	-1.50916	0.131257	0.290316
ENSG00000283611	5.39315	-0.363313	1.70587	-0.212979	0.831344	0.919953
ENSG00000162444	202.313	4.82767	1.06266	4.543	5.5459e-06	5.50119e-05
ENSG00000130939	2573.99	0.261133	0.13383	1.95124	0.051029	0.142552
ENSG00000054523	5311.37	-0.460485	0.194274	-2.37028	0.0177745	0.0614906
ENSG00000142657	38127.1	-1.17571	0.245037	-4.79809	1.60188e-06	1.79174e-05
ENSG00000175279	10.4984	-0.625981	0.589465	-1.06195	0.288259	0.498919
ENSG00000241563	4.55614	0.046126	1.26872	0.0363563	0.970998	0.988824
ENSG00000160049	1499.2	0.578207	0.234196	2.4689	0.0135529	0.0493783
ENSG00000142655	1197.95	-0.392851	0.288668	-1.36091	0.173543	0.355871
ENSG00000130940	57.7962	-2.61771	0.682457	-3.83571	0.000125202	0.000896973
ENSG00000272078	5.67176	-2.12379	1.34773	-1.57583	0.115064	0.263321
ENSG00000175262	232.125	2.61323	0.405698	6.44133	1.18434e-10	2.8437e-09
ENSG00000120948	2141.43	0.0752312	0.132295	0.568663	0.569585	0.753399
ENSG00000009724	47.5748	0.654849	0.547144	1.19685	0.231365	0.43046
ENSG00000271895	15.4693	0.774195	0.620547	1.2476	0.212178	0.406365
ENSG00000116649	890.709	1.43455	0.334025	4.29473	1.74905e-05	0.000155089
ENSG00000171824	1587.95	-0.320867	0.146395	-2.19179	0.028395	0.0900972
ENSG00000230337	6.07193	-0.1814	1.02676	-0.176671	0.859767	0.934952
ENSG00000198793	3673.05	0.0251094	0.175071	0.143424	0.885955	0.947478
ENSG00000171819	4.88026	-0.567122	1.5241	-0.372103	0.709816	0.852683
ENSG00000120942	713.456	0.279229	0.226564	1.23245	0.217781	0.413647
ENSG00000116661	48.9083	-3.9351	0.95207	-4.13321	3.57735e-05	0.000294704
ENSG00000132879	389.814	-1.14112	0.309718	-3.68438	0.000229259	0.00152498
ENSG00000116663	1148.05	-2.88361	0.324012	-8.89972	5.59895e-19	4.00395e-17
ENSG00000116670	715.756	-1.62147	0.291614	-5.56033	2.69265e-08	4.29113e-07
ENSG00000162490	41.0559	-0.787622	1.70273	-0.462564	0.643677	0.807444
ENSG00000177674	1706.63	-1.66697	0.279945	-5.95462	2.60673e-09	5.06241e-08
ENSG00000177000	2080.29	-0.0482858	0.190851	-0.253003	0.800266	0.903138
ENSG00000011021	881.826	0.032205	0.201307	0.15998	0.872897	0.941531
ENSG00000242349	3.97348	0.962281	1.01524	0.947838	0.343212	0.560681
ENSG00000175206	5.8046	0.977715	1.25015	0.782079	0.434168	0.647512
ENSG00000120937	35.2419	4.86229	3.20442	1.51737	0.129174	0.287155
ENSG00000116685	2775.19	-0.117706	0.197394	-0.596301	0.550974	0.740552
ENSG00000083444	6588.34	0.274969	0.12105	2.27153	0.0231152	0.0761624
ENSG00000116688	7425.73	0.460045	0.224697	2.0474	0.0406185	0.119325
ENSG00000116691	1167.29	-0.0753067	0.221394	-0.340148	0.733745	0.865826
ENSG00000202461	5.70703	0.616039	1.34532	0.457913	0.647015	0.809699
ENSG00000120949	298.644	-1.51126	0.447747	-3.37524	0.000737506	0.00422233
ENSG00000028137	36217.9	-2.49954	0.380129	-6.57551	4.84864e-11	1.2588e-09
ENSG00000048707	3777.84	0.199735	0.158181	1.2627	0.206696	0.398922
ENSG00000239149	4.81399	-0.462448	1.05719	-0.437431	0.661799	0.819912
ENSG00000162496	1776.23	0.334821	0.273538	1.22404	0.220937	0.417608
ENSG00000272482	30.6307	-0.280882	0.587166	-0.478369	0.632388	0.800212
ENSG00000179172	5.10477	0.777911	1.55181	0.501292	0.616165	0.788918
ENSG00000162493	1097.61	-1.51588	0.49045	-3.09079	0.00199623	0.00983877
ENSG00000116731	2143.66	-0.536829	0.0923776	-5.81124	6.20101e-09	1.1259e-07
ENSG00000189337	72.6907	1.01429	0.802089	1.26456	0.206031	0.398094
ENSG00000175147	133.324	-0.160501	0.336283	-0.477281	0.633162	0.800405
ENSG00000171729	3159.83	0.0191851	0.259998	0.0737894	0.941178	0.975429
ENSG00000204464	15.451	-0.416628	0.705031	-0.590935	0.554564	0.742964
ENSG00000215720	11.2384	-0.310185	0.889465	-0.348732	0.727291	0.862792
ENSG00000278480	7.5136	-0.238158	0.987739	-0.241114	0.809467	0.908412
ENSG00000142621	323.353	1.0034	0.346563	2.8953	0.00378799	0.0169123
ENSG00000236045	4.42271	0.573299	1.37344	0.41742	0.676371	0.830229
ENSG00000228140	17.217	-0.0571799	0.720762	-0.0793325	0.936768	0.973835
ENSG00000142634	15941.7	-0.615192	0.243133	-2.53027	0.0113974	0.0427922
ENSG00000215704	4.34339	-0.870533	1.82341	-0.47742	0.633063	0.800405
ENSG00000132906	809.426	-0.684914	0.151701	-4.5149	6.33464e-06	6.18752e-05
ENSG00000116138	932.367	-0.43468	0.101535	-4.28108	1.85991e-05	0.000163892
ENSG00000116771	16.0038	0.275673	0.947767	0.290866	0.771154	0.887147
ENSG00000235084	7.32949	1.69523	0.914133	1.85447	0.0636715	0.168822
ENSG00000197312	1602.78	0.713183	0.304452	2.34251	0.0191543	0.0652722
ENSG00000116786	7709.38	-0.678255	0.23211	-2.92213	0.00347642	0.0157368
ENSG00000237938	66.2623	-0.252954	0.375464	-0.67371	0.500496	0.701105
ENSG00000162461	64.2115	-1.35121	0.416408	-3.24493	0.00117481	0.00627879
ENSG00000162458	66.4899	-0.308104	0.92014	-0.334845	0.737742	0.867778
ENSG00000224321	5.1519	-2.27315	1.20581	-1.88517	0.0594072	0.16037
ENSG00000233954	100.73	1.50887	0.311584	4.84259	1.28161e-06	1.46072e-05
ENSG00000178715	11.2051	0.605072	0.713551	0.847973	0.396453	0.613494
ENSG00000179743	86.8962	-0.546257	0.310015	-1.76204	0.0780634	0.197592
ENSG00000065526	5610.48	-0.334216	0.143604	-2.32735	0.0199466	0.0675884
ENSG00000116809	1333.11	-1.22941	0.152621	-8.05534	7.9257e-16	4.0464e-14
ENSG00000173641	224.703	0.269392	1.22527	0.219864	0.825977	0.917603
ENSG00000186510	24.515	-0.375825	1.02031	-0.368344	0.712617	0.854112
ENSG00000142627	283.806	0.277042	0.385759	0.718176	0.472649	0.679639
ENSG00000224621	7.17799	0.497232	1.44964	0.343005	0.731595	0.864486
ENSG00000142632	107.651	0.737423	0.242596	3.03971	0.00236805	0.0113691
ENSG00000237276	59.2553	-1.85511	0.483822	-3.83428	0.000125931	0.000899918
ENSG00000132881	135.942	-0.00261134	0.29533	-0.0088421	0.992945	0.998202
ENSG00000233929	36.5882	-4.56782	0.838609	-5.4469	5.12552e-08	7.69854e-07
ENSG00000037637	1914.27	-0.271295	0.189057	-1.43499	0.15129	0.322427
ENSG00000055070	6022.2	-0.411289	0.197356	-2.084	0.0371602	0.111404
ENSG00000187144	4.77414	-5.59792	1.84858	-3.02822	0.00245997	0.0117336
ENSG00000157191	5726.39	-0.755916	0.137745	-5.48778	4.07014e-08	6.20195e-07
ENSG00000226029	57.0087	0.131906	0.513576	0.256838	0.797304	0.901523
ENSG00000080947	107.768	-0.375616	0.444333	-0.845348	0.397916	0.61475
ENSG00000219481	593.101	-0.0331347	0.204232	-0.162241	0.871116	0.940888
ENSG00000215908	756.302	-0.605307	0.263956	-2.29321	0.0218358	0.0727822
ENSG00000186301	20.979	-1.27872	0.950978	-1.34464	0.178741	0.362718
ENSG00000236698	61.5701	0.783084	0.368582	2.12458	0.0336213	0.10289
ENSG00000058453	254.636	0.414895	0.334216	1.2414	0.214458	0.409583
ENSG00000186715	4.06992	0.469066	1.50854	0.31094	0.755846	0.877549
ENSG00000238142	51.4709	0.156825	0.411847	0.380784	0.703364	0.848638
ENSG00000235241	4.77941	-1.05622	1.17139	-0.901682	0.367226	0.584757
ENSG00000117122	10.0272	1.21376	2.22333	0.54592	NA	NA
ENSG00000159363	615.035	-0.726466	0.208278	-3.48797	0.000486707	0.00293759
ENSG00000117118	2862.01	0.621337	0.210061	2.95788	0.00309759	0.0142997
ENSG00000117115	1957.2	1.91559	0.798058	2.40031	0.016381	0.0575644
ENSG00000159339	106.062	0.0386111	1.24995	0.0308902	0.975357	0.991118
ENSG00000179051	6338.4	0.910489	0.239185	3.80664	0.00014087	0.000994475
ENSG00000074964	4184.94	1.13176	0.212545	5.32481	1.0106e-07	1.43403e-06
ENSG00000117154	57.4146	0.715593	1.05525	0.678126	0.497692	0.698807
ENSG00000280222	24.4222	-0.578108	0.962228	-0.600802	0.547972	0.738373
ENSG00000159423	440.455	0.601072	0.263955	2.27718	0.0227757	0.0752442
ENSG00000169991	406.717	-0.31081	0.458176	-0.678363	0.497541	0.698736
ENSG00000272084	14.618	-1.25752	0.891325	-1.41085	0.15829	0.333252
ENSG00000127481	10701.1	-0.907585	0.117484	-7.7252	1.11678e-14	4.83021e-13
ENSG00000230424	8.4051	-1.4596	1.19756	-1.21882	0.222914	0.419956
ENSG00000127463	2220.07	0.376342	0.152787	2.46318	0.013771	0.050058
ENSG00000053372	1043.2	1.02762	0.26975	3.80955	0.000139222	0.000984595
ENSG00000211454	5.05798	0.637001	1.18578	0.537201	0.591129	0.770995
ENSG00000162482	10.6899	-0.565584	0.693416	-0.81565	0.414701	0.630037
ENSG00000270728	19.803	3.35655	0.685713	4.89498	9.83182e-07	1.14834e-05
ENSG00000053371	1162.77	0.92793	0.2824	3.28587	0.00101667	0.0055495
ENSG00000040487	1742.3	0.453815	0.243077	1.86696	0.0619075	0.165228
ENSG00000077549	21546.2	0.639933	0.243862	2.62416	0.00868632	0.0340256
ENSG00000173436	151.698	1.10183	0.271053	4.06499	4.80337e-05	0.000383824
ENSG00000226396	25.48	1.75063	0.453288	3.86207	0.000112432	0.00081343
ENSG00000158747	404.62	0.563952	0.300313	1.87788	0.0603976	0.162308
ENSG00000162542	514.685	0.521682	0.259544	2.01	0.0444314	0.128095
ENSG00000169914	278.379	0.697927	0.251189	2.77849	0.00546121	0.0230467
ENSG00000117215	34.2219	-2.86426	1.19576	-2.39534	0.0166049	0.0581966
ENSG00000227066	10.3338	-0.697463	1.76665	-0.394794	0.692995	0.841612
ENSG00000162545	4.13529	0.72294	2.46775	0.292955	0.769556	0.886184
ENSG00000090432	1915.14	0.0811509	0.25642	0.316476	0.751641	0.875416
ENSG00000158825	100.363	0.704608	0.574528	1.22641	0.220043	0.416516
ENSG00000158828	524.139	-0.290977	0.236517	-1.23026	0.2186	0.414496
ENSG00000117242	147.048	1.03964	0.391628	2.65467	0.00793867	0.0315334
ENSG00000244038	7934.24	0.448235	0.21179	2.11641	0.0343102	0.104574
ENSG00000117245	74.9956	1.41077	0.476799	2.95884	0.00308802	0.0142622
ENSG00000127483	4101.12	0.0725746	0.111885	0.648655	0.516561	0.713453
ENSG00000075151	3916.28	0.571487	0.117723	4.85452	1.2068e-06	1.38262e-05
ENSG00000117298	168.247	-0.820903	1.39925	-0.586674	0.557423	0.744772
ENSG00000187952	5.32259	-0.352742	1.0469	-0.336938	0.736164	0.867116
ENSG00000142794	5.83421	1.38025	1.61717	0.853496	0.393384	0.610733
ENSG00000162551	10.8531	-1.67399	1.52975	-1.09429	0.27383	0.482416
ENSG00000076864	151.522	0.455939	0.864743	0.527253	0.598018	0.775677
ENSG00000090686	1491.78	0.546937	0.207161	2.64015	0.00828682	0.0326804
ENSG00000142798	695.536	1.14894	0.923291	1.2444	0.213352	0.408093
ENSG00000218510	363.585	-0.231897	0.245838	-0.943292	0.345532	0.563067
ENSG00000070831	15741.9	-0.104673	0.154595	-0.677082	0.498354	0.699154
ENSG00000230068	7.57905	-2.33007	1.06263	-2.19274	0.028326	0.0899647
ENSG00000271428	5.23948	0.110012	1.30129	0.0845409	0.932626	0.972275
ENSG00000271840	8.05712	-1.49521	0.904356	-1.65334	0.0982616	0.234747
ENSG00000162552	11.0947	-0.402728	1.09164	-0.368922	0.712186	0.85408
ENSG00000184677	2141.71	-0.128656	0.16256	-0.791442	0.428686	0.643078
ENSG00000237200	4.6739	0.410586	1.35402	0.303234	0.761711	0.881419
ENSG00000173372	37855.3	0.184512	0.53348	0.345865	0.729444	0.863838
ENSG00000159189	67912.6	0.108291	0.408385	0.265168	0.79088	0.898529
ENSG00000173369	18855	-0.889951	0.401902	-2.21435	0.0268047	0.0860435
ENSG00000133216	4781.8	0.149597	0.298973	0.50037	0.616815	0.789257
ENSG00000004487	1538.47	0.287771	0.136184	2.11311	0.0345918	0.105258
ENSG00000169641	3720.36	-0.428095	0.173291	-2.47038	0.0134969	0.0492013
ENSG00000261326	43.4837	0.168707	0.63142	0.267187	0.789325	0.897884
ENSG00000125944	3570.63	0.48669	0.220357	2.20864	0.0271995	0.0871131
ENSG00000125945	356.159	-0.907532	0.238548	-3.8044	0.000142149	0.00100279
ENSG00000249087	20.4759	-0.98186	0.603078	-1.62808	0.103507	0.244045
ENSG00000088280	14.3222	-1.83544	1.76995	-1.037	0.299735	0.512026
ENSG00000007968	214.941	2.60489	0.554662	4.69636	2.64843e-06	2.83277e-05
ENSG00000117318	4353.52	1.04327	0.271654	3.84045	0.000122811	0.000882411
ENSG00000142676	12325.7	0.920346	0.284312	3.2371	0.0012075	0.00642823
ENSG00000011007	2929.37	-0.36437	0.176165	-2.06834	0.038608	0.114902
ENSG00000236810	17.0456	0.316665	0.700369	0.45214	0.651168	0.811984
ENSG00000057757	1509.08	-0.133609	0.253159	-0.527765	0.597662	0.775527
ENSG00000011009	3125.38	-0.227142	0.242384	-0.937118	0.348698	0.566177
ENSG00000117308	1720.32	-0.0264441	0.23685	-0.111649	0.911102	0.962527
ENSG00000117305	1818.68	-0.619745	0.202765	-3.05647	0.00223956	0.0108362
ENSG00000179163	69459.2	1.63513	0.424341	3.85333	0.000116524	0.000840272
ENSG00000188822	1043.54	1.07098	0.630299	1.69916	0.0892888	0.218361
ENSG00000229106	53.1882	1.46966	0.753742	1.94981	0.0511984	0.142843
ENSG00000232557	4.88646	1.75681	1.71409	1.02492	0.3054	0.518306
ENSG00000189266	2746.44	-0.375181	0.310934	-1.20663	0.227576	0.42565
ENSG00000188529	2393.65	0.300247	0.27437	1.09431	0.273818	0.482416
ENSG00000185436	379.575	-1.71811	0.432816	-3.96961	7.19889e-05	0.000548585
ENSG00000001460	67.8284	-1.23602	0.465139	-2.65732	0.00787654	0.0313495
ENSG00000001461	549.206	-0.494855	0.237636	-2.0824	0.0373055	0.111714
ENSG00000117602	455.533	-0.525992	0.283563	-1.85494	0.0636052	0.168714
ENSG00000133226	3693.46	0.312478	0.14688	2.12744	0.0333838	0.102353
ENSG00000169504	9616.91	-1.10394	0.212976	-5.18341	2.17868e-07	2.92593e-06
ENSG00000020633	6773.19	1.47777	0.362791	4.07334	4.6343e-05	0.000371965
ENSG00000229162	30.1609	0.958096	0.563404	1.70055	0.0890277	0.217776
ENSG00000261025	6.49723	5.42453	1.70457	3.18234	0.00146089	0.00756963
ENSG00000117614	1362.51	-0.503427	0.237998	-2.11525	0.0344083	0.104796
ENSG00000117616	2792.12	-0.597235	0.320389	-1.86409	0.0623084	0.166097
ENSG00000261349	5.19855	-2.65425	1.00928	-2.62983	0.00854266	0.033569
ENSG00000187010	26.4471	-2.66931	0.859312	-3.10633	0.00189423	0.00942546
ENSG00000224183	12.0262	-0.515426	0.774184	-0.665767	0.50556	0.704512
ENSG00000183726	6508.21	-1.03252	0.16847	-6.12884	8.85221e-10	1.86546e-08
ENSG00000238084	8.37081	-0.44669	0.689542	-0.647806	0.517111	0.713851
ENSG00000204178	1028.02	-0.568333	0.175559	-3.23728	0.00120673	0.00642585
ENSG00000157978	488.261	0.0282372	0.358843	0.0786896	0.93728	0.973907
ENSG00000117643	499.175	1.78076	0.418381	4.2563	2.07834e-05	0.000181365
ENSG00000162430	4321.03	1.0058	0.326207	3.0833	0.00204716	0.0100526
ENSG00000228172	13.9636	0.0255778	0.906225	0.0282246	0.977483	0.991878
ENSG00000117640	1123.39	0.0470991	0.203106	0.231894	0.81662	0.912427
ENSG00000127423	50.6462	1.43957	0.508631	2.83028	0.00465078	0.0201584
ENSG00000182749	231.328	1.25858	0.368839	3.41226	0.000644257	0.0037613
ENSG00000117632	1719.88	3.91938	0.326305	12.0114	3.09501e-33	7.56901e-31
ENSG00000158006	1414.76	0.2881	0.246932	1.16672	0.243324	0.444444
ENSG00000158008	249.718	1.70312	0.530584	3.20989	0.00132785	0.00698257
ENSG00000158014	160.465	-2.87581	0.472068	-6.09193	1.11555e-09	2.30668e-08
ENSG00000175087	311.508	1.26736	0.405588	3.12475	0.00177955	0.00893338
ENSG00000130695	845.946	0.343692	0.24099	1.42617	0.15382	0.326343
ENSG00000142669	13783.2	0.216768	0.250335	0.86591	0.386539	0.604195
ENSG00000158062	423.379	1.28513	0.275481	4.66506	3.0853e-06	3.25609e-05
ENSG00000169442	839.961	0.0228464	0.896883	0.0254732	0.979678	0.992686
ENSG00000117682	1505.66	0.0566444	0.186109	0.304361	0.760853	0.880999
ENSG00000223583	7.64272	0.619385	1.07642	0.57541	0.565014	0.750065
ENSG00000225891	6.21446	-0.211067	1.11093	-0.189991	0.849316	0.929251
ENSG00000198830	9406.41	-0.300877	0.157537	-1.90988	0.0561489	0.153796
ENSG00000117676	13795.1	-0.551222	0.21019	-2.62249	0.00872905	0.0341794
ENSG00000260063	6.70782	-0.618439	1.09782	-0.563332	0.573209	0.755921
ENSG00000117713	6608.37	-0.398559	0.149609	-2.664	0.00772179	0.0308389
ENSG00000060642	402.365	-0.297033	0.231844	-1.28118	0.200131	0.390966
ENSG00000204160	1608.09	-1.12522	0.289434	-3.88764	0.000101225	0.000740464
ENSG00000142751	1104.82	0.0143323	0.247382	0.0579359	0.9538	0.981252
ENSG00000198746	841.457	-0.772317	0.25553	-3.02241	0.0025077	0.0119325
ENSG00000090273	2825.08	0.371698	0.214507	1.7328	0.0831311	0.206851
ENSG00000253368	24.9508	1.96458	0.840203	2.33822	0.0193758	0.065925
ENSG00000158246	15.2158	2.19649	0.989416	2.21998	0.0264199	0.0850287
ENSG00000090020	1619.08	-1.04001	0.156746	-6.63499	3.24522e-11	8.66369e-10
ENSG00000225159	12.042	1.22058	0.641813	1.90177	0.0572006	0.156072
ENSG00000142784	3388.09	-0.121386	0.22544	-0.538441	0.590273	0.770372
ENSG00000186501	1369.01	-0.24836	0.237114	-1.04743	0.294902	0.506478
ENSG00000241547	13.3825	0.326268	0.791194	0.412374	0.680065	0.832494
ENSG00000142765	85.5958	1.49636	0.888623	1.68391	0.0921993	0.223711
ENSG00000142733	483.516	1.06525	0.307706	3.4619	0.000536384	0.00321004
ENSG00000181773	38.0147	2.88415	0.640054	4.50611	6.60274e-06	6.41146e-05
ENSG00000158195	12702.8	-0.0484418	0.224855	-0.215436	0.829427	0.919271
ENSG00000126705	822.103	0.322334	0.19711	1.6353	0.101986	0.24131
ENSG00000000938	3914.86	-0.0535169	0.351073	-0.152438	0.878841	0.944292
ENSG00000235912	22.8783	0.840195	0.59353	1.41559	0.156896	0.331161
ENSG00000126709	26825.8	-3.77107	0.378036	-9.9754	1.95309e-23	2.16138e-21
ENSG00000225886	47.9465	-4.55934	0.928534	-4.91026	9.09553e-07	1.0723e-05
ENSG00000009780	290.465	0.0742992	0.179401	0.414151	0.678763	0.831671
ENSG00000117758	5150.9	-0.625572	0.221037	-2.83017	0.00465238	0.0201584
ENSG00000270031	9.80912	-1.02467	0.865496	-1.18391	0.236448	0.436067
ENSG00000117751	1743.55	-0.277336	0.144996	-1.91271	0.0557848	0.152989
ENSG00000130775	5016.53	-1.46817	0.165954	-8.84688	9.00001e-19	6.27751e-17
ENSG00000117748	2114.29	-0.616992	0.245112	-2.51718	0.0118298	0.0441312
ENSG00000158156	577.96	-0.466974	0.245958	-1.89859	0.0576184	0.15691
ENSG00000158161	2662.49	-1.20761	0.169839	-7.11028	1.15808e-12	3.82977e-11
ENSG00000238231	6.32031	-2.37516	1.46458	-1.62174	0.10486	0.246402
ENSG00000240750	6.43038	-0.205434	1.00333	-0.204752	0.837766	0.923201
ENSG00000228589	47.3316	-0.545295	0.355783	-1.53266	0.125359	0.280783
ENSG00000169403	22720.2	-1.99824	0.175512	-11.3852	4.9531e-30	9.43422e-28
ENSG00000126698	3255.8	0.113105	0.191889	0.589426	0.555575	0.743407
ENSG00000130770	1568.3	0.122099	0.148509	0.822171	0.41098	0.626659
ENSG00000270605	15.8785	0.795752	0.678688	1.17249	0.241002	0.441547
ENSG00000130766	3764.04	-1.92919	0.23615	-8.16931	3.10148e-16	1.66616e-14
ENSG00000130772	893.469	-0.0403578	0.29891	-0.135017	0.892599	0.951283
ENSG00000204138	1518.13	-0.481015	0.119017	-4.04156	5.3097e-05	0.000418472
ENSG00000180198	1017.75	1.37477	0.260445	5.27854	1.30215e-07	1.81395e-06
ENSG00000242125	681.238	0.972027	0.236142	4.11628	3.85037e-05	0.000314913
ENSG00000200087	46.873	-0.508851	0.498067	-1.02165	0.306945	0.520354
ENSG00000231468	4.37605	2.33357	1.42666	1.63569	0.101904	0.241173
ENSG00000279443	14.4828	1.59199	0.766462	2.07706	0.0377958	0.11296
ENSG00000180098	592.279	-0.753667	0.196344	-3.83849	0.000123792	0.000888795
ENSG00000197989	464.972	0.50917	0.213424	2.38571	0.017046	0.0594376
ENSG00000221539	9.96581	1.00678	0.655021	1.53702	0.124289	0.279033
ENSG00000120656	1028	-0.321937	0.135927	-2.36845	0.0178627	0.0617121
ENSG00000188060	918.641	0.811446	0.330356	2.45628	0.0140384	0.05082
ENSG00000229388	5.14292	2.7214	1.20346	2.26132	0.0237396	0.0779734
ENSG00000162419	971.533	-0.445707	0.179871	-2.47792	0.0132149	0.0483514
ENSG00000198492	2911.62	-0.0548589	0.135739	-0.40415	0.686102	0.836421
ENSG00000116329	9.67056	2.71296	1.23608	2.1948	0.0281779	0.0896236
ENSG00000159023	1565.35	0.985447	0.241124	4.08688	4.3721e-05	0.000353642
ENSG00000116350	3583.85	-0.200739	0.112415	-1.7857	0.0741484	0.189817
ENSG00000116353	278.884	1.0758	0.265941	4.04527	5.22633e-05	0.00041361
ENSG00000060656	107.401	-0.60327	0.559695	-1.07785	0.281099	0.490555
ENSG00000186056	7.58593	-0.175919	1.06364	-0.165393	0.868635	0.939184
ENSG00000162511	101359	0.413461	0.232721	1.77664	0.075628	0.192783
ENSG00000264773	9.49924	-0.71387	0.853977	-0.835935	0.403191	0.619565
ENSG00000162512	3028.9	0.924127	0.190893	4.84107	1.2914e-06	1.47018e-05
ENSG00000134644	4661.49	-0.0111774	0.168627	-0.0662849	0.947151	0.978125
ENSG00000084628	6.99436	-4.44342	2.52768	-1.75791	0.0787636	0.199009
ENSG00000060688	1227.65	0.201842	0.210323	0.959678	0.337217	0.554626
ENSG00000229447	4.89447	-0.835249	1.10487	-0.755969	0.449668	0.660498
ENSG00000121766	716.211	-0.302615	0.191469	-1.58049	0.113995	0.261659
ENSG00000121769	708.893	1.23042	0.49672	2.47709	0.0132458	0.0484287
ENSG00000168528	519.416	0.802699	0.58433	1.37371	0.169532	0.350367
ENSG00000142910	14.5669	1.74629	1.3683	1.27625	0.201867	0.393078
ENSG00000121764	8.39961	-1.36595	0.741572	-1.84196	0.065481	0.172557
ENSG00000162517	1236.69	-0.876291	0.194378	-4.50818	6.53858e-06	6.35538e-05
ENSG00000084636	38.2264	-1.9538	2.04706	-0.95444	0.339861	0.556757
ENSG00000121753	5.05853	0.573819	2.41152	0.237949	0.811921	0.910257
ENSG00000134668	297.805	1.10747	1.06039	1.0444	0.296301	0.508
ENSG00000269967	12.5033	-2.45784	0.822825	-2.98708	0.0028166	0.0131776
ENSG00000184007	9494.92	-0.691285	0.164124	-4.21196	2.53163e-05	0.000215973
ENSG00000228634	15.1562	-1.569	0.939905	-1.66932	0.0950542	0.228582
ENSG00000121774	4120.59	0.123838	0.14747	0.839754	0.401046	0.617611
ENSG00000203325	5.61466	-0.325587	1.06201	-0.306577	0.759165	0.879588
ENSG00000121775	639.19	0.438175	0.354608	1.23566	0.216586	0.412256
ENSG00000025800	3609.71	-0.0249336	0.187138	-0.133237	0.894006	0.952373
ENSG00000084652	4596.19	-0.276904	0.135332	-2.04611	0.0407457	0.119557
ENSG00000160050	76.7126	-0.807972	0.377568	-2.13994	0.03236	0.0999562
ENSG00000160051	46.1532	0.167246	0.344792	0.485062	0.627632	0.796862
ENSG00000222046	15.6967	-0.493994	0.724476	-0.681864	0.495325	0.697561
ENSG00000160055	277.968	-0.824943	0.227785	-3.62158	0.000292807	0.00187953
ENSG00000084623	4047.8	0.481779	0.245166	1.96512	0.0494006	0.138884
ENSG00000220785	192.628	0.639266	0.17367	3.68091	0.000232401	0.00154122
ENSG00000116478	3948.17	-0.103251	0.223644	-0.461678	0.644312	0.807899
ENSG00000175130	4855.59	0.0983161	0.613446	0.160269	0.87267	0.941388
ENSG00000162526	10.5975	-0.152897	1.11099	-0.137623	0.890539	0.950161
ENSG00000225828	36.4387	-0.986244	0.520084	-1.89631	0.0579185	0.157511
ENSG00000160058	2345.18	-0.812213	0.14314	-5.67425	1.39301e-08	2.36453e-07
ENSG00000160062	38.948	0.46883	0.601393	0.779574	0.435642	0.648552
ENSG00000176261	502.1	-0.295536	0.248877	-1.18748	0.235039	0.43444
ENSG00000162521	3915.44	0.374902	0.14059	2.66663	0.00766152	0.0306291
ENSG00000162520	5.66621	3.44384	1.96268	1.75467	0.0793163	0.200124
ENSG00000162522	666.761	0.119607	0.300321	0.398266	0.690434	0.839601
ENSG00000134684	3515.28	0.499801	0.2437	2.05089	0.0402776	0.118641
ENSG00000116497	650.178	0.208955	0.153402	1.36213	0.173156	0.355408
ENSG00000160097	6.17178	0.3091	1.42744	0.216541	0.828566	0.918831
ENSG00000121900	25.3112	-2.71697	0.931484	-2.91681	0.00353626	0.0159676
ENSG00000116514	9686.34	-2.1718	0.297189	-7.30781	2.71539e-13	9.7621e-12
ENSG00000278966	11.7019	-0.652464	1.46658	-0.444888	0.656401	0.815878
ENSG00000217644	12.4771	-1.4896	1.35777	-1.09709	0.272602	0.480981
ENSG00000239670	12.4578	-1.14573	0.828758	-1.38247	0.166829	0.346002
ENSG00000004455	3705.81	0.517629	0.236919	2.18484	0.0289007	0.0913507
ENSG00000142920	88.4001	-1.8553	0.564104	-3.28893	0.0010057	0.00550479
ENSG00000278997	14.2017	-0.936376	0.92227	-1.01529	0.309965	0.523744
ENSG00000116525	410.256	-0.731788	0.240322	-3.04503	0.00232659	0.0111999
ENSG00000279179	15.8028	-0.263586	0.66713	-0.395104	0.692766	0.841489
ENSG00000160094	1405.94	-0.00697969	0.256794	-0.0271801	0.978316	0.992085
ENSG00000270115	5.6559	0.53133	1.44996	0.366444	0.714034	0.855054
ENSG00000225313	279.243	-0.893683	0.293278	-3.04722	0.00230965	0.0111319
ENSG00000134686	7092.88	-0.239979	0.291135	-0.824288	0.409776	0.625415
ENSG00000284154	5.34471	-1.48087	0.765295	-1.93503	0.0529863	0.14688
ENSG00000222112	40.3496	-0.504365	0.597088	-0.844707	0.398274	0.615015
ENSG00000233246	6.56875	2.06744	0.991163	2.08587	0.0369906	0.11107
ENSG00000234512	15.6432	4.29891	1.39197	3.08836	0.00201263	0.00990762
ENSG00000121903	352.604	-0.330163	0.257831	-1.28054	0.200356	0.391145
ENSG00000121904	11.5151	-0.972119	1.67267	-0.581178	0.56112	0.747842
ENSG00000163866	1844.73	-0.160525	0.214585	-0.74807	0.454418	0.664567
ENSG00000230163	43.9535	0.39803	0.361899	1.09984	0.271403	0.479719
ENSG00000116544	100.916	6.21557	0.678943	9.15478	5.44695e-20	4.29875e-18
ENSG00000241014	65.9577	-0.56888	0.420389	-1.35322	0.175984	0.359203
ENSG00000163867	382.294	0.691733	0.425466	1.62583	0.103987	0.244784
ENSG00000197056	316.934	0.142484	0.319688	0.445697	0.655816	0.815482
ENSG00000116560	7077.57	0.501692	0.147814	3.39409	0.000688572	0.00398362
ENSG00000146463	2019.01	-0.00631863	0.215211	-0.0293602	0.976577	0.991595
ENSG00000229994	11.3964	0.570552	0.803575	0.710017	0.477693	0.683776
ENSG00000142687	2851.12	-0.162272	0.208254	-0.779205	0.435859	0.648826
ENSG00000020129	841.009	0.229591	0.297898	0.770703	0.440883	0.65375
ENSG00000239636	12.5267	-0.673074	0.989538	-0.680189	0.496384	0.697862
ENSG00000116819	27.1024	-0.853142	0.843134	-1.01187	0.311601	0.525721
ENSG00000126067	3439.1	-0.000864023	0.171726	-0.0050314	0.995986	0.998455
ENSG00000142686	602.762	0.0103719	0.240364	0.0431509	0.965581	0.986752
ENSG00000092853	305.706	1.46408	0.500999	2.92232	0.00347439	0.0157313
ENSG00000134698	2065.64	-0.189479	0.193486	-0.979295	0.327434	0.543365
ENSG00000092847	3400.39	0.326389	0.141105	2.3131	0.0207174	0.0696405
ENSG00000126070	1144.1	-0.536175	0.275154	-1.94864	0.051339	0.143115
ENSG00000271554	5.69025	-1.72492	1.17797	-1.46431	0.143108	0.309176
ENSG00000116863	860.726	0.00015135	0.214992	0.000703982	0.999438	0.999842
ENSG00000171812	472.3	1.92578	0.485531	3.96634	7.29841e-05	0.000555201
ENSG00000054116	2287.14	-0.154427	0.250929	-0.615421	0.538277	0.730724
ENSG00000116871	10414.8	-0.541952	0.213591	-2.53734	0.0111699	0.0420896
ENSG00000054118	6022.5	0.13013	0.105653	1.23167	0.218071	0.41385
ENSG00000214193	470.367	0.0201931	0.526719	0.0383374	0.969419	0.988481
ENSG00000142694	460.918	0.881931	0.536444	1.64403	0.10017	0.238064
ENSG00000116883	75.2511	-0.0335638	0.653613	-0.0513512	0.959046	0.983472
ENSG00000196182	6501.39	0.0216907	0.35468	0.0611556	0.951235	0.980284
ENSG00000181817	1299.61	0.572289	0.292441	1.95694	0.0503546	0.141066
ENSG00000116885	46.7823	-0.697522	0.314605	-2.21714	0.0266137	0.0855275
ENSG00000116898	961.615	0.689652	0.184792	3.73203	0.00018994	0.00129163
ENSG00000119535	592.855	0.15183	0.45147	0.336302	0.736643	0.867239
ENSG00000233621	217.618	-1.06962	0.291575	-3.66841	0.000244061	0.00160618
ENSG00000163874	4116.6	-4.35377	0.208114	-20.9201	3.51375e-97	1.16006e-93
ENSG00000163875	991.95	-0.104551	0.213596	-0.489481	0.624502	0.795035
ENSG00000263675	7.87867	0.848658	0.888364	0.955304	0.339424	0.556409
ENSG00000163877	860.4	-0.55369	0.178477	-3.1023	0.00192025	0.00953101
ENSG00000232273	10.1211	-1.93783	0.940448	-2.06054	0.0393474	0.116646
ENSG00000163879	51.741	0.317005	0.459976	0.689178	0.490711	0.693974
ENSG00000134697	1225.6	0.110982	0.228908	0.484831	0.627796	0.796925
ENSG00000116922	373.744	0.0443221	0.197542	0.224368	0.822471	0.915605
ENSG00000134690	246.674	0.389299	0.294806	1.32053	0.186659	0.373489
ENSG00000183317	28.9791	-1.16148	1.46028	-0.79538	0.426392	0.64124
ENSG00000185090	121.653	-3.01609	0.374976	-8.0434	8.73774e-16	4.4381e-14
ENSG00000196449	623.367	-1.2789	0.209552	-6.103	1.04096e-09	2.166e-08
ENSG00000197982	4857.56	-3.30712	0.201512	-16.4115	1.5817e-60	1.64904e-57
ENSG00000188786	5866.41	-1.987	0.142979	-13.8972	6.58798e-44	3.43424e-41
ENSG00000235673	4.32768	-2.06066	1.61251	-1.27792	0.201278	0.392355
ENSG00000204084	1655.62	-0.865054	0.153137	-5.6489	1.61479e-08	2.69935e-07
ENSG00000252448	13.8504	-1.02984	0.720728	-1.42889	0.153035	0.324987
ENSG00000222282	4.40892	-1.40524	1.5313	-0.91768	0.358786	0.576602
ENSG00000183431	3003.75	0.628403	0.171409	3.66609	0.000246283	0.00161865
ENSG00000212541	14.9233	-0.0535339	0.564191	-0.094886	0.924405	0.968722
ENSG00000183386	1396.22	-0.322407	0.311139	-1.03622	0.300101	0.51243
ENSG00000183520	867.089	0.331745	0.125395	2.64559	0.00815482	0.0322047
ENSG00000185668	5.68756	-1.06936	1.85901	-0.575231	0.565135	0.750065
ENSG00000215895	31.961	-0.842132	0.436882	-1.9276	0.0539051	0.148903
ENSG00000116954	908.038	-0.282091	0.144892	-1.9469	0.0515463	0.143572
ENSG00000228436	24.8756	-0.389585	0.449138	-0.867406	0.38572	0.603111
ENSG00000214114	409.515	1.19755	0.213887	5.59897	2.15632e-08	3.51145e-07
ENSG00000158315	9.13066	-0.879767	0.785411	-1.12014	0.262656	0.46852
ENSG00000174574	4593.83	-0.334996	0.203789	-1.64384	0.10021	0.238102
ENSG00000168653	2477.56	0.477618	0.209628	2.27841	0.0227023	0.075039
ENSG00000127603	15996	0.0480491	0.285783	0.168131	0.86648	0.938598
ENSG00000183682	8.89766	-0.0834081	0.93455	-0.0892495	0.928884	0.970467
ENSG00000182109	42.3086	-0.718315	0.430659	-1.66794	0.0953271	0.229111
ENSG00000243970	17.5381	-0.813958	0.90233	-0.902063	0.367024	0.584611
ENSG00000090621	4624.36	1.21316	0.171044	7.09269	1.31526e-12	4.28518e-11
ENSG00000228060	5.55836	1.31315	1.31961	0.995106	0.319685	0.534826
ENSG00000201457	4.83815	1.04958	0.977289	1.07397	0.282837	0.491854
ENSG00000163909	39.6456	2.9383	0.857396	3.427	0.000610285	0.00358728
ENSG00000084072	931.658	0.45611	0.243563	1.87265	0.0611162	0.163734
ENSG00000116985	54.6468	1.57387	0.587541	2.67874	0.0073899	0.0297292
ENSG00000043514	349.863	0.687067	0.218554	3.14369	0.00166832	0.00845295
ENSG00000116990	773.538	0.501884	0.526617	0.953034	0.340573	0.5576
ENSG00000168389	483.431	-0.765894	0.249564	-3.06893	0.0021483	0.0104859
ENSG00000228477	16.9316	-0.465996	0.675728	-0.689621	0.490433	0.693802
ENSG00000131236	37528.4	-0.0064759	0.20439	-0.031684	0.974724	0.99083
ENSG00000131238	12432.9	0.91954	0.250547	3.67013	0.000242424	0.00159806
ENSG00000117000	784.398	-0.449781	0.416981	-1.07866	0.28074	0.490187
ENSG00000259943	60.4816	-0.624887	0.471064	-1.32654	0.18466	0.370888
ENSG00000084073	2836.13	-0.0040421	0.198908	-0.0203215	0.983787	0.994734
ENSG00000049089	317.37	-0.892082	0.315306	-2.82926	0.00466554	0.020201
ENSG00000084070	6474.17	-1.19494	0.225536	-5.29824	1.16922e-07	1.6438e-06
ENSG00000187801	42.1717	-0.0419627	0.549847	-0.076317	0.939167	0.974642
ENSG00000260920	33.9485	-0.383058	0.63042	-0.607624	0.543437	0.734915
ENSG00000187815	93.5399	0.645715	0.354141	1.82333	0.0682536	0.178372
ENSG00000238287	4.23293	-0.082993	1.09416	-0.0758509	0.939538	0.974728
ENSG00000164002	104.799	-0.501155	0.265454	-1.88792	0.059037	0.159632
ENSG00000238186	3.80543	0.893369	1.27233	0.702154	0.482583	0.68803
ENSG00000117010	78.238	-0.0519012	0.550354	-0.0943051	0.924867	0.96899
ENSG00000117016	1047.99	0.237678	0.263656	0.90147	0.367338	0.584795
ENSG00000272145	25.063	-0.23217	0.523701	-0.443326	0.65753	0.816871
ENSG00000066136	1926.28	-0.394125	0.178569	-2.20714	0.0273044	0.0873504
ENSG00000117013	6.00489	-2.80773	1.72701	-1.62577	0.103998	0.244784
ENSG00000179862	16.4637	1.45573	1.13535	1.28218	0.199779	0.390625
ENSG00000171793	995.34	0.995441	0.183438	5.42659	5.74415e-08	8.50418e-07
ENSG00000281207	14.5461	0.867795	0.73042	1.18808	0.234803	0.434257
ENSG00000171790	8.30606	1.74186	0.987439	1.76402	0.0777288	0.196922
ENSG00000010803	219.501	0.153556	0.320145	0.479645	0.63148	0.799501
ENSG00000127124	2295.85	1.25377	0.272139	4.60709	4.0835e-06	4.17605e-05
ENSG00000230638	9.11957	2.04731	0.983071	2.08256	0.0372911	0.111687
ENSG00000198815	1477.86	-0.0512387	0.0927263	-0.55258	0.580551	0.761747
ENSG00000177181	23.6014	-0.990053	0.85239	-1.1615	0.245437	0.446945
ENSG00000066185	15.7348	-1.03268	0.758217	-1.36199	0.173201	0.355428
ENSG00000127125	1381.24	0.103195	0.170528	0.605148	0.545081	0.736129
ENSG00000186409	37.7028	-0.350077	0.594008	-0.589347	0.555629	0.743428
ENSG00000236876	7.02767	0.183579	0.692063	0.265263	0.790807	0.898529
ENSG00000171960	519.731	0.899532	0.210127	4.28089	1.86147e-05	0.000163957
ENSG00000065978	27926.5	0.852893	0.223099	3.82293	0.000131878	0.000938686
ENSG00000117385	1445.66	0.0467426	0.131758	0.35476	0.722769	0.860561
ENSG00000164008	15.406	0.332835	0.625482	0.532125	0.594639	0.773422
ENSG00000228452	33.2489	0.998824	0.488232	2.0458	0.0407763	0.119594
ENSG00000274386	6.51645	-0.82084	0.94732	-0.866487	0.386223	0.603795
ENSG00000177868	222.538	0.16344	0.343585	0.475692	0.634294	0.801142
ENSG00000164010	475.423	0.0714504	0.189086	0.377872	0.705526	0.850159
ENSG00000228192	17.9111	-0.551257	0.586952	-0.939185	0.347636	0.56524
ENSG00000164011	303.995	-0.00994611	0.208002	-0.0478173	0.961862	0.984906
ENSG00000225099	4.57008	-1.47114	1.11532	-1.31904	0.187157	0.373994
ENSG00000117394	488.351	-1.54998	0.896338	-1.72923	0.0837672	0.208042
ENSG00000117395	708.846	0.895512	0.178741	5.01011	5.4399e-07	6.74336e-06
ENSG00000066056	495.797	0.570971	1.22213	0.467192	0.640363	0.805138
ENSG00000117400	4.09803	0.60606	1.47916	0.409732	0.682003	0.834006
ENSG00000234694	7.8437	-0.295313	1.03819	-0.284451	0.776064	0.890263
ENSG00000117399	306.286	2.82976	0.472207	5.99263	2.06471e-09	4.08181e-08
ENSG00000066322	3502.69	-0.272645	0.1425	-1.9133	0.0557094	0.152846
ENSG00000159479	1058.08	-0.194224	0.201836	-0.962283	0.335907	0.553162
ENSG00000229431	20.1365	0.189084	0.749413	0.252309	0.800802	0.903233
ENSG00000198198	2176.11	-0.315358	0.152697	-2.06525	0.0388989	0.115524
ENSG00000142949	2580.02	-2.40673	1.11821	-2.15229	0.0313742	0.0975653
ENSG00000066135	1895.36	-0.256322	0.210664	-1.21673	0.223705	0.420962
ENSG00000236200	17.7152	0.695279	0.631853	1.10038	0.271167	0.479516
ENSG00000126091	173.469	0.826642	0.304223	2.71722	0.0065832	0.0269102
ENSG00000237950	4.91785	1.52845	1.63368	0.93559	0.349484	0.566989
ENSG00000117408	1384.91	0.448443	0.167321	2.68014	0.00735912	0.0296114
ENSG00000132768	584.839	1.12058	0.264743	4.23272	2.30881e-05	0.00019885
ENSG00000117410	10029.5	-0.248717	0.22134	-1.12369	0.261146	0.466579
ENSG00000117411	140.386	1.13589	0.365514	3.10765	0.00188583	0.00939077
ENSG00000159214	51.8812	-0.110815	0.44459	-0.249252	0.803166	0.904047
ENSG00000196517	5.40391	2.26235	2.71533	0.833178	0.404744	0.620796
ENSG00000230615	3.9063	0.613731	1.8861	0.325396	0.744881	0.871808
ENSG00000233514	4.19454	0.574844	1.17756	0.488165	0.625433	0.795505
ENSG00000178028	1032.24	-0.3497	0.158181	-2.21076	0.0270528	0.0867621
ENSG00000117419	694.321	0.576538	0.213841	2.69611	0.00701548	0.0284366
ENSG00000233602	5.79396	-0.508051	1.34578	-0.377513	0.705793	0.850238
ENSG00000187147	1382.17	0.0824825	0.248096	0.332462	0.73954	0.868843
ENSG00000126106	374.644	0.20725	0.3016	0.68717	0.491975	0.694968
ENSG00000198520	28.1155	-0.441637	0.619613	-0.712762	0.475993	0.682367
ENSG00000142945	207.131	1.92913	0.41942	4.59951	4.23486e-06	4.31969e-05
ENSG00000142937	8857.12	1.0731	0.238376	4.50172	6.74048e-06	6.53559e-05
ENSG00000173846	1982.25	-2.04793	0.302198	-6.77678	1.22883e-11	3.47741e-10
ENSG00000188396	29.3489	-1.13074	0.717238	-1.57652	0.114905	0.263086
ENSG00000222009	754.458	-0.856408	0.287804	-2.97567	0.00292354	0.0136066
ENSG00000117425	63.1721	0.467286	0.478032	0.97752	0.328312	0.544501
ENSG00000070785	557.356	0.894176	0.314813	2.84034	0.00450658	0.0196329
ENSG00000126107	2457.53	-0.184303	0.19241	-0.95787	0.338128	0.555158
ENSG00000126088	1980.85	0.277783	0.279297	0.994582	0.31994	0.534826
ENSG00000186603	11.218	1.02759	1.38296	0.74304	0.457458	0.667731
ENSG00000132781	334.78	-0.375697	0.177948	-2.11128	0.0347485	0.105654
ENSG00000132773	276.927	-0.195297	0.180718	-1.08067	0.279843	0.489095
ENSG00000070759	305.893	0.113529	0.19445	0.583848	0.559322	0.746504
ENSG00000280670	48.4112	0.146519	0.486733	0.301026	0.763395	0.882829
ENSG00000132763	176.699	0.617045	0.219422	2.81213	0.00492146	0.0211381
ENSG00000117450	13206	-0.206224	0.191013	-1.07964	0.280304	0.489729
ENSG00000117448	6352.87	0.525995	0.215771	2.43774	0.0147792	0.0529311
ENSG00000132780	2667.04	0.115325	0.21622	0.533369	0.593778	0.772809
ENSG00000159588	66.9337	-0.471937	0.425358	-1.1095	0.267213	0.47443
ENSG00000159592	3858.9	-0.601395	0.116487	-5.16278	2.43305e-07	3.22815e-06
ENSG00000225447	10.6688	-0.576075	0.661198	-0.871258	0.383613	0.601329
ENSG00000234329	25.8448	-0.52607	0.599946	-0.876862	0.380561	0.598392
ENSG00000159596	676.041	0.220686	0.119365	1.84884	0.0644816	0.170536
ENSG00000197429	137.636	-0.925875	0.289311	-3.20027	0.00137297	0.00716659
ENSG00000230896	8.38365	-1.78595	0.980512	-1.82144	0.0685397	0.178786
ENSG00000086015	2263.86	0.235588	0.228496	1.03104	0.302524	0.515057
ENSG00000117461	284.873	1.2546	0.367089	3.4177	0.000631527	0.00369556
ENSG00000085998	1001.2	0.0782261	0.237186	0.32981	0.741544	0.8697
ENSG00000085999	67.8519	2.28721	0.495619	4.61484	3.9339e-06	4.05656e-05
ENSG00000132128	2770.76	-0.0586733	0.219509	-0.267293	0.789243	0.897842
ENSG00000173660	5314.87	1.20633	0.283789	4.2508	2.13008e-05	0.00018539
ENSG00000117481	864.562	0.25902	0.250473	1.03412	0.301078	0.513643
ENSG00000117480	92.2897	0.1989	0.503587	0.394966	0.692868	0.84152
ENSG00000232022	10.8524	0.171295	0.957477	0.178903	0.858014	0.934433
ENSG00000269956	194.254	0.285918	0.269998	1.05897	0.289615	0.500305
ENSG00000079277	9684.05	0.678631	0.208169	3.25999	0.00111414	0.00600872
ENSG00000142961	3643.92	-0.335222	0.261672	-1.28108	0.200167	0.390997
ENSG00000123472	906.27	0.821773	0.159199	5.16192	2.44428e-07	3.24088e-06
ENSG00000228237	6.36873	-0.548306	1.04113	-0.526646	0.598439	0.775715
ENSG00000159658	6940.75	0.214609	0.168235	1.27565	0.202079	0.393258
ENSG00000186377	72.3132	-0.00878316	1.61824	-0.00542759	0.995669	0.998448
ENSG00000224805	4.19103	2.87897	2.04616	1.40701	0.159424	0.334915
ENSG00000162366	6.26425	-6.73091	2.12595	-3.16607	0.00154516	0.00793561
ENSG00000162367	2489.51	3.71145	0.33137	11.2003	4.0623e-29	7.18483e-27
ENSG00000226252	230.635	3.8443	0.482198	7.97245	1.55562e-15	7.62753e-14
ENSG00000123473	267.466	0.864166	0.329702	2.62105	0.00876593	0.0343103
ENSG00000162368	2834.74	0.483335	0.314241	1.53811	0.124023	0.27864
ENSG00000225762	4.72617	0.709261	1.82504	0.388627	0.697552	0.845384
ENSG00000237424	135.941	-0.109663	0.401091	-0.273412	0.784537	0.89547
ENSG00000186564	74.4761	-0.0426086	0.474888	-0.0897235	0.928507	0.970467
ENSG00000132122	32.5158	-0.494337	0.54161	-0.912717	0.361391	0.579097
ENSG00000235105	5.01721	-1.16111	1.02457	-1.13327	0.2571	0.461814
ENSG00000162374	324.65	0.10876	0.289451	0.375747	0.707105	0.850967
ENSG00000237337	4.96616	0.454544	1.86838	0.243282	0.807787	0.907308
ENSG00000185104	757.115	0.739132	0.203937	3.62431	0.000289729	0.00186339
ENSG00000123080	320.246	2.29944	0.460674	4.99146	5.99253e-07	7.36847e-06
ENSG00000123091	2140.42	-0.422757	0.1581	-2.67399	0.00749541	0.0300976
ENSG00000233406	6.47749	2.03191	0.963526	2.10883	0.0349597	0.106114
ENSG00000085831	30.6759	-1.01446	0.747958	-1.35631	0.175001	0.35786
ENSG00000085832	6778.71	0.81984	0.245913	3.33386	0.000856497	0.00480905
ENSG00000232027	7.84407	0.86385	1.07177	0.806006	0.42024	0.635497
ENSG00000117859	2218.98	0.497807	0.202457	2.45883	0.0139389	0.0505266
ENSG00000078618	5604.63	-0.249059	0.139524	-1.78506	0.0742513	0.189958
ENSG00000266993	20.0222	0.100696	0.957472	0.105168	0.916242	0.964534
ENSG00000169213	24.0072	2.44728	2.4637	0.993334	0.320547	0.535299
ENSG00000117862	3774.02	0.0743559	0.164601	0.451734	0.651461	0.812235
ENSG00000198841	245.725	0.146426	0.235408	0.62201	0.533935	0.727373
ENSG00000228369	6.21904	-0.847127	0.953825	-0.888136	0.374467	0.591958
ENSG00000134717	2311.36	0.288742	0.152647	1.89157	0.0585489	0.158811
ENSG00000157077	67.4779	1.66683	0.628801	2.65081	0.00803002	0.031807
ENSG00000154222	2220.57	-0.790681	0.103085	-7.67019	1.71739e-14	7.21765e-13
ENSG00000272100	6.38434	0.243957	0.953374	0.255888	0.798038	0.901993
ENSG00000224680	5.50511	-1.18913	1.21074	-0.982157	0.326023	0.541794
ENSG00000085840	258.278	1.19713	0.232204	5.15553	2.52916e-07	3.34447e-06
ENSG00000134748	1223.08	-0.0384787	0.15268	-0.252023	0.801024	0.903233
ENSG00000134744	918.713	0.841652	0.223159	3.77154	0.000162246	0.00112493
ENSG00000116157	27.3606	1.67319	0.63073	2.65279	0.00798294	0.0316715
ENSG00000182183	11.1525	1.83844	1.2094	1.52012	0.12848	0.286058
ENSG00000162377	802.353	1.00288	0.128749	7.7894	6.73298e-15	3.00349e-13
ENSG00000162378	1696.17	0.0487109	0.230166	0.211634	0.832392	0.920394
ENSG00000228929	29.8573	1.77191	0.573297	3.09073	0.00199666	0.00983877
ENSG00000121310	672	-0.117307	0.302512	-0.387775	0.698182	0.845786
ENSG00000230953	24.4216	-0.828661	0.593464	-1.39631	0.162621	0.33977
ENSG00000116171	2937.64	0.621298	0.331972	1.87154	0.0612702	0.164036
ENSG00000174348	7.12095	0.344286	2.33149	0.147668	0.882605	0.945976
ENSG00000162383	7.87033	1.25331	2.11352	0.592994	0.553185	0.742112
ENSG00000157184	978.466	-0.511873	0.167861	-3.04939	0.00229307	0.0110573
ENSG00000162384	568.067	0.30653	0.168129	1.82318	0.0682757	0.1784
ENSG00000162385	791.108	-0.552254	0.150017	-3.68127	0.000232079	0.0015396
ENSG00000226754	7.91414	-0.601891	1.15244	-0.522277	0.601478	0.778279
ENSG00000157193	626.146	0.0189194	0.30652	0.0617233	0.950783	0.980057
ENSG00000058804	799.254	1.61601	0.182552	8.8523	8.57306e-19	6.00084e-17
ENSG00000058799	1605.29	-0.519397	0.219006	-2.37162	0.0177105	0.0613227
ENSG00000211452	44.4954	0.399712	0.528275	0.756636	0.449268	0.660011
ENSG00000081870	547.613	-0.0891532	0.200365	-0.444954	0.656353	0.815869
ENSG00000116212	457.281	-0.238744	0.239994	-0.994793	0.319837	0.534826
ENSG00000219102	7.15605	0.00105468	0.865695	0.0012183	0.999028	0.999653
ENSG00000116209	5550.44	-0.0596828	0.176559	-0.338033	0.735339	0.866682
ENSG00000280378	11.4492	1.43476	0.845679	1.69658	0.0897768	0.219283
ENSG00000116205	612.335	0.386284	0.220554	1.75143	0.0798727	0.20094
ENSG00000215883	156.686	1.83595	0.301013	6.09924	1.06576e-09	2.21528e-08
ENSG00000116221	1317.28	0.551473	0.213312	2.58529	0.00972979	0.0374175
ENSG00000157216	2203.65	0.180152	0.18456	0.976118	0.329006	0.545151
ENSG00000198711	40.7813	-0.0924096	0.469016	-0.197028	0.843805	0.926369
ENSG00000162390	1407.22	1.08756	0.259729	4.18729	2.82308e-05	0.000238915
ENSG00000162391	74.0548	1.09523	0.326904	3.35032	0.000807193	0.00456457
ENSG00000184313	62.9135	0.259232	0.504004	0.514344	0.607011	0.781966
ENSG00000243725	13.8877	0.311518	0.605015	0.514893	0.606628	0.781777
ENSG00000162396	245.929	0.126873	0.300013	0.422891	0.672375	0.827624
ENSG00000116133	3476.57	0.598538	0.331076	1.80786	0.0706284	0.183245
ENSG00000169174	4.77017	-0.869854	2.1015	-0.413921	0.678932	0.831826
ENSG00000162402	2577.57	0.271835	0.269452	1.00885	0.313049	0.527401
ENSG00000162407	73.572	-2.23933	0.947838	-2.36257	0.0181487	0.0625106
ENSG00000173406	36.0564	2.36172	0.720928	3.27594	0.0010531	0.00571689
ENSG00000162600	210.713	-0.271323	0.321232	-0.844633	0.398316	0.615031
ENSG00000184292	84.2153	1.18093	0.939578	1.25687	0.208801	0.40145
ENSG00000185839	6.19315	0.624664	1.22805	0.508665	0.610987	0.785249
ENSG00000162601	1636.6	0.348269	0.506223	0.687975	0.491468	0.69445
ENSG00000177606	5679.51	-1.20582	0.333226	-3.61864	0.00029616	0.00189982
ENSG00000234807	10.6099	1.17826	1.36776	0.861452	0.388989	0.607162
ENSG00000232453	34.3238	-0.484024	0.590688	-0.819425	0.412544	0.628087
ENSG00000237352	17.4799	-1.25646	0.79116	-1.58813	0.112257	0.258751
ENSG00000172456	267.376	-0.902861	0.292637	-3.08526	0.00203373	0.0100015
ENSG00000162599	14.2859	4.93359	1.31836	3.74223	0.000182397	0.00124978
ENSG00000162604	669.509	-0.298626	0.175543	-1.70116	0.0889131	0.217603
ENSG00000132849	14.3383	-0.52649	1.59231	-0.330646	0.740912	0.869504
ENSG00000132854	46.0963	0.335634	1.80237	0.186218	0.852274	0.930772
ENSG00000162607	763.241	0.344717	0.502696	0.685737	0.492879	0.695834
ENSG00000116641	1505.69	0.159886	0.342326	0.467059	0.640458	0.805155
ENSG00000235545	8.07584	-0.675667	1.6538	-0.408555	0.682866	0.834633
ENSG00000125703	899.801	1.38719	0.349319	3.97115	7.15279e-05	0.000545589
ENSG00000088035	319.244	-0.0718483	0.312564	-0.229867	0.818195	0.913598
ENSG00000142856	108.389	0.697807	0.451644	1.54504	0.122337	0.27576
ENSG00000203965	36.8412	0.283101	0.846272	0.334527	0.737982	0.867857
ENSG00000079739	262.553	-0.583797	0.567668	-1.02841	0.303756	0.516422
ENSG00000185483	6.91698	3.97637	2.59824	1.53041	0.125915	0.281636
ENSG00000158966	18.8303	-1.99462	0.747043	-2.67001	0.00758482	0.0303838
ENSG00000162437	9.87977	-1.4621	1.41922	-1.03022	0.302909	0.515358
ENSG00000162434	7927.95	-1.23899	0.191954	-6.4546	1.08502e-10	2.63075e-09
ENSG00000162433	783.79	-5.20281	1.11951	-4.64739	3.36157e-06	3.52885e-05
ENSG00000116675	36.2881	-2.81838	0.892887	-3.15648	0.00159686	0.00814035
ENSG00000213625	3828.67	-0.649404	0.144165	-4.5046	6.64979e-06	6.45398e-05
ENSG00000116678	148.752	-0.368074	0.468193	-0.78616	0.431774	0.645851
ENSG00000184588	2336.35	-3.40457	0.25323	-13.4446	3.31169e-41	1.49094e-38
ENSG00000118473	13.3692	-0.823201	1.32096	-0.623186	0.533162	0.72677
ENSG00000152760	287.903	-1.24261	0.630713	-1.97017	0.0488191	0.137699
ENSG00000152763	11.9757	-0.964835	0.886618	-1.08822	0.276498	0.485047
ENSG00000198160	1314.82	-0.371463	0.353645	-1.05039	0.293541	0.504935
ENSG00000116704	723.022	-0.664933	0.159552	-4.1675	3.07952e-05	0.000258265
ENSG00000162594	8.29537	-0.629683	1.31066	-0.480433	0.630919	0.799251
ENSG00000081985	8.10601	-2.72402	1.13011	-2.41039	0.0159354	0.0563083
ENSG00000142864	7740.19	0.820521	0.17439	4.70509	2.53749e-06	2.7244e-05
ENSG00000116717	811.28	-2.08549	0.378106	-5.51562	3.47554e-08	5.3913e-07
ENSG00000172380	1005.25	1.30002	0.26383	4.9275	8.32892e-07	9.91936e-06
ENSG00000116729	331.346	2.49774	0.656719	3.80336	0.000142745	0.00100627
ENSG00000024526	71.308	4.53258	0.989945	4.57861	4.68071e-06	4.7258e-05
ENSG00000033122	39.3518	2.1255	0.666406	3.1895	0.0014252	0.00741185
ENSG00000066557	429.725	0.0490845	0.602879	0.0814169	0.93511	0.972929
ENSG00000116754	3457.55	0.0357389	0.329567	0.108442	0.913645	0.963603
ENSG00000118454	923.011	-0.259122	0.231638	-1.11865	0.26329	0.469365
ENSG00000197568	140.458	-0.777519	0.368999	-2.1071	0.0351088	0.106504
ENSG00000116761	35.4971	-0.450802	0.501649	-0.89864	0.368844	0.586344
ENSG00000050628	373.163	2.08127	0.480509	4.3314	1.48167e-05	0.000133351
ENSG00000235079	6.10901	-1.13989	1.50596	-0.75692	0.449098	0.659954
ENSG00000132485	1465.66	0.348126	0.443769	0.784476	0.432761	0.646595
ENSG00000207721	8.14827	-0.949003	1.09986	-0.862841	0.388225	0.606159
ENSG00000229956	6.91057	-0.366893	0.831817	-0.441074	0.659159	0.818074
ENSG00000172260	4.28369	3.79387	2.70529	1.40239	0.160798	0.33685
ENSG00000233994	7.84663	-0.635428	1.03362	-0.614758	0.538715	0.731226
ENSG00000162620	13.9365	0.277089	1.15263	0.240397	0.810022	0.908746
ENSG00000254685	359.55	0.0182906	0.380955	0.0480125	0.961706	0.984906
ENSG00000259030	7.01745	-0.349036	1.26979	-0.274877	0.78341	0.895113
ENSG00000178965	5.43484	0.663329	2.18358	0.303781	0.761295	0.881378
ENSG00000116791	608.308	-0.213928	0.390032	-0.548487	0.583357	0.764015
ENSG00000162623	410.112	0.612884	0.457927	1.33839	0.18077	0.365545
ENSG00000137968	6.79498	2.35017	1.7963	1.30834	0.190758	0.378537
ENSG00000117054	1685.98	1.16593	0.450541	2.58784	0.00965811	0.0371851
ENSG00000181227	29.8016	0.600713	0.51481	1.16686	0.243265	0.444419
ENSG00000137955	1215.36	0.904554	0.35866	2.52203	0.0116678	0.0436338
ENSG00000057468	7.82559	-0.108286	1.1914	-0.0908901	0.92758	0.970131
ENSG00000226415	89.5752	-0.905757	0.316327	-2.86335	0.00419181	0.0184623
ENSG00000117069	8.5276	2.00212	3.55719	0.562837	0.573546	0.756315
ENSG00000142892	498.088	0.382409	0.343354	1.11375	0.265389	0.47208
ENSG00000226084	34.1795	1.03372	0.463992	2.22788	0.0258884	0.0835626
ENSG00000154027	53.9832	-0.663511	1.82545	-0.363478	0.716248	0.856307
ENSG00000036549	630.645	0.815931	0.40752	2.00219	0.0452645	0.12993
ENSG00000077254	2193.51	-0.217843	0.23305	-0.934749	0.349918	0.567401
ENSG00000180488	492.543	-0.0339001	0.367686	-0.0921985	0.92654	0.969674
ENSG00000219201	33.4172	-0.292549	0.446169	-0.655691	0.512023	0.709832
ENSG00000162614	23.2452	0.0633538	1.31869	0.0480428	0.961682	0.984906
ENSG00000162613	2588.02	-0.509806	0.173054	-2.94594	0.0032198	0.0147607
ENSG00000162616	408.34	-1.15019	0.576711	-1.9944	0.0461088	0.131742
ENSG00000122420	15.827	-0.0960502	1.79853	-0.0534049	0.957409	0.982303
ENSG00000137959	1343.37	-4.81148	1.00402	-4.79219	1.64967e-06	1.83689e-05
ENSG00000137965	786.525	-2.30619	0.55342	-4.16715	3.08429e-05	0.000258555
ENSG00000162618	7.20635	-2.22067	2.03583	-1.0908	0.275363	0.483655
ENSG00000117114	12.6316	0.0316454	1.96485	0.0161058	0.98715	0.996304
ENSG00000227288	6.08997	-1.12751	0.803107	-1.40394	0.160337	0.336132
ENSG00000137941	7.823	1.13445	2.42377	0.468054	0.639746	0.804654
ENSG00000142875	129.316	2.9746	0.671783	4.42792	9.51459e-06	8.94941e-05
ENSG00000137976	7.12298	3.22609	1.58315	2.03777	0.0415733	0.121441
ENSG00000117133	585.147	0.354535	0.163289	2.17121	0.0299151	0.0939422
ENSG00000174021	2783.93	-0.233878	0.151466	-1.5441	0.122564	0.276132
ENSG00000122432	27.6875	-0.695681	0.523504	-1.32889	0.183884	0.369727
ENSG00000117151	843.285	-0.498817	0.202517	-2.46308	0.0137748	0.050058
ENSG00000117155	65.0537	1.80071	0.738329	2.4389	0.0147322	0.0528296
ENSG00000171517	36.3616	-5.24187	1.0743	-4.87935	1.06434e-06	1.2373e-05
ENSG00000153898	1345.4	-4.47102	0.432185	-10.3452	4.40121e-25	5.69827e-23
ENSG00000162643	35.0766	-1.86897	1.13074	-1.65287	0.0983564	0.234882
ENSG00000055732	102.603	0.0224718	0.70554	0.0318504	0.974591	0.990797
ENSG00000097096	5.74536	-0.0882496	1.43583	-0.0614626	0.950991	0.980134
ENSG00000162642	555.933	-0.336348	0.163085	-2.06241	0.0391692	0.116189
ENSG00000142867	1218.45	-0.54203	0.158188	-3.4265	0.000611405	0.00359173
ENSG00000153904	27.6941	0.646463	1.14953	0.56237	0.573864	0.756483
ENSG00000142871	67.2764	2.41922	1.96542	1.23089	0.218363	0.41428
ENSG00000117174	473.69	0.467215	0.245333	1.90441	0.0568565	0.155455
ENSG00000171502	50.1004	-1.59751	0.655207	-2.43818	0.0147613	0.0529
ENSG00000122417	306.519	-0.899533	0.43808	-2.05335	0.0400385	0.118147
ENSG00000137975	9.82449	0.75789	1.31404	0.576763	0.5641	0.749541
ENSG00000261737	18.8831	-1.59675	0.782288	-2.04113	0.0412382	0.120698
ENSG00000097033	3943.65	-0.491202	0.271921	-1.80642	0.0708534	0.183733
ENSG00000183291	5637.59	0.0596903	0.136628	0.436883	0.662196	0.820301
ENSG00000153936	1701.28	-0.156866	0.370345	-0.423567	0.671882	0.82729
ENSG00000267272	8.39909	-1.73638	0.978411	-1.77469	0.0759484	0.193376
ENSG00000143013	1327.96	0.0828287	0.301176	0.275017	0.783303	0.895042
ENSG00000065243	846.956	-0.349517	0.436708	-0.800346	0.423511	0.638311
ENSG00000241975	6.86028	-0.822873	1.23853	-0.664394	0.506438	0.70524
ENSG00000137947	1023.18	-0.666318	0.183258	-3.63595	0.00027696	0.00179643
ENSG00000235308	6.33953	-0.650444	1.10889	-0.586571	0.557492	0.744814
ENSG00000137944	755.048	-0.362584	0.310763	-1.16675	0.243309	0.444444
ENSG00000213516	557.466	-0.621784	0.22476	-2.76643	0.00566731	0.0237646
ENSG00000117226	413.932	-1.80605	0.598623	-3.01701	0.00255279	0.0121209
ENSG00000117228	823.124	-6.16155	1.26702	-4.86303	1.156e-06	1.3318e-05
ENSG00000234518	24.6438	-0.102247	0.526513	-0.194196	0.846023	0.927236
ENSG00000162645	1047.89	-2.64486	0.933767	-2.83246	0.00461911	0.0200482
ENSG00000162654	262.025	-5.63472	1.08992	-5.16984	2.34297e-07	3.12749e-06
ENSG00000154451	54.6273	-3.76836	0.794061	-4.74568	2.07807e-06	2.27052e-05
ENSG00000225492	15.8883	-8.09224	1.38626	-5.83747	5.29991e-09	9.73896e-08
ENSG00000197147	1188.12	0.0386805	0.231216	0.167292	0.867141	0.938695
ENSG00000231999	59.8733	0.744504	0.356769	2.0868	0.0369066	0.110854
ENSG00000230735	5.52089	0.631771	0.95472	0.661734	0.508141	0.706894
ENSG00000171488	2397.63	0.567775	0.250602	2.26565	0.0234731	0.0772343
ENSG00000231613	6.53373	0.741343	1.49986	0.494274	0.621113	0.792979
ENSG00000272931	17.9593	-0.140342	0.747375	-0.18778	0.851049	0.930018
ENSG00000171492	1532.09	0.95782	0.185295	5.16916	2.3515e-07	3.13254e-06
ENSG00000228175	16.9698	0.521892	0.728528	0.716365	0.473766	0.680652
ENSG00000162664	914.931	0.0954598	0.370788	0.257451	0.796831	0.901199
ENSG00000122482	932.325	0.171076	0.520778	0.328501	0.742533	0.870397
ENSG00000097046	87.893	0.621166	0.682396	0.910272	0.362679	0.580222
ENSG00000230667	5.4735	-2.2632	1.03142	-2.19426	0.0282169	0.0897332
ENSG00000174842	162.857	0.727276	0.304633	2.38739	0.0169687	0.0591991
ENSG00000122484	419.518	0.447981	0.376208	1.19078	0.233739	0.433219
ENSG00000162676	47.0935	0.959558	0.425153	2.25697	0.0240097	0.0786911
ENSG00000067208	1429.1	0.371801	0.331366	1.12203	0.261851	0.46755
ENSG00000225505	4.41931	-1.44096	1.19012	-1.21076	0.225986	0.423917
ENSG00000122406	7647.21	1.41176	0.203614	6.93353	4.10477e-12	1.23573e-10
ENSG00000154511	81.1102	0.773069	0.442453	1.74723	0.0805967	0.20217
ENSG00000207523	5.11463	0.167221	1.11406	0.150101	0.880685	0.945196
ENSG00000143033	951.959	0.245389	0.346505	0.708185	0.47883	0.684849
ENSG00000117500	4437.38	-0.0885172	0.394908	-0.224146	0.822643	0.915646
ENSG00000122483	197.78	0.80583	0.599909	1.34325	0.17919	0.3633
ENSG00000223745	330.745	-0.372493	0.309546	-1.20335	0.22884	0.427304
ENSG00000117505	2227.27	0.0898072	0.147984	0.606872	0.543936	0.735107
ENSG00000137942	525.658	0.312164	0.476479	0.655147	0.512373	0.710148
ENSG00000137936	341.214	0.316998	0.356719	0.88865	0.374191	0.591568
ENSG00000224093	7.55264	0.812594	1.07139	0.758452	0.448181	0.659609
ENSG00000260464	17.9989	1.44059	0.703531	2.04766	0.0405933	0.119316
ENSG00000067334	1169.65	0.138065	0.527273	0.261848	0.793439	0.89967
ENSG00000023909	1152.48	-0.237298	0.162276	-1.46231	0.143655	0.310043
ENSG00000137962	4.54081	3.54879	3.03335	1.16992	0.242032	0.44282
ENSG00000117528	772.463	0.757061	0.380007	1.99223	0.046346	0.132304
ENSG00000117525	958.798	0.765248	1.05261	0.726999	0.467227	0.675322
ENSG00000117519	41.5908	1.80244	1.85817	0.970007	0.332043	0.548852
ENSG00000172339	192.573	0.35455	0.244813	1.44825	0.147547	0.316452
ENSG00000122481	40.2781	0.0971812	0.669324	0.145193	0.884558	0.946789
ENSG00000228852	11.8012	0.51861	0.73926	0.701526	0.482975	0.688291
ENSG00000228502	115.341	0.206563	0.392163	0.526726	0.598384	0.775715
ENSG00000137970	188.813	1.13145	0.209768	5.39382	6.89768e-08	1.01287e-06
ENSG00000117569	154.972	0.0289577	0.584414	0.04955	0.960481	0.984435
ENSG00000188641	5565.87	0.167114	0.204298	0.81799	0.413363	0.628854
ENSG00000232878	11.8772	0.320702	0.927816	0.345652	0.729604	0.863838
ENSG00000228057	11.5491	0.785513	0.929078	0.845475	0.397846	0.614689
ENSG00000270911	5.15262	0.360627	1.33527	0.270077	0.787101	0.896704
ENSG00000225206	8.84937	-2.27103	1.4245	-1.59427	0.110876	0.256477
ENSG00000162627	128.938	-0.418481	0.548255	-0.763296	0.445287	0.657372
ENSG00000156869	264.026	0.221356	0.292041	0.757963	0.448473	0.659609
ENSG00000162688	930.314	0.797117	0.458004	1.74041	0.0817863	0.204353
ENSG00000117620	341.981	0.156964	0.54585	0.287559	0.773684	0.888768
ENSG00000283761	6.63534	-1.83562	0.979516	-1.87401	0.0609291	0.163365
ENSG00000156875	86.6869	-0.761624	0.270713	-2.8134	0.004902	0.0210637
ENSG00000156876	140.735	0.137196	0.598154	0.229366	0.818584	0.913784
ENSG00000122435	187.239	0.860715	0.474383	1.81439	0.0696177	0.180979
ENSG00000122477	31.4521	1.31716	0.980815	1.34292	0.179297	0.363418
ENSG00000137992	857.865	0.0477922	0.300158	0.159223	0.873493	0.941986
ENSG00000224616	11.9062	-0.51066	1.15812	-0.440939	0.659257	0.818075
ENSG00000137996	2639.18	-0.310218	0.143019	-2.16907	0.0300773	0.0943268
ENSG00000079335	273.924	-0.71254	0.244524	-2.91399	0.00356843	0.0160844
ENSG00000181656	4.02764	3.34429	1.45226	2.30282	0.0212891	0.0712359
ENSG00000162692	79.2001	1.20115	0.89855	1.33677	0.181299	0.36647
ENSG00000162694	226.315	2.03298	0.298173	6.81812	9.22386e-12	2.64805e-10
ENSG00000162695	1603.69	-0.133155	0.261241	-0.5097	0.610261	0.784622
ENSG00000117543	274.392	0.896135	0.181341	4.94172	7.74378e-07	9.26867e-06
ENSG00000235795	8.72659	0.303739	0.974326	0.311743	0.755236	0.877395
ENSG00000233184	33.1839	0.801316	0.473965	1.69066	0.090901	0.221184
ENSG00000225938	6.15439	2.79017	1.72468	1.61779	0.105708	0.247837
ENSG00000170989	1032.57	1.84735	0.555222	3.32723	0.000877143	0.00490551
ENSG00000183298	18.6478	1.12622	0.631558	1.78324	0.0745475	0.190568
ENSG00000060718	124.95	6.06236	1.91426	3.16695	0.00154045	0.0079218
ENSG00000185946	354.483	0.00695832	0.423811	0.0164185	0.986901	0.996103
ENSG00000240038	97.7679	0.685584	0.492247	1.39276	0.163691	0.341214
ENSG00000198890	512.328	0.186666	0.159456	1.17065	0.24174	0.442489
ENSG00000224550	25.4107	0.929098	0.476302	1.95065	0.051099	0.142687
ENSG00000134215	2433.48	0.0891351	0.291927	0.305333	0.760112	0.880427
ENSG00000226822	9.77976	-1.02612	1.51104	-0.679083	0.497085	0.698357
ENSG00000085491	4015.91	0.0434419	0.268371	0.161873	0.871406	0.940945
ENSG00000280186	5.53741	-2.72834	1.32694	-2.05612	0.0397711	0.117639
ENSG00000162636	1598.42	0.912579	0.283862	3.21487	0.00130505	0.00686998
ENSG00000162639	134.067	0.434567	0.307491	1.41327	0.157577	0.332262
ENSG00000134186	2213.91	0.80612	0.299846	2.68844	0.00717863	0.0289734
ENSG00000116266	1823.89	-0.428734	0.437344	-0.980312	0.326932	0.542804
ENSG00000121957	226.594	0.351004	0.365842	0.959441	0.337336	0.554686
ENSG00000121940	648.174	0.238638	0.181926	1.31173	0.189612	0.377074
ENSG00000085433	1022.56	-1.11941	0.269124	-4.15948	3.18974e-05	0.000266157
ENSG00000244716	65.2269	0.560076	0.439901	1.27319	0.202952	0.394275
ENSG00000197780	1341.71	-0.0700244	0.208197	-0.336337	0.736616	0.867239
ENSG00000273382	23.3161	-0.000569381	0.593522	-0.000959326	0.999235	0.99979
ENSG00000215717	2081.31	-0.521639	0.159853	-3.26323	0.00110148	0.0059453
ENSG00000251484	3.71392	-0.116001	1.69356	-0.0684956	0.945391	0.977414
ENSG00000116299	37.9741	-0.450471	0.5682	-0.792804	0.427892	0.642457
ENSG00000031698	3295.91	0.0890563	0.2363	0.376879	0.706264	0.850272
ENSG00000143126	377.741	1.84916	0.390495	4.73543	2.18594e-06	2.3792e-05
ENSG00000134222	293.886	1.76453	0.281881	6.25985	3.85354e-10	8.59626e-09
ENSG00000134243	7060.46	0.408188	0.132872	3.07203	0.0021261	0.0103964
ENSG00000143106	2943.25	-0.260989	0.148454	-1.75804	0.0787406	0.198976
ENSG00000143028	16.3392	0.262994	0.753593	0.348987	0.727099	0.86272
ENSG00000162650	186.231	-0.895194	0.230603	-3.88197	0.000103616	0.00075711
ENSG00000174151	1329.12	-0.132338	0.173389	-0.763246	0.445317	0.657372
ENSG00000181754	39.3816	0.428551	0.609443	0.703185	0.48194	0.687396
ENSG00000156097	3.98187	0.956702	1.80882	0.528908	0.596869	0.7751
ENSG00000065135	3674.07	-0.0530347	0.250555	-0.211669	0.832365	0.920394
ENSG00000116337	1692.31	-0.382522	0.270022	-1.41663	0.156591	0.330717
ENSG00000168765	957.71	0.588652	0.278741	2.11182	0.034702	0.105545
ENSG00000213366	117.143	2.62954	0.593087	4.43365	9.265e-06	8.74371e-05
ENSG00000134184	114.202	1.17767	0.553245	2.12866	0.0332828	0.102144
ENSG00000134202	601.251	-0.786701	0.603952	-1.30259	0.192715	0.381177
ENSG00000224927	8.38164	2.64963	1.61407	1.64159	0.100675	0.238921
ENSG00000228420	6.65206	0.0520295	1.14467	0.0454538	0.963746	0.985791
ENSG00000184371	6523.05	-0.678001	0.817486	-0.829373	0.406893	0.622405
ENSG00000168710	5418.24	0.547478	0.183049	2.99088	0.00278174	0.013039
ENSG00000143093	1504.97	-0.215585	0.168479	-1.2796	0.200687	0.391589
ENSG00000258634	152.255	-0.315466	0.247534	-1.27444	0.202509	0.393594
ENSG00000197106	35.5044	-0.108469	2.0115	-0.0539246	0.956995	0.982132
ENSG00000116396	117.569	0.482156	0.472335	1.02079	0.307353	0.520863
ENSG00000227963	11.6131	0.784466	0.701303	1.11858	0.263317	0.469365
ENSG00000162775	614.788	0.317794	0.174892	1.81709	0.069203	0.180232
ENSG00000224699	30.9076	1.33657	0.587878	2.27354	0.0229934	0.0758623
ENSG00000168679	25.4748	0.818101	0.62647	1.30589	0.19159	0.379673
ENSG00000273373	40.6979	0.354665	0.598485	0.592605	0.553446	0.742312
ENSG00000134248	1616.48	0.0698287	0.211173	0.330671	0.740893	0.869504
ENSG00000143105	7.48883	0.809122	1.70906	0.473432	0.635905	0.801764
ENSG00000177301	34.4351	0.552677	1.33203	0.414914	0.678205	0.831399
ENSG00000259834	13.8403	-2.15893	1.0794	-2.00012	0.0454878	0.130269
ENSG00000177272	9.98505	-3.39032	1.40005	-2.42157	0.0154538	0.0549201
ENSG00000237415	5.11899	-1.56538	1.14107	-1.37185	0.170109	0.351298
ENSG00000143119	22368.6	-0.501325	0.157486	-3.1833	0.00145606	0.00754657
ENSG00000261654	18.2977	-1.1119	0.655511	-1.69623	0.0898416	0.219358
ENSG00000232811	18.1046	0.0815786	0.650318	0.125444	0.900172	0.956062
ENSG00000121931	586.592	-0.414966	0.263098	-1.57723	0.114743	0.262889
ENSG00000273010	8.69252	-2.75494	0.814517	-3.38229	0.00071883	0.00412734
ENSG00000156171	2532.67	-0.216544	0.240469	-0.900506	0.367851	0.585302
ENSG00000134255	1947.12	-0.466403	0.196557	-2.37286	0.017651	0.0611703
ENSG00000162777	1145.45	-0.51234	0.284468	-1.80105	0.0716954	0.185224
ENSG00000064886	4508.31	-7.72663	0.469207	-16.4674	6.28972e-61	6.92183e-58
ENSG00000173947	6.54931	-2.64318	1.7755	-1.4887	0.136567	0.298825
ENSG00000085465	10.7259	0.352481	0.856854	0.411366	0.680804	0.833089
ENSG00000260948	13.3787	2.55353	0.758822	3.36513	0.000765085	0.00436132
ENSG00000233337	20.1089	0.911628	0.670371	1.35988	0.173866	0.356387
ENSG00000243960	6.78571	2.51196	1.09489	2.29425	0.0217761	0.0726566
ENSG00000116455	1151.28	1.7633	0.296161	5.95387	2.61867e-09	5.08063e-08
ENSG00000199890	4.60805	2.34178	1.47889	1.58347	0.113315	0.260491
ENSG00000116459	6170.6	1.14614	0.16291	7.03542	1.98657e-12	6.25626e-11
ENSG00000143110	2231.28	1.47799	0.445247	3.31948	0.000901853	0.00502244
ENSG00000121933	3800.48	1.33526	0.289568	4.61123	4.00302e-06	4.10859e-05
ENSG00000200360	4.28863	2.50877	1.76856	1.41853	0.156035	0.329836
ENSG00000282608	4627.61	3.02209	0.389657	7.75575	8.78209e-15	3.84877e-13
ENSG00000116473	8765.14	0.0910795	0.186944	0.487202	0.626115	0.795909
ENSG00000231346	126.85	-0.0148269	0.395991	-0.0374425	0.970132	0.988699
ENSG00000215867	13.7707	-0.225908	0.910081	-0.248228	0.803958	0.904551
ENSG00000197852	1549.86	-0.304873	0.375848	-0.81116	0.417274	0.632811
ENSG00000064703	953.626	0.157863	0.215123	0.733825	0.463056	0.672374
ENSG00000171385	7.83473	-0.311575	1.70255	-0.183005	0.854794	0.932567
ENSG00000143079	1717.98	-0.381162	0.21649	-1.76064	0.0782987	0.198061
ENSG00000134245	92.6158	-0.0694846	0.446001	-0.155795	0.876195	0.943253
ENSG00000007341	268.935	-0.222051	0.247911	-0.895689	0.370419	0.588081
ENSG00000116489	10507.4	-0.0313953	0.205835	-0.152527	0.878772	0.944268
ENSG00000235299	7.33517	0.287286	0.896248	0.320543	0.748556	0.874011
ENSG00000155363	1622.12	-1.45617	0.199896	-7.28464	3.2253e-13	1.13683e-11
ENSG00000225075	7.532	-2.18262	0.768544	-2.83994	0.00451221	0.0196488
ENSG00000155366	2392.41	-0.938397	0.230773	-4.06632	4.77604e-05	0.000381794
ENSG00000155367	8.40779	0.23234	1.59803	0.145391	0.884402	0.946775
ENSG00000184599	16.4207	3.03924	1.77813	1.70924	0.0874066	0.214606
ENSG00000215866	33.8445	6.65987	1.14494	5.81679	5.99881e-09	1.09485e-07
ENSG00000224167	4.209	4.8052	1.40163	3.4283	0.00060737	0.00357203
ENSG00000155380	1974.02	1.67574	0.353974	4.73408	2.20052e-06	2.39243e-05
ENSG00000229020	4.71629	1.75079	1.19329	1.4672	0.142322	0.308049
ENSG00000226419	113.086	1.21516	0.298491	4.07102	4.68082e-05	0.000375091
ENSG00000238198	19.459	0.794411	0.619041	1.28329	0.19939	0.390017
ENSG00000198799	526.522	0.574137	0.14264	4.02508	5.69561e-05	0.000445593
ENSG00000081026	125.74	-1.8936	0.451979	-4.18957	2.79488e-05	0.000236698
ENSG00000232499	11.8812	0.532873	0.742631	0.717547	0.473037	0.680098
ENSG00000116793	909.394	-0.25771	0.215038	-1.19844	0.230747	0.429714
ENSG00000232450	11.685	-0.104077	0.980671	-0.106128	0.915481	0.964153
ENSG00000081019	699.277	-0.397379	0.167483	-2.37266	0.0176605	0.0611815
ENSG00000231128	8.85552	1.84696	1.41383	1.30635	0.191433	0.379437
ENSG00000134242	823.97	1.27068	0.633074	2.00716	0.0447328	0.128758
ENSG00000226167	14.947	0.673348	0.768732	0.875921	0.381073	0.599054
ENSG00000134262	362.023	0.185545	0.154136	1.20378	0.228676	0.427207
ENSG00000118655	1061.18	-0.70938	0.203055	-3.49353	0.000476677	0.00288321
ENSG00000235527	8.91322	-0.927949	0.945449	-0.98149	0.326351	0.542158
ENSG00000163349	4691.67	-0.10385	0.114924	-0.903639	0.366187	0.583759
ENSG00000116774	6390.37	5.78364	0.98784	5.85484	4.77481e-09	8.81493e-08
ENSG00000134207	643.284	3.90737	0.616249	6.34057	2.2892e-10	5.26064e-09
ENSG00000197323	2016.19	-0.26754	0.272483	-0.981859	0.326169	0.541992
ENSG00000236480	21.2446	0.224298	0.66217	0.338732	0.734812	0.866502
ENSG00000116752	631.551	-0.454427	0.353417	-1.28581	0.198509	0.38877
ENSG00000175984	27.764	-0.803472	0.379125	-2.11928	0.034067	0.10398
ENSG00000213281	3407.46	-0.525096	0.212713	-2.46856	0.0135657	0.0494156
ENSG00000009307	15614.5	0.415152	0.162007	2.56255	0.0103905	0.039559
ENSG00000201900	3.80819	1.4659	1.1287	1.29875	0.19403	0.382556
ENSG00000052723	804.641	0.110394	0.328874	0.335674	0.737117	0.867487
ENSG00000134198	10.2533	6.405	1.77958	3.59916	0.000319252	0.00203056
ENSG00000173218	338.013	0.2082	0.18144	1.14749	0.251179	0.454145
ENSG00000163393	302.014	-0.355394	0.260618	-1.36366	0.172675	0.354891
ENSG00000163399	14739	0.0636161	0.19222	0.330954	0.740679	0.869504
ENSG00000203865	19.0685	0.269577	0.621639	0.433655	0.664539	0.822381
ENSG00000233154	5.19816	-1.61208	1.52725	-1.05554	0.291179	0.502305
ENSG00000224950	102.32	-0.317103	0.476847	-0.665001	0.50605	0.704897
ENSG00000116815	925.465	-0.551269	0.254734	-2.1641	0.0304568	0.095341
ENSG00000177173	34.9208	-0.762487	0.707484	-1.07774	0.281148	0.49059
ENSG00000143061	513.217	0.665665	0.506788	1.3135	0.189015	0.376339
ENSG00000116824	8.57062	1.80805	1.71594	1.05368	0.292028	0.503463
ENSG00000134247	4190.43	1.04321	0.22972	4.54123	5.59279e-06	5.53938e-05
ENSG00000134256	2511.41	1.01176	0.427862	2.36468	0.0180457	0.0622116
ENSG00000236137	21.4875	-0.275118	0.608734	-0.451952	0.651304	0.81209
ENSG00000116830	839.183	0.577353	0.234339	2.46375	0.0137491	0.0500011
ENSG00000134253	33.2989	2.06225	0.713594	2.88995	0.00385302	0.0171747
ENSG00000198162	1478.3	0.62875	0.3484	1.80468	0.0711251	0.184196
ENSG00000183508	29.6281	-0.916572	1.05519	-0.868629	0.38505	0.602607
ENSG00000228217	17.6226	-0.420587	0.59346	-0.708703	0.478509	0.684525
ENSG00000196505	905.63	-0.0991026	0.228986	-0.432789	0.665168	0.8228
ENSG00000065183	738.926	1.09526	0.185334	5.90963	3.42878e-09	6.54342e-08
ENSG00000092607	55.8399	1.68741	0.947786	1.78037	0.0750154	0.191591
ENSG00000116874	151.544	0.885865	0.30058	2.94719	0.0032068	0.0147252
ENSG00000231365	82.5072	0.752275	0.342117	2.19888	0.0278864	0.0889536
ENSG00000260941	19.9273	0.70527	0.973303	0.724615	0.468688	0.676596
ENSG00000198857	26.2813	-0.430833	0.944325	-0.456233	0.648222	0.810252
ENSG00000143067	1576.64	-1.84949	0.392532	-4.7117	2.45656e-06	2.65044e-05
ENSG00000092621	42.7228	1.52095	0.791639	1.92127	0.0546981	0.150467
ENSG00000261662	22.1289	-1.42864	0.551021	-2.59271	0.00952217	0.0367861
ENSG00000134250	8085.63	-1.04893	0.208438	-5.03233	4.84557e-07	6.09047e-06
ENSG00000265808	7256.82	-1.42638	0.189491	-7.52743	5.17479e-14	2.03388e-12
ENSG00000274642	17.8136	-1.43935	0.767285	-1.8759	0.060669	0.162822
ENSG00000223804	22.5013	-2.32698	0.899388	-2.58729	0.00967338	0.0372367
ENSG00000270392	27.4182	-0.401002	0.552425	-0.725895	0.467903	0.676054
ENSG00000270231	418.165	-1.02755	0.27658	-3.71519	0.000203049	0.00136996
ENSG00000275131	611.128	-2.67254	0.520031	-5.13919	2.75922e-07	3.6269e-06
ENSG00000273694	5.14148	-3.46367	1.33201	-2.60033	0.00931344	0.0361249
ENSG00000273136	383.556	-1.11636	0.272592	-4.09535	4.21532e-05	0.000341798
ENSG00000281741	4.64405	-2.29325	1.21684	-1.88458	0.059486	0.160517
ENSG00000226067	148.919	-2.43094	0.446576	-5.44351	5.22396e-08	7.80403e-07
ENSG00000277610	5.248	-4.30397	1.73532	-2.48021	0.0131304	0.0481044
ENSG00000198019	745.39	-0.152343	0.216344	-0.704172	0.481326	0.687128
ENSG00000233029	124.75	0.193353	0.309022	0.625695	0.531515	0.725542
ENSG00000223345	5.78291	-0.742525	1.73371	-0.428286	0.668443	0.825037
ENSG00000188610	110.694	0.221193	0.360428	0.613696	0.539416	0.731869
ENSG00000171943	905.536	0.0291346	0.30075	0.096873	0.922827	0.968082
ENSG00000230806	11.005	-0.916467	1.12135	-0.81729	0.413763	0.629299
ENSG00000227082	37.7915	-0.531237	0.704637	-0.753916	0.4509	0.661326
ENSG00000231429	5.35393	-1.51015	1.06011	-1.42452	0.154295	0.327179
ENSG00000231752	12.9232	0.0764467	1.03824	0.0736309	0.941304	0.975429
ENSG00000232721	9.85547	0.549119	1.65107	0.332584	0.739449	0.868786
ENSG00000265531	477.551	0.01103	0.759967	0.0145138	0.98842	0.996568
ENSG00000240929	6.4861	0.558357	1.65381	0.337619	0.73565	0.866791
ENSG00000234571	124.305	0.704158	2.3523	0.299349	0.764674	0.883241
ENSG00000263513	10.7688	1.39904	1.52605	0.91677	0.359263	0.577017
ENSG00000270872	43.347	-0.749545	1.94953	-0.384475	0.700627	0.84693
ENSG00000266338	437.629	-0.486597	0.30116	-1.61575	0.106149	0.248577
ENSG00000196369	548.976	-0.176173	0.238234	-0.739496	0.459606	0.669239
ENSG00000215784	37.3155	0.0822612	0.581125	0.141555	0.887432	0.948181
ENSG00000272419	38.0345	-2.71346	0.671202	-4.04268	5.2843e-05	0.000417205
ENSG00000281571	19.8101	-2.08757	0.553024	-3.77482	0.000160125	0.00111139
ENSG00000223612	18.6774	-2.16528	0.596169	-3.63199	0.000281239	0.00181823
ENSG00000162825	63.2243	0.391233	0.286909	1.36361	0.172689	0.354891
ENSG00000234367	7.18053	0.42024	1.56723	0.268143	0.788589	0.897413
ENSG00000272150	25.8127	-1.11258	0.521747	-2.13241	0.0329734	0.101396
ENSG00000117262	125.814	0.246962	0.316358	0.780642	0.435013	0.648103
ENSG00000174827	8.87919	0.0995608	0.892387	0.111567	0.911167	0.962527
ENSG00000117281	22.6236	-1.17744	0.763744	-1.54167	0.123153	0.277125
ENSG00000265491	1418.16	-0.369636	0.143636	-2.57341	0.0100701	0.0385094
ENSG00000186141	1090.73	-0.231225	0.155484	-1.48713	0.136981	0.299465
ENSG00000186364	69.1856	0.204121	0.299841	0.680763	0.496021	0.697685
ENSG00000131788	674.991	-0.765908	0.202082	-3.79009	0.000150591	0.00105483
ENSG00000198483	206.712	0.752115	0.384818	1.95447	0.0506458	0.141687
ENSG00000143127	20.1086	-0.723542	0.681411	-1.06183	0.288313	0.498925
ENSG00000131779	702.412	0.00970012	0.26614	0.0364474	0.970926	0.988824
ENSG00000265241	1371.83	0.198452	0.143441	1.38351	0.166509	0.345443
ENSG00000211451	13.6989	0.643615	0.993513	0.647817	0.517103	0.713851
ENSG00000234222	8.83343	-0.948233	0.719948	-1.31709	0.18781	0.374768
ENSG00000271601	680.771	0.243796	0.217659	1.12008	0.262678	0.46852
ENSG00000272031	15.5972	0.438362	0.604302	0.725403	0.468205	0.676189
ENSG00000121851	448.658	-0.361643	0.205196	-1.76242	0.0779982	0.197503
ENSG00000265972	12867.5	-0.502298	0.375028	-1.33936	0.180454	0.365128
ENSG00000233396	6.83915	0.00909038	1.08965	0.0083425	0.993344	0.998202
ENSG00000271425	120.817	-0.934395	0.306017	-3.05341	0.00226253	0.0109293
ENSG00000264343	34.0045	-0.733253	0.618719	-1.18512	0.235972	0.435514
ENSG00000277406	45.4225	-2.03518	0.656418	-3.10043	0.00193238	0.0095816
ENSG00000268043	732.986	-0.551656	0.156997	-3.51381	0.000441735	0.00269643
ENSG00000244371	18.7877	-0.404158	0.732543	-0.551719	0.581141	0.76217
ENSG00000131791	469.269	-0.177128	0.152267	-1.16327	0.244719	0.445965
ENSG00000237188	30.9267	-0.414235	0.523161	-0.791792	0.428482	0.642967
ENSG00000131781	115.439	0.259475	0.359965	0.720833	0.471012	0.67832
ENSG00000180867	84.134	-0.631711	0.300107	-2.10495	0.0352955	0.106906
ENSG00000226015	20.9619	-0.562178	0.643814	-0.8732	0.382554	0.60055
ENSG00000131778	1403.61	0.915689	0.15306	5.98255	2.19674e-09	4.31698e-08
ENSG00000278811	22.0043	0.986524	0.623804	1.58146	0.113772	0.26124
ENSG00000116128	412.488	-0.147856	0.205096	-0.720912	0.470964	0.678299
ENSG00000162836	82.1979	0.970792	0.380766	2.54958	0.0107854	0.0409028
ENSG00000265107	5.7054	1.73813	2.04629	0.849406	0.395655	0.612834
ENSG00000188092	97.9402	-0.031265	0.431618	-0.0724367	0.942254	0.975853
ENSG00000215859	6.14386	1.01407	1.32472	0.765493	0.443978	0.656108
ENSG00000229828	5.28715	-5.35999	2.00578	-2.67227	0.00753394	0.0302105
ENSG00000263956	489.291	-0.337254	0.145265	-2.32165	0.0202517	0.0684582
ENSG00000225080	11.1379	-0.950397	0.92087	-1.03206	0.302042	0.514503
ENSG00000198658	21.7244	0.0829615	0.57982	0.143081	0.886226	0.947544
ENSG00000274020	28.9773	-2.55389	0.742938	-3.43756	0.000586991	0.00346889
ENSG00000231551	19.0456	-0.694678	0.721305	-0.963086	0.335504	0.552821
ENSG00000225871	5.84954	-1.24077	1.63462	-0.759056	0.447819	0.659396
ENSG00000280649	27.0119	-1.85302	0.628629	-2.94772	0.00320128	0.0147064
ENSG00000270629	302.756	-0.915691	0.460865	-1.9869	0.0469339	0.133676
ENSG00000178104	9665.78	-2.78948	0.321436	-8.67817	4.02172e-18	2.60347e-16
ENSG00000222788	4.4558	-2.65881	1.43026	-1.85897	0.0630314	0.167596
ENSG00000255148	5.73211	-3.10641	1.18254	-2.62689	0.00861692	0.0337938
ENSG00000269713	461.562	-0.806657	0.367905	-2.19257	0.0283387	0.0899833
ENSG00000274265	25.9502	-2.64703	0.718775	-3.6827	0.000230776	0.00153265
ENSG00000215861	904.186	-2.73921	0.66199	-4.13784	3.50587e-05	0.000289849
ENSG00000274423	12.8043	-1.38802	0.577327	-2.40422	0.0162069	0.0570629
ENSG00000271383	1769.11	-1.88052	0.269775	-6.97068	3.15407e-12	9.68665e-11
ENSG00000277147	122.257	-1.43014	0.422514	-3.38484	0.000712203	0.00409641
ENSG00000275557	27.1192	-1.7932	0.577923	-3.10283	0.00191679	0.00951666
ENSG00000150337	3318.87	-0.0852908	0.254372	-0.335299	0.7374	0.867666
ENSG00000203814	124.188	-3.20826	0.395025	-8.12167	4.59815e-16	2.40965e-14
ENSG00000233030	106.623	-0.809602	0.387234	-2.09073	0.036552	0.109986
ENSG00000270882	46.807	-3.75106	0.794838	-4.71927	2.36687e-06	2.56204e-05
ENSG00000203812	18.334	-2.88345	0.846907	-3.40469	0.000662401	0.00385653
ENSG00000220323	8.61227	-1.09602	1.0944	-1.00147	0.316598	0.531572
ENSG00000261716	130.328	-1.32705	0.49285	-2.69259	0.00708988	0.0286853
ENSG00000203819	8.65566	-1.87504	1.11917	-1.67538	0.0938595	0.226574
ENSG00000272196	17.6581	-4.04667	0.744489	-5.43551	5.46409e-08	8.1321e-07
ENSG00000184678	978.999	-4.17469	0.368419	-11.3314	9.17477e-30	1.69853e-27
ENSG00000184260	18.6778	-2.33993	0.650146	-3.59908	0.000319346	0.00203056
ENSG00000178096	140.418	0.123408	0.326963	0.377439	0.705847	0.850238
ENSG00000159164	6.75943	-3.62262	1.68858	-2.14536	0.0319243	0.098851
ENSG00000143368	2623.66	-0.038981	0.23255	-0.167625	0.866879	0.938598
ENSG00000014914	21.0684	-2.33019	0.885958	-2.63014	0.00853503	0.0335457
ENSG00000264522	1251.82	-0.749367	0.159865	-4.68749	2.76576e-06	2.94712e-05
ENSG00000136631	1284.54	0.546863	0.127418	4.29188	1.77167e-05	0.000156884
ENSG00000023902	8563.83	-1.24029	0.180308	-6.87874	6.03844e-12	1.77735e-10
ENSG00000143401	1293.69	-0.17546	0.421648	-0.416129	0.677315	0.830875
ENSG00000118298	10.5478	-0.179885	0.899068	-0.200079	0.841418	0.92521
ENSG00000117362	7012.42	0.113381	0.266725	0.425086	0.670774	0.826585
ENSG00000118292	311.451	-0.567987	0.313136	-1.81387	0.0696981	0.181116
ENSG00000159208	28.3137	-0.36364	0.755688	-0.481204	0.630372	0.798863
ENSG00000266472	1354.55	0.396363	0.187965	2.10871	0.0349696	0.106114
ENSG00000117360	1327.12	-0.861831	0.098081	-8.78693	1.53704e-18	1.04271e-16
ENSG00000163125	1943.79	-0.204441	0.186162	-1.09819	0.272124	0.480479
ENSG00000143374	1302.32	0.062281	0.227447	0.273826	0.784218	0.895313
ENSG00000143369	2824.73	0.108668	0.41992	0.258783	0.795803	0.900791
ENSG00000237781	40.3118	-0.773626	0.528141	-1.46481	0.142973	0.309075
ENSG00000143382	4249.18	-0.117507	0.252915	-0.464611	0.64221	0.806544
ENSG00000264553	5.0269	0.136099	0.842632	0.161517	0.871686	0.940994
ENSG00000203804	52.7533	-1.86423	0.561139	-3.32223	0.000892999	0.00497873
ENSG00000277452	6.72314	-3.74434	1.21346	-3.08566	0.00203102	0.00999069
ENSG00000274963	8.64663	-4.10024	1.28104	-3.20071	0.00137088	0.00715946
ENSG00000143384	15552.4	-1.42314	0.153564	-9.26742	1.90712e-20	1.59401e-18
ENSG00000143420	5241.03	0.170651	0.252743	0.675197	0.499551	0.700326
ENSG00000143457	756.24	0.320486	0.225052	1.42405	0.154431	0.327319
ENSG00000143452	44.2805	-1.00789	0.687786	-1.46542	0.142808	0.308818
ENSG00000163131	37811.8	-0.756584	0.20851	-3.62852	0.000285052	0.00183809
ENSG00000143387	7452.74	-0.778476	1.04801	-0.74281	0.457597	0.667812
ENSG00000224690	6.45893	-0.969014	1.75226	-0.553007	0.580258	0.761517
ENSG00000143437	3147.88	-0.219058	0.180111	-1.21624	0.223893	0.421227
ENSG00000143379	1434.13	0.0201164	0.224609	0.0895616	0.928636	0.970467
ENSG00000143418	4411.25	-0.191974	0.189235	-1.01447	0.310359	0.523984
ENSG00000231073	7.50376	0.731206	0.914092	0.799925	0.423754	0.638428
ENSG00000143412	158.222	0.55453	0.420279	1.31943	0.187025	0.373804
ENSG00000143409	609.175	-0.199019	0.209414	-0.950361	0.341929	0.559116
ENSG00000143363	490.421	-0.247987	0.265661	-0.933474	0.350575	0.568015
ENSG00000163141	8.25157	-1.13175	1.42977	-0.791562	0.428616	0.643078
ENSG00000143443	59.4146	0.198879	0.49836	0.399067	0.689844	0.839277
ENSG00000197622	9007.75	-0.578408	0.1306	-4.42885	9.47352e-06	8.91501e-05
ENSG00000213190	475.371	-0.680558	0.279352	-2.4362	0.0148425	0.053129
ENSG00000143458	748.228	0.0083417	0.144238	0.0578328	0.953882	0.981252
ENSG00000143434	24.0897	-0.383816	0.639502	-0.60018	0.548386	0.738621
ENSG00000163154	2162.52	0.448084	0.347187	1.29061	0.196838	0.386171
ENSG00000163156	1823.72	0.35648	0.294524	1.21036	0.226141	0.424086
ENSG00000163155	175.102	-0.640456	0.336488	-1.90335	0.0569944	0.15566
ENSG00000163159	1058.9	-0.35558	0.268054	-1.32652	0.184667	0.370888
ENSG00000143398	2159.86	-0.567928	0.160421	-3.54023	0.000399781	0.00247709
ENSG00000159352	5998.46	-0.671089	0.20103	-3.33825	0.000843086	0.00474586
ENSG00000232671	7.2162	-1.77561	0.896429	-1.98076	0.0476178	0.13506
ENSG00000143373	2360.34	-0.843422	0.26348	-3.20109	0.00136909	0.00715196
ENSG00000143393	3423.54	-0.33312	0.226296	-1.47205	0.141007	0.305669
ENSG00000143390	1808.5	-0.472324	0.244114	-1.93485	0.0530091	0.146902
ENSG00000143416	40.161	3.35408	1.42927	2.34671	0.0189401	0.0646645
ENSG00000159377	4668.93	-0.534348	0.211491	-2.52658	0.0115179	0.0431522
ENSG00000143442	2430.61	-0.45859	0.178673	-2.56665	0.0102688	0.0391632
ENSG00000143375	97.8842	-1.7853	0.5655	-3.15703	0.00159384	0.0081309
ENSG00000143367	448.311	-1.15104	0.204898	-5.6176	1.9363e-08	3.19103e-07
ENSG00000250734	4.92301	0.173694	1.19005	0.145955	0.883957	0.946503
ENSG00000143376	4422.62	0.0109661	0.151647	0.0723136	0.942352	0.975853
ENSG00000143436	643.519	-0.101477	0.241276	-0.420587	0.674057	0.828596
ENSG00000143450	72.3369	-0.258521	0.384623	-0.672141	0.501494	0.70186
ENSG00000249602	52.9206	-1.06957	0.52073	-2.05398	0.0399776	0.118034
ENSG00000268288	4.896	1.32025	1.13966	1.15847	0.246674	0.448331
ENSG00000182134	1150.47	-0.18407	0.167242	-1.10062	0.271061	0.479373
ENSG00000203288	9.87695	-0.690482	0.722005	-0.956339	0.338901	0.555966
ENSG00000225556	4.73865	-0.836706	1.20045	-0.696996	0.485805	0.689744
ENSG00000234614	9.11471	-1.09521	0.892995	-1.22644	0.220032	0.416516
ENSG00000196407	9.77972	-1.53882	1.14281	-1.34653	0.178132	0.361983
ENSG00000159445	278.818	1.24688	0.244525	5.09918	3.4112e-07	4.40212e-06
ENSG00000197747	6263.47	0.0672904	0.298026	0.225787	0.821367	0.91506
ENSG00000163191	18626.3	-0.628602	0.231747	-2.71244	0.0066789	0.0272788
ENSG00000159450	94.2918	-1.23163	0.442536	-2.78312	0.00538389	0.0227835
ENSG00000143631	12.7188	-0.00699525	1.37534	-0.00508619	0.995942	0.998455
ENSG00000163207	4.27733	1.66656	3.53334	0.471666	NA	NA
ENSG00000163218	4.33765	-0.479832	1.12044	-0.428254	0.668466	0.825037
ENSG00000163220	48040.7	-2.26207	0.381183	-5.93433	2.95051e-09	5.66892e-08
ENSG00000163221	2106.46	-4.67748	0.475355	-9.83998	7.57236e-23	8.02143e-21
ENSG00000143546	5648.03	-2.96213	0.417383	-7.09692	1.27567e-12	4.16992e-11
ENSG00000238279	5.16794	-0.938074	1.4041	-0.668096	0.504072	0.703221
ENSG00000197956	6050.31	0.00870164	0.438877	0.0198271	0.984181	0.99493
ENSG00000196420	13.5834	2.51821	0.873331	2.88345	0.00393341	0.0175055
ENSG00000196154	12118.4	1.99808	0.373837	5.3448	9.05193e-08	1.30029e-06
ENSG00000188015	64.0073	-1.45894	0.623661	-2.33931	0.0193193	0.0657668
ENSG00000196754	19.1938	-0.295279	0.746391	-0.395609	0.692393	0.841139
ENSG00000188643	38.3554	1.9079	1.33434	1.42985	0.15276	0.324542
ENSG00000189171	76.2306	0.513187	0.295943	1.73407	0.0829055	0.206368
ENSG00000160678	30.9114	-0.214831	0.411975	-0.521466	0.602042	0.778673
ENSG00000160679	2311.12	-0.087986	0.187775	-0.468572	0.639375	0.804458
ENSG00000143553	1208.98	-0.2529	0.231759	-1.09122	0.275176	0.483595
ENSG00000143621	3937.38	0.0940628	0.232719	0.40419	0.686073	0.836421
ENSG00000169418	55.9152	-0.939401	0.968737	-0.969718	0.332187	0.549003
ENSG00000143624	1469.54	-0.131381	0.137733	-0.953885	0.340142	0.557171
ENSG00000143554	1257.26	-0.744766	0.396443	-1.87862	0.0602964	0.162152
ENSG00000143614	2014.03	-0.786227	0.184263	-4.26687	1.98238e-05	0.000173833
ENSG00000223599	4.52917	0.713679	1.23271	0.578952	0.562621	0.748638
ENSG00000198837	5005.16	0.00562501	0.15514	0.0362577	0.971077	0.988824
ENSG00000160741	2236.05	-1.18623	0.141651	-8.37433	5.55387e-17	3.22629e-15
ENSG00000143570	9681.04	-0.945511	0.20053	-4.71506	2.41641e-06	2.61138e-05
ENSG00000282386	35.1229	-2.11729	0.38604	-5.48463	4.14328e-08	6.30856e-07
ENSG00000273026	19.7796	-2.02036	0.555416	-3.63756	0.000275236	0.00178759
ENSG00000143578	105.608	-0.334838	0.410529	-0.815626	0.414714	0.630037
ENSG00000143543	3836.44	-0.189577	0.241405	-0.785307	0.432274	0.646208
ENSG00000272654	38.7239	-0.473494	0.364225	-1.3	0.1936	0.382202
ENSG00000143545	5679.26	-1.72658	0.244534	-7.06069	1.65677e-12	5.29337e-11
ENSG00000177954	7669.86	0.607466	0.331589	1.83198	0.0669537	0.175853
ENSG00000143549	27944	-0.54	0.158185	-3.41373	0.000640795	0.00374219
ENSG00000264384	6.47838	-1.25567	1.24974	-1.00474	0.315022	0.530005
ENSG00000143612	6398.55	-0.0816331	0.218132	-0.374237	0.708228	0.851802
ENSG00000143569	6011.56	-0.0268551	0.181855	-0.147673	0.882601	0.945976
ENSG00000143575	1769.38	-0.241415	0.268673	-0.898543	0.368896	0.586379
ENSG00000143515	315.688	-1.10622	0.403697	-2.74024	0.0061395	0.0254429
ENSG00000226855	7.42379	2.08014	1.12635	1.8468	0.0647755	0.1712
ENSG00000228013	58.6028	0.962227	0.8977	1.07188	0.283774	0.493181
ENSG00000160712	6007.37	1.26678	0.392519	3.22732	0.00124957	0.00662725
ENSG00000169291	193.081	1.2256	0.419175	2.92383	0.00345754	0.0156641
ENSG00000163239	21.5662	1.5506	0.744	2.08414	0.037147	0.111404
ENSG00000160714	2701.65	-0.238525	0.176316	-1.35283	0.176111	0.359425
ENSG00000229780	4.44312	1.15981	1.60433	0.722928	0.469724	0.677203
ENSG00000160716	5.80757	-2.26564	1.33899	-1.69205	0.0906362	0.220675
ENSG00000160710	14553.2	-1.06246	0.188137	-5.64726	1.63028e-08	2.72295e-07
ENSG00000143603	23.0848	0.084629	1.20642	0.0701486	0.944075	0.976727
ENSG00000163344	883.921	0.789596	0.267979	2.94648	0.00321413	0.0147415
ENSG00000163346	3102.24	-0.554186	0.251732	-2.20149	0.0277014	0.0884632
ENSG00000163348	1311.85	0.26481	0.24617	1.07572	0.282053	0.491283
ENSG00000160691	2299.38	-0.225553	0.176868	-1.27526	0.202216	0.393369
ENSG00000173207	395.988	1.38995	0.235983	5.89005	3.86084e-09	7.3256e-08
ENSG00000160688	903.124	-0.108887	0.203186	-0.535899	0.592028	0.771393
ENSG00000160685	5886.83	-0.348351	0.210884	-1.65186	0.0985629	0.235233
ENSG00000163354	4.62684	0.721378	1.20425	0.599025	0.549156	0.739161
ENSG00000163357	7.41384	1.70178	1.0446	1.62912	0.103287	0.243651
ENSG00000232093	7.75475	4.4294	1.59451	2.77792	0.00547086	0.0230727
ENSG00000143537	2404.94	2.28043	0.292673	7.79171	6.61108e-15	2.96287e-13
ENSG00000243364	144.446	-0.587481	0.278415	-2.11009	0.0348502	0.105882
ENSG00000143590	10.6326	-1.16523	0.862129	-1.35157	0.176512	0.359762
ENSG00000169242	5.07932	-2.24751	1.85882	-1.2091	0.226623	0.424549
ENSG00000169241	1066.5	-0.0351006	0.175922	-0.199523	0.841853	0.925431
ENSG00000179085	518.243	0.673358	0.308677	2.18143	0.0291516	0.0919383
ENSG00000163463	82.9762	-0.238585	0.353443	-0.675032	0.499655	0.700373
ENSG00000163462	34.237	-0.652313	0.703667	-0.927019	0.353916	0.571618
ENSG00000185499	30.8097	-2.95261	0.769359	-3.83776	0.000124163	0.00089017
ENSG00000231064	12.8493	-2.98646	0.74093	-4.03069	5.56143e-05	0.000435957
ENSG00000169231	203.311	-1.44348	0.335223	-4.30604	1.66201e-05	0.000148368
ENSG00000173171	801.638	-0.262294	0.220772	-1.18807	0.234804	0.434257
ENSG00000160766	139.562	0.132583	0.271731	0.487921	0.625606	0.795606
ENSG00000236675	190.578	-0.50312	0.210057	-2.39516	0.0166132	0.0582153
ENSG00000177628	4847.34	-0.838146	0.150213	-5.57972	2.40906e-08	3.88292e-07
ENSG00000160767	683.213	0.0308329	0.268078	0.115015	0.908433	0.960664
ENSG00000116521	1965.87	-0.00419307	0.177344	-0.0236436	0.981137	0.993221
ENSG00000176444	1176.05	-0.139001	0.153628	-0.904788	0.365578	0.583037
ENSG00000143630	84.6038	-0.649378	0.297924	-2.17968	0.0292815	0.092245
ENSG00000160752	1233.61	-0.0164981	0.178776	-0.0922839	0.926472	0.969674
ENSG00000225855	96.0745	-0.652743	0.309821	-2.10684	0.0351316	0.106543
ENSG00000160753	824.325	0.172377	0.181891	0.947691	0.343287	0.560681
ENSG00000116539	2271.63	-0.360041	0.259032	-1.38995	0.164545	0.34238
ENSG00000237872	6.44621	-0.423064	1.37286	-0.308162	0.757959	0.87899
ENSG00000235919	35.6677	-0.93886	0.471074	-1.99302	0.0462589	0.132114
ENSG00000271267	7.90168	-3.33355	1.13956	-2.92528	0.00344143	0.0156034
ENSG00000225082	5.40284	-1.68694	1.36907	-1.23218	0.217881	0.413647
ENSG00000223503	4.16479	-1.55806	1.27691	-1.22018	0.222397	0.419249
ENSG00000125459	243.424	0.578542	0.261528	2.21216	0.0269554	0.0864993
ENSG00000246203	11.1151	-0.286708	0.827008	-0.346681	0.728831	0.863637
ENSG00000163374	1639.62	-0.708709	0.185767	-3.81505	0.000136155	0.000966006
ENSG00000132676	3072.89	-0.235827	0.171841	-1.37236	0.169952	0.351087
ENSG00000203761	84.9981	0.3665	0.313078	1.17063	0.241746	0.442489
ENSG00000116580	2005.54	-0.584313	0.128659	-4.54156	5.58401e-06	5.53345e-05
ENSG00000234937	4.30414	-2.21984	1.63454	-1.35808	0.174437	0.357187
ENSG00000132718	1400.74	-2.39093	0.364229	-6.56436	5.22568e-11	1.34436e-09
ENSG00000143622	3877.98	-1.21657	0.180183	-6.75189	1.45935e-11	4.08308e-10
ENSG00000132680	1116.97	-0.0498018	0.0928075	-0.536614	0.591535	0.770995
ENSG00000173080	10.9627	-0.538928	0.874796	-0.616061	0.537854	0.730492
ENSG00000116584	12133.2	-1.00628	0.166252	-6.0527	1.42434e-09	2.87319e-08
ENSG00000273002	55.4557	-0.777685	0.418851	-1.85671	0.0633523	0.168201
ENSG00000163479	4081.5	-0.398619	0.21649	-1.84128	0.0655801	0.172772
ENSG00000160803	2215.62	-0.190372	0.201043	-0.946923	0.343678	0.56083
ENSG00000116586	2377.26	0.346018	0.188129	1.83926	0.0658772	0.173417
ENSG00000254726	58.0909	0.969393	0.485782	1.99553	0.0459849	0.13145
ENSG00000160789	16281.6	0.378616	0.370591	1.02165	0.306946	0.520354
ENSG00000196189	2308.77	-1.00341	0.514368	-1.95077	0.0510842	0.142665
ENSG00000160785	2344.61	-0.402816	0.250167	-1.61019	0.107357	0.250223
ENSG00000160783	317.942	-0.0266738	0.304759	-0.087524	0.930255	0.97125
ENSG00000160781	72.9601	-0.659459	0.445596	-1.47995	0.138887	0.302478
ENSG00000198952	6992.45	-0.371883	0.328718	-1.13131	0.257923	0.4627
ENSG00000163472	204.188	-0.119154	0.24375	-0.488839	0.624955	0.795307
ENSG00000198715	3158.39	0.263446	0.302708	0.870298	0.384138	0.60177
ENSG00000163468	7956.82	0.17713	0.199076	0.889761	0.373594	0.590955
ENSG00000163467	22.5555	0.454618	0.590825	0.769463	0.441618	0.6544
ENSG00000125462	24.4038	-3.86053	0.883478	-4.36969	1.24421e-05	0.000113999
ENSG00000116604	3293.19	-0.0707225	0.170737	-0.414218	0.678714	0.831662
ENSG00000183856	1509.81	2.99253	0.241402	12.3965	2.73126e-35	8.32363e-33
ENSG00000163382	1412.33	1.13953	0.310531	3.6696	0.000242927	0.0015998
ENSG00000160818	844.749	1.32233	0.203133	6.50966	7.53215e-11	1.87678e-09
ENSG00000132692	28.2033	0.316234	0.528164	0.598742	0.549345	0.739365
ENSG00000272405	60.453	0.766725	0.569537	1.34623	0.17823	0.362118
ENSG00000229953	4.2585	0.0254509	1.2519	0.0203298	0.98378	0.994734
ENSG00000132688	724.174	0.732757	0.707411	1.03583	0.300282	0.512629
ENSG00000143320	1012.42	0.593291	1.27595	0.46498	0.641946	0.806361
ENSG00000143319	1360.9	0.23814	0.186578	1.27636	0.20183	0.393044
ENSG00000143303	589.67	-0.31543	0.285327	-1.1055	0.268942	0.476687
ENSG00000143314	1043.13	1.42461	0.256527	5.55344	2.80108e-08	4.44961e-07
ENSG00000143321	8624.38	-0.960863	0.239513	-4.01174	6.02716e-05	0.000468917
ENSG00000143294	1848.81	-0.474035	0.203734	-2.32674	0.0199793	0.0676646
ENSG00000027869	247.313	-1.12482	0.396916	-2.8339	0.00459843	0.0199803
ENSG00000198400	21.9226	-0.0142484	1.37328	-0.0103754	0.991722	0.997969
ENSG00000027644	4.83243	-1.82192	1.90884	-0.954466	0.339848	0.556757
ENSG00000187800	14.7076	1.44202	1.48966	0.968022	0.333034	0.550076
ENSG00000132694	4633.09	-0.758561	0.0945718	-8.02101	1.0488e-15	5.23317e-14
ENSG00000237842	8.87703	0.817932	0.795355	1.02839	0.303768	0.516422
ENSG00000253831	78.3744	-5.17582	0.791938	-6.53563	6.33404e-11	1.60039e-09
ENSG00000117036	3040.28	-1.39573	0.216398	-6.4498	1.11998e-10	2.70557e-09
ENSG00000235700	5.36449	-0.526608	0.868419	-0.606398	0.54425	0.735306
ENSG00000183853	309.552	3.18175	0.700481	4.54224	5.56591e-06	5.51827e-05
ENSG00000227295	16.9494	-2.01343	0.728123	-2.76524	0.00568808	0.0238415
ENSG00000158473	619.968	2.26528	0.286855	7.89697	2.85774e-15	1.37068e-13
ENSG00000229914	75.3623	2.2902	0.951616	2.40664	0.0161001	0.0568192
ENSG00000176320	117.474	1.62465	0.903082	1.79901	0.0720175	0.185835
ENSG00000158477	706.118	1.03075	0.627132	1.6436	0.100259	0.238134
ENSG00000158481	1703.46	1.56121	0.333099	4.68693	2.77338e-06	2.95365e-05
ENSG00000158485	541.553	1.14473	0.703209	1.62787	0.103552	0.244082
ENSG00000158488	1743.33	1.21286	0.499221	2.42951	0.0151191	0.0539823
ENSG00000231434	9.20964	0.136154	0.909017	0.149782	0.880936	0.945246
ENSG00000163554	15.3908	0.245524	0.749175	0.327725	0.743119	0.870672
ENSG00000163563	898.8	0.0156425	0.346366	0.0451619	0.963978	0.985966
ENSG00000163564	10.6674	0.163625	0.936843	0.174656	0.86135	0.935802
ENSG00000163565	5078.23	-0.224111	0.399669	-0.560741	0.574974	0.757442
ENSG00000163568	4.76657	-2.38545	1.97241	-1.20941	0.226506	0.424429
ENSG00000162706	4.9075	-0.0446936	1.71354	-0.0260825	0.979192	0.992502
ENSG00000213088	6.38016	-5.33423	1.64176	-3.24909	0.00115773	0.00620633
ENSG00000179639	282.459	4.60287	1.0304	4.46705	7.93044e-06	7.58542e-05
ENSG00000158716	1150.76	1.51754	0.337147	4.50114	6.75914e-06	6.55048e-05
ENSG00000181036	255.806	-2.02175	0.508455	-3.97626	7.00072e-05	0.00053502
ENSG00000158714	8508.29	-1.29536	0.27172	-4.76725	1.86762e-06	2.05989e-05
ENSG00000188004	73.9142	-0.887449	0.445095	-1.99384	0.0461691	0.131876
ENSG00000213085	13.0249	-0.41233	1.09108	-0.377912	0.705496	0.850159
ENSG00000158710	8334.25	-0.425463	0.232905	-1.82677	0.0677347	0.177396
ENSG00000162723	16.8396	-2.31183	1.00638	-2.29717	0.0216091	0.0721724
ENSG00000177807	36.7836	-3.93613	0.747939	-5.26264	1.42004e-07	1.96436e-06
ENSG00000260766	36.9547	0.368755	0.354757	1.03946	0.298592	0.510778
ENSG00000143315	421.96	-0.00257431	0.152039	-0.0169318	0.986491	0.995935
ENSG00000162729	646.682	-1.47443	0.231609	-6.36604	1.93976e-10	4.52054e-09
ENSG00000227741	27.6194	-1.44125	0.663695	-2.17155	0.0298894	0.0938765
ENSG00000162734	17497.8	-0.47295	0.267023	-1.77119	0.0765287	0.194478
ENSG00000132716	1451.7	-0.0808689	0.106722	-0.757756	0.448597	0.659609
ENSG00000228606	10.5766	-0.597746	0.838715	-0.712693	0.476035	0.682378
ENSG00000224261	4.50324	2.76885	1.36472	2.02887	0.0424715	0.123608
ENSG00000162735	1439.84	-0.191206	0.232198	-0.823463	0.410245	0.625889
ENSG00000122218	10791.3	-0.155604	0.220263	-0.706444	0.479912	0.685807
ENSG00000235082	33.1115	-0.234537	0.4286	-0.547216	0.58423	0.764559
ENSG00000162736	7465.49	-0.512673	0.160944	-3.1854	0.00144552	0.00749783
ENSG00000171786	11.9226	-1.24977	1.1706	-1.06763	0.285686	0.495765
ENSG00000162738	23.6588	-0.0170905	1.44835	-0.0117999	0.990585	0.997484
ENSG00000162739	83.3315	-0.374752	0.610973	-0.61337	0.539632	0.732112
ENSG00000234425	4.38095	3.20347	1.45943	2.19501	0.0281628	0.0896045
ENSG00000066294	15976.3	0.549844	0.330527	1.66354	0.0962045	0.230744
ENSG00000117090	1415.92	-7.79181	0.623584	-12.4952	7.93006e-36	2.49344e-33
ENSG00000228863	35.4641	-4.7902	0.782812	-6.11922	9.40333e-10	1.96903e-08
ENSG00000117091	1506.66	-3.3449	0.364504	-9.17657	4.45022e-20	3.57121e-18
ENSG00000026751	15048.3	-4.47877	0.45888	-9.76022	1.66791e-22	1.70307e-20
ENSG00000122224	20.7446	1.17732	0.566596	2.07789	0.0377194	0.112782
ENSG00000122223	218.301	0.619555	0.687448	0.901238	0.367462	0.58485
ENSG00000213080	32.641	-0.461137	0.39494	-1.16761	0.242963	0.444093
ENSG00000158769	1808.59	-0.415279	0.278742	-1.48983	0.136268	0.298335
ENSG00000215845	37.7147	-0.0859795	0.48802	-0.17618	0.860152	0.934952
ENSG00000158773	3024.31	-0.0487469	0.25046	-0.19463	0.845683	0.926984
ENSG00000186517	15815.6	-0.218	0.203445	-1.07154	0.283925	0.4934
ENSG00000143217	500.654	-0.514102	0.400629	-1.28324	0.199409	0.390017
ENSG00000228917	4.38207	-1.40963	1.69153	-0.833347	0.404649	0.620746
ENSG00000162755	5.19946	-1.27894	1.57728	-0.81085	0.417452	0.632984
ENSG00000143256	1246.47	0.302803	0.218657	1.38484	0.166103	0.344884
ENSG00000158793	912.958	-0.450831	0.136884	-3.29353	0.000989364	0.00542889
ENSG00000158796	691.763	-0.516273	0.186346	-2.77051	0.00559685	0.0235139
ENSG00000143222	1668.38	-0.346538	0.201883	-1.71653	0.0860647	0.212126
ENSG00000143258	552.67	0.0952511	0.298254	0.319362	0.749452	0.87433
ENSG00000143224	243.692	0.260078	0.187953	1.38374	0.166438	0.345443
ENSG00000158850	850.171	-0.296065	0.180126	-1.64365	0.100248	0.238134
ENSG00000158859	18.8294	2.1545	0.659719	3.26578	0.00109162	0.0059001
ENSG00000158864	4813.29	0.0168752	0.205244	0.0822204	0.934471	0.972844
ENSG00000158869	21497.2	-1.13306	0.208136	-5.44383	5.2148e-08	7.80211e-07
ENSG00000158874	21.7113	-1.4889	0.831012	-1.79167	0.0731858	0.188106
ENSG00000158882	699.616	1.08037	0.2632	4.10475	4.0476e-05	0.000329683
ENSG00000143257	23.7866	-0.364992	0.509016	-0.717054	0.473341	0.680337
ENSG00000158887	104.975	0.0561698	0.294912	0.190463	0.848947	0.929001
ENSG00000143252	4437.15	0.241568	0.219729	1.09939	0.271597	0.479998
ENSG00000283696	24.2726	-0.102677	0.546251	-0.187967	0.850902	0.930001
ENSG00000215840	3.56463	-0.587434	1.38255	-0.424891	0.670916	0.826626
ENSG00000143226	34320.1	0.105242	0.292574	0.359712	0.719062	0.857963
ENSG00000273112	44.9827	-0.354309	0.72192	-0.490787	0.623577	0.794369
ENSG00000173110	3296.25	-0.534529	0.346791	-1.54136	0.12323	0.277236
ENSG00000203747	17552.1	-0.933269	0.401463	-2.32467	0.0200897	0.0679919
ENSG00000244682	2101.11	-1.0699	0.32558	-3.28615	0.00101568	0.00554706
ENSG00000225217	2320.37	-1.29753	0.309695	-4.18969	2.7933e-05	0.000236666
ENSG00000162747	212.809	-1.40209	0.437672	-3.20352	0.0013576	0.00710696
ENSG00000072694	2908.79	-1.63515	0.47672	-3.43001	0.00060357	0.00355308
ENSG00000234211	11.0852	-2.58649	0.926439	-2.79186	0.00524057	0.0222245
ENSG00000213075	7.15823	-2.92365	1.31476	-2.22372	0.0261676	0.0843127
ENSG00000132185	109.703	-1.88488	0.526464	-3.58027	0.000343237	0.00216465
ENSG00000162746	278.218	-1.27981	0.322451	-3.96902	7.21696e-05	0.000549427
ENSG00000081721	475.4	0.0802049	0.183082	0.438081	0.661328	0.819839
ENSG00000118217	4766.84	-0.239076	0.099668	-2.39873	0.0164522	0.0577366
ENSG00000229808	5.22431	-2.29047	1.11804	-2.04865	0.0404966	0.119109
ENSG00000162745	8791.3	-1.43855	0.292974	-4.91017	9.09956e-07	1.0723e-05
ENSG00000198929	34.1079	0.140912	1.03625	0.135982	0.891835	0.950807
ENSG00000227094	6.34521	1.53095	1.75751	0.87109	0.383705	0.601377
ENSG00000239887	70.8277	-0.490902	0.827637	-0.593137	0.553089	0.742085
ENSG00000171722	4.38707	-0.302266	1.99337	-0.151636	0.879474	0.944348
ENSG00000152332	6241.71	0.191963	0.272185	0.705265	0.480645	0.686552
ENSG00000117143	413.732	0.229172	0.26658	0.859674	0.389969	0.607924
ENSG00000162733	44.5443	2.58899	1.19466	2.16714	0.0302242	0.0947029
ENSG00000132196	309.263	-0.410627	0.235556	-1.74323	0.081294	0.203559
ENSG00000117152	30.1365	3.32407	2.15776	1.54052	0.123433	0.277566
ENSG00000143248	21.7349	-0.0372667	0.644069	-0.0578613	0.953859	0.981252
ENSG00000232995	13.7081	-0.226654	0.692235	-0.327424	0.743347	0.870836
ENSG00000143228	90.3539	2.3639	0.826565	2.85991	0.00423756	0.0186413
ENSG00000213070	7.6521	-0.045852	1.18784	-0.0386012	0.969208	0.988451
ENSG00000185630	138.967	-2.01107	0.474308	-4.24001	2.23507e-05	0.000193846
ENSG00000143198	2653.66	0.429685	0.184814	2.32496	0.0200741	0.0679508
ENSG00000143149	2115.98	-0.0730315	0.180448	-0.404723	0.685681	0.836106
ENSG00000143183	2499.85	-0.139167	0.116896	-1.19052	0.233843	0.433219
ENSG00000224358	6.25244	0.00179978	1.18861	0.00151419	0.998792	0.999498
ENSG00000143179	589.569	1.10573	0.234689	4.71147	2.45931e-06	2.65196e-05
ENSG00000236364	6.22043	0.261407	0.944561	0.27675	0.781972	0.894347
ENSG00000215835	22.0962	0.800323	0.518188	1.54446	0.122476	0.276011
ENSG00000143157	3048.85	0.237417	0.105632	2.24759	0.0246026	0.0803417
ENSG00000152382	234.398	0.248576	0.204023	1.21837	0.223082	0.4201
ENSG00000143195	5.50875	5.75366	2.12447	2.70828	0.00676339	0.0275557
ENSG00000143167	25.5668	6.42433	1.3758	4.66953	3.01883e-06	3.19301e-05
ENSG00000198842	88.6508	7.87641	1.0307	7.64182	2.14178e-14	8.80218e-13
ENSG00000143190	1488.57	-0.626835	0.220462	-2.84328	0.0044652	0.0194783
ENSG00000272033	6.85146	-1.05375	1.48397	-0.710084	0.477652	0.683776
ENSG00000143162	16318.8	-0.363288	0.178356	-2.03687	0.041663	0.121618
ENSG00000241666	17.0667	-0.00177941	0.602486	-0.00295344	0.997643	0.99885
ENSG00000198771	3730.7	0.633149	0.22293	2.84012	0.00450959	0.0196417
ENSG00000197965	3131.15	-0.0695982	0.199549	-0.348777	0.727257	0.862792
ENSG00000143199	36.1791	0.449635	1.02673	0.437931	0.661437	0.819839
ENSG00000143158	739.878	0.168037	0.24649	0.681721	0.495416	0.697571
ENSG00000143164	1483.11	-0.161044	0.12236	-1.31614	0.188126	0.375134
ENSG00000143147	64.1312	-0.290499	0.63538	-0.457205	0.647524	0.810029
ENSG00000143155	1123.65	-0.0385248	0.188876	-0.203969	0.838378	0.923456
ENSG00000213064	4016.32	0.128923	0.18812	0.68532	0.493142	0.696004
ENSG00000143178	87.7012	-0.75397	0.352513	-2.13885	0.0324481	0.100166
ENSG00000203601	4.91998	2.47767	1.4405	1.72001	0.0854306	0.211115
ENSG00000143153	9076.72	1.28983	0.413538	3.11901	0.00181457	0.00908436
ENSG00000143156	91.8775	-0.00836865	0.398655	-0.0209922	0.983252	0.994471
ENSG00000117475	704.494	-0.878961	0.545479	-1.61136	0.107102	0.250004
ENSG00000117477	4.52841	-1.36519	1.79404	-0.760962	0.44668	0.658535
ENSG00000117479	163.117	0.803987	0.305851	2.62869	0.00857148	0.0336489
ENSG00000198734	154.925	-0.830991	2.29102	-0.362716	0.716817	0.856626
ENSG00000174175	4.32969	-0.335891	2.3888	-0.140611	0.888177	0.94851
ENSG00000000460	226.459	0.649892	0.283906	2.28911	0.0220728	0.0734118
ENSG00000188404	49.6715	0.00834925	0.729089	0.0114516	0.990863	0.997612
ENSG00000171806	55.0467	0.691185	0.626717	1.10287	0.270085	0.478073
ENSG00000000457	403.833	-0.653635	0.196627	-3.32425	0.000886573	0.00495266
ENSG00000239494	5.68782	-1.92073	1.71227	-1.12174	0.261971	0.467638
ENSG00000075945	553.929	-0.865271	0.244433	-3.53991	0.000400262	0.00247929
ENSG00000231407	10.3115	-1.5454	1.15432	-1.33879	0.180639	0.365354
ENSG00000120370	373.664	-0.546733	0.330773	-1.6529	0.0983522	0.234882
ENSG00000116132	9.01914	-3.84813	1.68572	-2.28278	0.0224431	0.0743685
ENSG00000076258	219.701	-0.491989	0.287184	-1.71315	0.0866856	0.213205
ENSG00000117523	11490.4	-0.195609	0.160067	-1.22204	0.221692	0.418493
ENSG00000233328	109.352	-0.264219	0.422972	-0.624672	0.532186	0.725988
ENSG00000117533	522.251	-0.628352	0.379077	-1.65758	0.0974017	0.233079
ENSG00000010165	1648.25	0.0701427	0.230307	0.304561	0.7607	0.880994
ENSG00000197959	41.8937	0.261316	0.643102	0.406337	0.684495	0.835628
ENSG00000135845	749.719	-0.565965	0.16593	-3.41086	0.000647589	0.0037763
ENSG00000094975	784.518	-0.560962	0.498388	-1.12555	0.260355	0.465719
ENSG00000120337	8.66751	2.25398	2.46616	0.913967	NA	NA
ENSG00000117586	31.9401	-0.325118	0.624292	-0.520778	0.602522	0.778923
ENSG00000203739	33.0682	-0.635636	0.486202	-1.30735	0.191094	0.379068
ENSG00000117592	4090.64	0.315905	0.19528	1.6177	0.105727	0.247852
ENSG00000076321	602.935	-0.000332195	0.184871	-0.0017969	0.998566	0.999373
ENSG00000120334	213.521	-0.146245	0.266663	-0.548427	0.583399	0.764018
ENSG00000117593	873.45	0.234011	0.192016	1.2187	0.222957	0.419984
ENSG00000270084	15.8425	-0.347722	0.67384	-0.516031	0.605833	0.781159
ENSG00000234741	1068.87	1.1404	0.241681	4.71862	2.37449e-06	2.56888e-05
ENSG00000185278	1053.75	0.330391	0.416321	0.793595	0.427431	0.642168
ENSG00000135870	1880.85	-0.110331	0.330811	-0.333518	0.738743	0.868353
ENSG00000236535	4.22604	0.732522	1.72645	0.424294	0.671351	0.826988
ENSG00000152061	893.237	-0.241955	0.330522	-0.73204	0.464144	0.673323
ENSG00000116161	2410.05	0.52019	0.151617	3.43094	0.000601498	0.00354193
ENSG00000120333	436.919	0.362279	0.219418	1.65109	0.0987208	0.235496
ENSG00000235750	708.891	-0.976934	0.698247	-1.39912	0.161776	0.338505
ENSG00000116147	8.51978	-0.341663	1.3258	-0.257704	0.796635	0.901128
ENSG00000227740	10.5217	-0.135352	1.17052	-0.115634	0.907942	0.960504
ENSG00000230777	10.2727	0.293006	0.917977	0.319187	0.749585	0.874408
ENSG00000143207	1904.42	-0.313517	0.127983	-2.44968	0.0142984	0.0515676
ENSG00000236021	5.69576	-2.30318	1.24343	-1.85227	0.0639867	0.169476
ENSG00000198797	4.31271	4.89326	2.19652	2.22774	0.0258981	0.0835801
ENSG00000224968	66.1138	4.47428	0.508546	8.79818	1.39047e-18	9.53071e-17
ENSG00000242193	237.032	1.50406	0.285357	5.27081	1.35824e-07	1.88413e-06
ENSG00000224687	80.2712	-0.0805571	0.445403	-0.180864	0.856475	0.933523
ENSG00000075391	2794.51	0.0336456	0.370448	0.0908242	0.927632	0.970131
ENSG00000213058	22.9128	0.530477	0.704412	0.753078	0.451403	0.66177
ENSG00000213057	10.1783	-1.16495	1.16629	-0.998849	0.317868	0.532756
ENSG00000116191	182.458	-0.816426	0.367104	-2.22396	0.026151	0.0842729
ENSG00000116199	1472.03	0.0455061	0.137884	0.330033	0.741375	0.869657
ENSG00000186283	1070	1.02193	0.19995	5.11092	3.20594e-07	4.1662e-06
ENSG00000143322	4089	-1.25566	0.243879	-5.14869	2.62309e-07	3.45486e-06
ENSG00000057252	2990.8	-0.584982	0.193887	-3.01713	0.00255177	0.0121209
ENSG00000162779	7.32241	-1.27538	2.07463	-0.61475	0.53872	0.731226
ENSG00000169905	3160.88	-0.19369	0.144908	-1.33664	0.181339	0.36647
ENSG00000272906	4.3212	-2.17917	1.35297	-1.61065	0.107256	0.250169
ENSG00000143337	3207.08	-0.233151	0.137227	-1.69902	0.0893152	0.218398
ENSG00000260360	9.54598	0.014478	0.96836	0.014951	0.988071	0.996504
ENSG00000135837	2573.23	-0.115128	0.499196	-0.230626	0.817605	0.913116
ENSG00000223450	4.37307	-0.83236	1.76883	-0.470571	0.637947	0.803553
ENSG00000116260	22864.1	-0.861693	0.26706	-3.22659	0.00125274	0.00664048
ENSG00000121454	80.6606	0.825341	0.418877	1.97036	0.0487967	0.137675
ENSG00000230124	708.17	0.742769	0.219282	3.38728	0.000705898	0.00406841
ENSG00000143324	2214.7	-0.0902486	0.261702	-0.344852	0.730205	0.863841
ENSG00000135835	147.666	0.267463	0.194277	1.37671	0.168602	0.348845
ENSG00000243155	25.7742	0.766792	0.571408	1.34194	0.179617	0.363771
ENSG00000232586	9.4074	-0.931641	0.9041	-1.03046	0.302793	0.515257
ENSG00000251520	13.5228	0.256506	0.721568	0.355484	0.722227	0.860288
ENSG00000270711	8.14301	-0.339185	0.994503	-0.341059	0.733059	0.865385
ENSG00000135823	2867.55	0.0560953	0.225221	0.249068	0.803308	0.904081
ENSG00000153029	1388.91	-1.04057	0.341193	-3.04979	0.00228998	0.0110459
ENSG00000162783	4193.22	-2.11577	0.253605	-8.34278	7.25614e-17	4.1784e-15
ENSG00000198216	6.86974	0.903773	1.93038	0.468184	0.639653	0.804654
ENSG00000135821	56961.4	-1.82546	0.356635	-5.11856	3.0788e-07	4.00716e-06
ENSG00000135828	963.381	-0.166177	0.152374	-1.09058	0.275456	0.483733
ENSG00000143333	554.733	-2.62333	0.605579	-4.33194	1.47802e-05	0.000133139
ENSG00000261504	5.46075	-3.05441	1.97263	-1.54839	0.121528	0.274342
ENSG00000135824	18.6775	4.01848	0.857031	4.68883	2.74766e-06	2.92941e-05
ENSG00000135838	10276	0.181669	0.186653	0.973299	0.330405	0.54692
ENSG00000135829	5590	0.579602	0.137624	4.2115	2.53679e-05	0.000216241
ENSG00000135862	4547.09	-0.617778	0.210786	-2.93084	0.00338048	0.0153764
ENSG00000224468	10.2982	-2.25812	1.01817	-2.21782	0.0265673	0.0854199
ENSG00000058085	58.0679	-2.51092	1.59961	-1.5697	0.116484	0.265619
ENSG00000157064	40.2874	-0.0193662	0.60578	-0.0319691	0.974497	0.990752
ENSG00000232860	14.4537	-0.142743	0.438144	-0.325789	0.744584	0.871614
ENSG00000116698	3030.06	-0.0294782	0.193048	-0.152699	0.878636	0.944268
ENSG00000116701	14206.2	-0.596832	0.279531	-2.13512	0.0327508	0.100896
ENSG00000162704	16908.6	-0.4259	0.201196	-2.11684	0.0342737	0.104483
ENSG00000143344	15831.3	-0.574132	0.264695	-2.16903	0.0300804	0.0943268
ENSG00000173627	4.88011	-2.46644	1.94957	-1.26512	0.205829	0.39797
ENSG00000198756	573.108	1.12346	0.317324	3.54042	0.00039949	0.00247606
ENSG00000198860	666.036	0.838907	0.200419	4.18576	2.84208e-05	0.000240387
ENSG00000116667	1014.35	-3.26157	0.509265	-6.40446	1.50905e-10	3.57997e-09
ENSG00000116406	3498.94	-0.348461	0.437858	-0.795831	0.42613	0.641089
ENSG00000135842	6492.15	-2.37999	0.40918	-5.81648	6.00982e-09	1.095e-07
ENSG00000121481	575.385	-0.0600971	0.28161	-0.213405	0.831011	0.919842
ENSG00000121486	1044.41	-0.308021	0.259734	-1.18591	0.235659	0.435179
ENSG00000116668	207.192	-0.767702	0.446633	-1.71886	0.085639	0.211419
ENSG00000231084	13.0991	-0.16739	0.996267	-0.168017	0.86657	0.938598
ENSG00000279838	56.1811	-0.023539	0.617473	-0.0381215	0.969591	0.988481
ENSG00000116679	11883.7	0.345161	0.263502	1.3099	0.19023	0.377787
ENSG00000273004	5.23841	-1.18423	1.23115	-0.961889	0.336105	0.553442
ENSG00000143341	21.5625	2.42707	1.7373	1.39703	0.162404	0.339388
ENSG00000047410	2763.35	0.248695	0.529126	0.470012	0.638347	0.803738
ENSG00000157181	534.022	0.233998	0.460854	0.507749	0.611629	0.785666
ENSG00000262180	10.5619	0.387065	0.677364	0.571428	0.56771	0.752024
ENSG00000229739	8.99117	-1.24799	1.4467	-0.862646	0.388332	0.606279
ENSG00000116703	4.68432	0.277337	1.20938	0.229322	0.818619	0.913784
ENSG00000073756	5519.88	-6.03284	0.420656	-14.3415	1.20401e-46	7.4532e-44
ENSG00000116711	1039.85	-0.374147	0.393144	-0.951679	0.34126	0.558448
ENSG00000150681	511.532	1.84548	0.629877	2.9299	0.00339068	0.0154157
ENSG00000226723	4.38283	0.763203	1.53164	0.498292	0.618279	0.790358
ENSG00000090104	755.002	-0.334524	0.666743	-0.501728	0.615859	0.7889
ENSG00000231767	5.42373	0.571266	1.08244	0.527758	0.597668	0.775527
ENSG00000116741	289.043	0.157623	0.539161	0.292349	0.77002	0.886564
ENSG00000116750	837.628	0.934395	0.35126	2.66012	0.00781118	0.0311331
ENSG00000116747	1084.14	0.238183	0.428459	0.555906	0.578275	0.760123
ENSG00000272579	45.395	0.698144	0.529646	1.31813	0.187459	0.374333
ENSG00000023572	331.436	0.163305	0.234005	0.697872	0.485257	0.689339
ENSG00000134371	1613.2	-0.144306	0.300719	-0.479869	0.631321	0.799401
ENSG00000162630	5.13346	-2.18201	1.87128	-1.16605	0.243595	0.444652
ENSG00000000971	783.875	0.00679666	0.444276	0.0152983	0.987794	0.996504
ENSG00000066279	239.074	3.70285	1.05117	3.52259	0.000427359	0.00262208
ENSG00000177888	410.059	-0.223713	0.607023	-0.368541	0.71247	0.854109
ENSG00000213047	586.441	0.168676	0.51218	0.329328	0.741907	0.869921
ENSG00000203724	45.6497	0.0118353	0.532989	0.0222055	0.982284	0.993772
ENSG00000151414	1914.41	-0.153094	0.518654	-0.295176	0.76786	0.885105
ENSG00000081237	11546	-0.773578	0.54963	-1.40745	0.159293	0.334736
ENSG00000261573	4.48616	-2.22279	1.17374	-1.89377	0.0582558	0.158197
ENSG00000236278	4.7055	-1.56263	1.37172	-1.13917	0.254631	0.458295
ENSG00000229989	8.87341	-1.2602	0.957935	-1.31554	0.188328	0.37525
ENSG00000203721	9.11155	-1.21116	0.869818	-1.39243	0.163792	0.341389
ENSG00000162702	1290.61	-0.938418	0.178321	-5.26251	1.42103e-07	1.96436e-06
ENSG00000118193	165.845	1.0442	0.817242	1.27771	0.201353	0.392462
ENSG00000118197	749.913	-1.31292	0.152227	-8.62474	6.42393e-18	4.0526e-16
ENSG00000118200	1973.86	-0.503622	0.380603	-1.32322	0.185762	0.372264
ENSG00000163362	247.148	1.62015	0.491245	3.29806	0.000973566	0.00535854
ENSG00000116852	2823.77	0.744962	0.257513	2.89291	0.00381686	0.0170327
ENSG00000229191	38.6638	1.78494	0.897453	1.9889	0.0467122	0.133159
ENSG00000116857	798.235	-0.216628	0.304567	-0.711264	0.47692	0.683185
ENSG00000163395	86.9933	-0.758659	2.00649	-0.378104	0.705354	0.850068
ENSG00000118194	12.2005	-1.66404	1.26035	-1.3203	0.186734	0.373525
ENSG00000159166	501.181	-6.38052	1.20775	-5.28297	1.27105e-07	1.77687e-06
ENSG00000282221	10.7033	-7.56532	1.30425	-5.80051	6.6113e-09	1.19492e-07
ENSG00000159173	7.20985	-2.30393	1.28998	-1.78602	0.0740957	0.189707
ENSG00000174307	1180.88	-0.524905	0.446857	-1.17466	0.24013	0.440562
ENSG00000159176	6712.15	-0.0359967	0.215046	-0.167391	0.867062	0.938662
ENSG00000224536	52.2853	-0.413264	0.348299	-1.18652	0.235416	0.434852
ENSG00000223396	79.6394	0.00437319	0.31467	0.0138977	0.988912	0.996761
ENSG00000134369	1834.54	-1.14605	0.251885	-4.5499	5.36722e-06	5.34536e-05
ENSG00000235121	4.85953	-0.592794	1.82481	-0.324852	0.745293	0.87193
ENSG00000198700	2472.76	0.0367535	0.168864	0.217651	0.827701	0.918282
ENSG00000198892	133.122	-0.4609	0.342866	-1.34426	0.178865	0.362878
ENSG00000163431	5.12043	2.54601	2.73537	0.930773	NA	NA
ENSG00000134375	1961.07	0.427836	0.183523	2.33124	0.0197409	0.0669718
ENSG00000176393	4952.96	0.0168315	0.272348	0.0618015	0.950721	0.980057
ENSG00000273478	35.0866	-0.375458	0.411282	-0.912896	0.361297	0.579097
ENSG00000234678	24.3209	-0.261063	0.49093	-0.531772	0.594884	0.773588
ENSG00000163435	5.3558	-1.7384	1.20489	-1.44279	0.149079	0.31891
ENSG00000170075	19.2406	-0.149328	1.17338	-0.127263	0.898732	0.955272
ENSG00000143862	2586.41	-0.90065	0.171297	-5.25783	1.45763e-07	2.01074e-06
ENSG00000143851	2467.33	0.402606	0.454965	0.884915	0.376202	0.59399
ENSG00000243323	5.95862	0.553566	1.21762	0.45463	0.649376	0.810728
ENSG00000077152	124.534	0.478498	0.369303	1.29568	0.195087	0.384038
ENSG00000077157	608.47	0.194598	0.219793	0.885367	0.375959	0.593841
ENSG00000236439	8.34005	0.884035	0.836978	1.05622	0.290867	0.501937
ENSG00000143858	15.945	0.831592	0.988245	0.841484	0.400077	0.616933
ENSG00000117139	1443.66	-0.720858	0.111046	-6.49156	8.49549e-11	2.10096e-09
ENSG00000235449	7.04211	0.349118	0.828179	0.421549	0.673354	0.828389
ENSG00000234996	4.76459	-0.748118	1.175	-0.636697	0.524322	0.719323
ENSG00000183155	741.345	-0.611842	0.187211	-3.26819	0.00108238	0.00585175
ENSG00000117153	2047.61	-0.2953	0.183256	-1.6114	0.107092	0.250004
ENSG00000230280	38.6162	-0.21471	0.643852	-0.333477	0.738774	0.868353
ENSG00000199471	5.91388	-1.07309	1.56747	-0.684605	0.493593	0.69631
ENSG00000159346	6196.43	-0.580421	0.179592	-3.23188	0.00122978	0.00653629
ENSG00000159348	2132.11	-0.14454	0.195453	-0.739514	0.459595	0.669239
ENSG00000163444	1755.91	0.23368	0.195619	1.19457	0.232257	0.431754
ENSG00000143847	183.764	-0.286543	0.680928	-0.420812	0.673892	0.828573
ENSG00000163485	243.054	3.33668	1.05391	3.16599	0.00154554	0.00793561
ENSG00000133055	255.95	0.462193	0.413309	1.11828	0.263449	0.469469
ENSG00000133048	35102.1	-1.5875	0.852102	-1.86304	0.0624569	0.16633
ENSG00000133063	10464.2	-0.586015	0.770049	-0.76101	0.446651	0.658535
ENSG00000231507	24.6943	-0.905907	0.834359	-1.08575	0.277589	0.486409
ENSG00000233791	10.9002	-2.52974	1.36111	-1.85858	0.0630862	0.167715
ENSG00000159388	10947.4	-1.78932	0.214635	-8.33655	7.64871e-17	4.39169e-15
ENSG00000058668	2386.38	-0.0425624	0.416618	-0.102162	0.918628	0.966133
ENSG00000122188	3.89339	0.557446	2.08052	0.267935	0.788749	0.897486
ENSG00000058673	4.95384	-0.517896	1.50158	-0.344901	0.730169	0.863841
ENSG00000257315	31.1643	-0.24064	0.624524	-0.385318	0.700002	0.846592
ENSG00000182004	452.091	0.763323	0.222972	3.42341	0.000618412	0.00362859
ENSG00000143842	138.86	0.0685002	0.754602	0.0907765	0.92767	0.970131
ENSG00000143845	13.9907	-0.5828	1.27986	-0.455363	0.648848	0.810406
ENSG00000143850	10.5984	0.221228	0.997644	0.221751	0.824508	0.916536
ENSG00000226330	10.8109	5.17284	1.15422	4.48168	7.40586e-06	7.12495e-05
ENSG00000158615	3479.01	-0.617554	0.131641	-4.69118	2.71633e-06	2.89756e-05
ENSG00000133056	3968.02	4.98475	0.399029	12.4922	8.23477e-36	2.54879e-33
ENSG00000198625	2133.98	0.00089109	0.186276	0.0047837	0.996183	0.998502
ENSG00000240710	10.9626	-1.90574	1.06294	-1.7929	0.0729896	0.187724
ENSG00000170382	57.2146	0.365771	0.692137	0.528466	0.597176	0.775381
ENSG00000240219	14.5736	-0.170991	1.16094	-0.147286	0.882906	0.946094
ENSG00000163531	6.27275	0.797902	1.84937	0.431445	NA	NA
ENSG00000174529	37.0794	0.0937381	0.427578	0.219231	0.82647	0.917742
ENSG00000117222	1221.87	-0.221704	0.145911	-1.51944	0.128651	0.286343
ENSG00000271580	8.38795	0.0199071	0.801854	0.0248264	0.980193	0.992874
ENSG00000133059	824.315	-0.375853	0.374238	-1.00431	0.315227	0.530134
ENSG00000133069	120.188	-2.74897	0.864353	-3.18037	0.00147085	0.00760931
ENSG00000163545	163.256	-1.73227	0.319951	-5.41418	6.15719e-08	9.09528e-07
ENSG00000235363	72.7411	0.0526423	0.38756	0.13583	0.891956	0.950807
ENSG00000117266	488.528	-0.808333	0.906922	-0.891293	0.372772	0.589984
ENSG00000174514	8.20539	0.751575	0.979631	0.767202	0.442961	0.655508
ENSG00000158711	1329.42	-0.0841026	0.371619	-0.226314	0.820957	0.914908
ENSG00000236942	4.25517	-1.72207	1.23587	-1.3934	0.163497	0.34099
ENSG00000158715	576.163	0.829088	0.717791	1.15505	0.248068	0.450163
ENSG00000069275	5917.77	0.538745	0.1804	2.9864	0.00282287	0.0132007
ENSG00000117280	3473.21	-0.640804	0.189103	-3.38866	0.000702347	0.00405148
ENSG00000133065	224.393	0.10009	0.369144	0.271142	0.786282	0.896429
ENSG00000174502	15.9548	0.223053	1.09482	0.203735	0.83856	0.923503
ENSG00000276600	2977.38	0.535095	0.4042	1.32384	0.185557	0.372054
ENSG00000196188	3.68439	1.61845	2.04801	0.790256	0.429378	0.643629
ENSG00000263961	113.319	-0.849732	0.883767	-0.961488	0.336307	0.55359
ENSG00000196550	84.1171	-0.513775	0.532496	-0.964843	0.334623	0.551908
ENSG00000266028	4667.32	-0.449916	0.151255	-2.97455	0.00293417	0.0136361
ENSG00000263528	4141.36	-0.95597	0.23854	-4.00758	6.13432e-05	0.000476342
ENSG00000162888	69.4655	-1.03674	0.410086	-2.52811	0.0114677	0.0430073
ENSG00000266094	4888.87	-0.605418	0.21565	-2.80741	0.00499409	0.0213575
ENSG00000143486	825.56	0.724617	0.219359	3.30334	0.000955396	0.00526731
ENSG00000143479	74.2718	-0.876368	0.573519	-1.52805	0.126499	0.282633
ENSG00000162889	6423.37	-0.497348	0.214506	-2.31858	0.0204178	0.0689024
ENSG00000224114	227.125	0.649413	0.395706	1.64115	0.100766	0.239052
ENSG00000284486	8.90989	-2.43835	1.11437	-2.18811	0.0286617	0.0907835
ENSG00000136634	195.83	-1.7709	0.313833	-5.6428	1.67304e-08	2.78967e-07
ENSG00000142224	262.293	-5.93586	1.4507	-4.09173	4.28174e-05	0.000346616
ENSG00000162892	159.342	0.272972	0.303182	0.900355	0.367931	0.585343
ENSG00000162894	1424.7	1.1592	0.267449	4.3343	1.46226e-05	0.000131963
ENSG00000162896	544.151	3.30679	0.648729	5.09734	3.44451e-07	4.44221e-06
ENSG00000162897	107.435	-1.38811	0.729835	-1.90194	0.0571784	0.156055
ENSG00000182795	13.7073	0.698256	0.804146	0.86832	0.385219	0.602607
ENSG00000123836	1283.86	1.11751	0.191365	5.83971	5.22922e-09	9.61797e-08
ENSG00000180667	530.409	0.110821	0.462002	0.239872	0.810429	0.90902
ENSG00000196352	1331.81	-2.0369	0.526732	-3.86706	0.000110157	0.000799059
ENSG00000203710	343.561	-1.12493	0.782268	-1.43804	0.150423	0.321147
ENSG00000117335	4724.88	0.0288994	0.219314	0.131772	0.895165	0.952974
ENSG00000203709	141.805	-1.15503	0.438309	-2.6352	0.00840888	0.0331025
ENSG00000076356	2343.97	0.0470921	0.199584	0.235951	0.813471	0.910719
ENSG00000008118	20.472	-1.83983	0.864002	-2.12942	0.0332193	0.102006
ENSG00000196878	1451.28	-1.27802	0.417354	-3.06219	0.00219725	0.0106627
ENSG00000227591	5.70744	-6.65804	2.10046	-3.1698	0.00152546	0.00785901
ENSG00000123689	1202.82	-2.96317	0.406687	-7.28613	3.18994e-13	1.12839e-11
ENSG00000117594	756.38	-6.67388	0.5274	-12.6543	1.05911e-36	3.61723e-34
ENSG00000009790	567.543	1.0956	0.372044	2.94482	0.00323142	0.0147934
ENSG00000162757	145.801	0.342476	0.271648	1.26073	0.207405	0.399892
ENSG00000117595	83.7053	-1.38647	0.492272	-2.81648	0.00485526	0.0208719
ENSG00000117597	461.619	-0.18143	0.246022	-0.737454	0.460846	0.670503
ENSG00000054392	95.6157	0.0242711	0.43877	0.0553163	0.955887	0.981961
ENSG00000234004	7.71027	1.96372	1.09272	1.7971	0.0723194	0.18646
ENSG00000117625	837.366	0.103139	0.250817	0.411213	0.680916	0.833124
ENSG00000082512	54.5572	-0.806022	0.883943	-0.911849	0.361848	0.579361
ENSG00000153363	127.357	-0.803006	0.373869	-2.14783	0.0317276	0.0983557
ENSG00000198570	28.8658	-2.24839	2.15602	-1.04284	0.297021	0.508911
ENSG00000170385	5438.03	-1.47321	0.302401	-4.87171	1.10635e-06	1.28162e-05
ENSG00000117650	46.3367	2.78847	0.846221	3.29521	0.000983498	0.00540569
ENSG00000123684	1783.81	0.420656	0.346407	1.21434	0.224619	0.422048
ENSG00000143493	622.135	0.114313	0.241093	0.474145	0.635397	0.801488
ENSG00000143476	210.632	2.85383	0.509554	5.60064	2.13565e-08	3.48189e-07
ENSG00000220749	46.3657	0.552602	0.494543	1.1174	0.263824	0.469887
ENSG00000066027	1017.27	0.252743	0.166589	1.51716	0.129225	0.287201
ENSG00000229832	5.93437	1.34767	1.36149	0.98985	0.322248	0.537278
ENSG00000065600	824.103	0.172723	0.22927	0.753362	0.451232	0.661716
ENSG00000117691	628.326	0.947399	0.297882	3.18045	0.00147044	0.00760931
ENSG00000260805	17.0089	-1.33785	0.916444	-1.45983	0.144338	0.311188
ENSG00000162772	1696.09	-0.740599	0.586268	-1.26324	0.206501	0.398693
ENSG00000237980	9.8787	0.622002	0.81064	0.767297	0.442905	0.655473
ENSG00000123685	88.539	0.0518612	0.385212	0.13463	0.892904	0.951506
ENSG00000117697	1266.53	0.4697	0.218009	2.1545	0.0312012	0.0971343
ENSG00000203705	878.648	0.120694	0.228894	0.527293	0.59799	0.775677
ENSG00000198468	99.5698	0.884228	0.509029	1.73709	0.082372	0.205401
ENSG00000162769	345.589	0.133572	0.253607	0.526687	0.598411	0.775715
ENSG00000143494	9.21087	-0.382405	1.01583	-0.376446	0.706585	0.850504
ENSG00000174606	819.021	0.0734638	0.199744	0.367789	0.71303	0.854252
ENSG00000136643	760.526	0.011486	0.216003	0.0531752	0.957592	0.982338
ENSG00000117707	103.022	-3.45334	0.782595	-4.41268	1.02098e-05	9.51334e-05
ENSG00000143499	455.927	0.412874	0.205216	2.0119	0.0442304	0.127646
ENSG00000152104	224.865	3.18824	0.686885	4.64158	3.45751e-06	3.61806e-05
ENSG00000117724	449.088	4.0871	0.936974	4.36202	1.28867e-05	0.000117692
ENSG00000250536	5.62476	0.0530301	1.30269	0.0407081	0.967529	0.987722
ENSG00000136636	449.39	0.0432614	0.438102	0.0987475	0.921339	0.967237
ENSG00000042781	4.21903	-1.02021	1.73726	-0.587254	0.557033	0.744543
ENSG00000092978	327.532	-0.137771	0.292875	-0.470409	0.638063	0.803572
ENSG00000067533	290.85	1.50024	0.338195	4.436	9.16451e-06	8.66538e-05
ENSG00000232480	4.73359	5.28189	1.41608	3.72992	0.000191539	0.00130023
ENSG00000092969	43.279	3.18019	0.794409	4.00321	6.2488e-05	0.000483904
ENSG00000143353	460.22	0.213744	0.186299	1.14732	0.25125	0.454167
ENSG00000225920	22.3212	-0.258373	0.848974	-0.304335	0.760873	0.880999
ENSG00000223842	8.01721	0.618992	1.35574	0.45657	0.64798	0.810252
ENSG00000277007	10.2239	1.79573	1.15047	1.56087	0.118554	0.269101
ENSG00000228536	20.6231	-0.490107	1.11426	-0.439851	0.660045	0.818667
ENSG00000215817	22.1921	-0.509862	0.530546	-0.961014	0.336545	0.553844
ENSG00000136628	2997.77	1.05044	0.252528	4.15969	3.18679e-05	0.000266022
ENSG00000162813	824.283	0.0439233	0.175936	0.249655	0.802854	0.903827
ENSG00000067704	3729.87	0.394323	0.139853	2.81956	0.00480902	0.0207001
ENSG00000118873	2027.79	-0.18813	0.276559	-0.680254	0.496344	0.697854
ENSG00000270585	4.53621	0.241607	1.16745	0.206952	0.836047	0.92253
ENSG00000218283	844.899	-0.361705	0.180049	-2.00892	0.0445458	0.128362
ENSG00000162817	34.3137	-1.80351	0.728376	-2.47607	0.0132839	0.04855
ENSG00000117791	14.6296	1.46623	0.975203	1.50351	0.132707	0.292512
ENSG00000186205	7.21658	0.90415	1.2538	0.721127	0.470831	0.678252
ENSG00000136630	2321.69	-2.21091	0.193471	-11.4276	3.04386e-30	5.977e-28
ENSG00000143507	940.44	-1.15176	0.256319	-4.49347	7.00734e-06	6.76454e-05
ENSG00000276997	11.3352	-2.59974	1.07743	-2.41292	0.0158254	0.0560091
ENSG00000143498	97.4761	-0.374213	0.43466	-0.860931	0.389276	0.607417
ENSG00000225265	6.75409	-0.547897	1.37957	-0.39715	0.691257	0.840417
ENSG00000154305	1560.9	-0.310706	0.226979	-1.36888	0.171038	0.352521
ENSG00000272750	12.303	0.268566	0.842761	0.318674	0.749973	0.874513
ENSG00000186063	1423.58	-0.45637	0.292594	-1.55974	0.118822	0.269615
ENSG00000162819	1921.12	-0.057424	0.329015	-0.174533	0.861447	0.935805
ENSG00000197520	80.5079	-1.41871	0.489857	-2.89617	0.00377747	0.0168721
ENSG00000228106	81.3778	0.947973	0.365174	2.59595	0.00943303	0.0364887
ENSG00000154309	240.666	0.362129	0.224849	1.61054	0.107279	0.250169
ENSG00000187554	286.83	1.98811	0.298574	6.65869	2.76285e-11	7.4563e-10
ENSG00000162909	2792.13	0.965018	0.347853	2.77422	0.0055335	0.0232774
ENSG00000143514	1890.54	-0.967989	0.126556	-7.64871	2.03002e-14	8.37765e-13
ENSG00000188460	17.3408	-0.720513	0.615538	-1.17054	0.241784	0.442489
ENSG00000272645	201.974	-1.1546	0.288207	-4.00614	6.17178e-05	0.000478687
ENSG00000185495	128.893	-0.204845	0.437554	-0.468159	0.639671	0.804654
ENSG00000278467	13.6668	0.0673853	0.992119	0.0679206	0.945849	0.977572
ENSG00000143756	1792.18	-0.215956	0.135248	-1.59674	0.110323	0.255512
ENSG00000236773	15.1359	0.572653	0.817655	0.70036	0.483702	0.688508
ENSG00000143753	4464.72	-0.0317622	0.179137	-0.177306	0.859268	0.934705
ENSG00000232628	16.2208	1.79911	1.20627	1.49146	0.13584	0.297627
ENSG00000143748	538.52	0.434287	0.172161	2.52257	0.0116502	0.043576
ENSG00000143771	1723.02	-1.00173	0.261191	-3.83523	0.000125447	0.000898063
ENSG00000162923	7618.93	-0.128107	0.152084	-0.842345	0.399595	0.61643
ENSG00000143786	384.502	-0.65493	0.636043	-1.0297	0.303153	0.515685
ENSG00000233384	24.811	0.313342	0.992959	0.315564	0.752333	0.875718
ENSG00000185842	42.763	0.844788	0.43858	1.92619	0.054081	0.149205
ENSG00000143815	3081.94	1.06075	0.175858	6.03184	1.62099e-09	3.24674e-08
ENSG00000154380	170.535	-1.4118	0.845754	-1.66929	0.0950608	0.228582
ENSG00000143742	3259.78	0.354898	0.257588	1.37778	0.168273	0.348272
ENSG00000143819	951.771	0.0539948	0.213985	0.252329	0.800787	0.903233
ENSG00000242861	47.6487	-0.305325	0.336266	-0.907986	0.363886	0.581354
ENSG00000196187	2001.54	0.111621	0.130139	0.857705	0.391055	0.608793
ENSG00000143811	753.429	-0.071196	0.15353	-0.463728	0.642843	0.806993
ENSG00000143751	893.753	-0.387149	0.108117	-3.58085	0.000342484	0.00216165
ENSG00000163041	5224.02	-0.0686324	0.163373	-0.420097	0.674415	0.828906
ENSG00000182827	1317.71	-0.000124301	0.249115	-0.000498971	0.999602	0.999844
ENSG00000183814	69.2713	0.282347	0.504074	0.56013	0.575391	0.757717
ENSG00000143799	4599.43	1.15055	0.153297	7.50538	6.12517e-14	2.38376e-12
ENSG00000203685	33.8627	0.971789	1.31105	0.741227	0.458556	0.668429
ENSG00000143772	1060.86	0.781044	0.461113	1.69383	0.0902985	0.220069
ENSG00000228382	3.70698	0.132512	2.14838	0.0616802	0.950817	0.980057
ENSG00000143801	1015.57	0.267427	0.326064	0.820168	0.412121	0.627639
ENSG00000163050	1491.02	-0.0111101	0.259659	-0.0427875	0.965871	0.986997
ENSG00000143776	940.679	0.324199	0.257819	1.25747	0.208584	0.401155
ENSG00000181450	107.812	0.546397	0.535466	1.02041	0.307532	0.521032
ENSG00000143740	511.389	-0.110606	0.230038	-0.480817	0.630647	0.79911
ENSG00000081692	122.938	0.309637	0.369216	0.838632	0.401676	0.618025
ENSG00000143816	4.32826	0.180176	1.20553	0.149458	0.881192	0.945264
ENSG00000276255	8.04952	0.658151	1.27385	0.516661	0.605393	0.780896
ENSG00000143761	15163.4	-0.378271	0.196092	-1.92905	0.053725	0.148505
ENSG00000143793	450.342	0.211231	0.207374	1.0186	0.308394	0.522046
ENSG00000162910	420.27	0.195958	0.235245	0.832995	0.404848	0.620858
ENSG00000143774	2894.39	-0.114697	0.239773	-0.478358	0.632395	0.800212
ENSG00000198835	4.56843	-2.349	1.30295	-1.80283	0.0714146	0.184728
ENSG00000181873	451.886	0.270017	0.193599	1.39472	0.1631	0.340448
ENSG00000154358	81.7251	-0.192678	0.43547	-0.442461	0.658156	0.817229
ENSG00000154370	1036.24	-0.81889	0.202425	-4.04539	5.22353e-05	0.000413561
ENSG00000231563	8.22167	-1.63091	0.968895	-1.68326	0.0923238	0.223849
ENSG00000162931	35.5138	-1.43456	0.373224	-3.8437	0.000121192	0.000872027
ENSG00000181218	92.1742	-1.43121	0.473739	-3.02109	0.00251865	0.0119789
ENSG00000196890	7.60957	-2.2038	1.20542	-1.82825	0.0675125	0.176899
ENSG00000168159	2164.83	0.260992	0.215713	1.20991	0.226315	0.424293
ENSG00000234975	1157.83	-2.3166	0.299237	-7.74167	9.81207e-15	4.28122e-13
ENSG00000116574	1897.54	-0.356281	0.350322	-1.01701	0.309149	0.522858
ENSG00000177788	11.3164	1.36134	0.791621	1.71969	0.0854892	0.211233
ENSG00000168118	1195.7	0.796758	0.196182	4.06133	4.87949e-05	0.000389278
ENSG00000237481	4.00486	2.94532	1.60946	1.83001	0.0672484	0.17644
ENSG00000154429	766.527	1.12641	0.33416	3.37087	0.000749299	0.00428242
ENSG00000069248	1211.6	0.202549	0.159511	1.26981	0.204153	0.395896
ENSG00000135776	641.843	0.665709	0.195778	3.40033	0.000673036	0.00390972
ENSG00000135801	1193.12	-0.10959	0.197111	-0.555982	0.578223	0.760105
ENSG00000135763	393.496	0.9715	0.229255	4.23764	2.25879e-05	0.000195646
ENSG00000143641	3913.43	-1.34639	0.252731	-5.32736	9.96487e-08	1.41704e-06
ENSG00000227006	6.7409	-2.13277	0.974062	-2.18956	0.0285561	0.0905331
ENSG00000177614	1670.28	2.38722	0.348282	6.85427	7.16756e-12	2.08744e-10
ENSG00000135775	1334.38	0.901354	0.223559	4.03183	5.53435e-05	0.000434006
ENSG00000135744	19.2429	2.71801	1.46626	1.85369	0.0637829	0.169056
ENSG00000119280	547.16	-0.175916	0.50987	-0.345022	0.730078	0.863841
ENSG00000143643	577.676	0.323102	0.245173	1.31785	0.187553	0.374444
ENSG00000173409	420.177	0.982321	0.195188	5.03269	4.83641e-07	6.08282e-06
ENSG00000182118	284.251	1.07761	0.320033	3.36719	0.000759391	0.00433509
ENSG00000119283	5.73021	0.0844019	2.01102	0.0419697	0.966523	0.987307
ENSG00000143633	360.753	-0.251195	0.224148	-1.12067	0.26243	0.468163
ENSG00000116906	1500.41	0.00858443	0.159539	0.0538077	0.957088	0.982177
ENSG00000116903	1166.12	-0.538383	0.212903	-2.52877	0.0114462	0.0429426
ENSG00000010072	493.448	-0.184236	0.208598	-0.883209	0.377123	0.594765
ENSG00000135766	1611.32	-0.0935625	0.215863	-0.433434	0.664699	0.822415
ENSG00000233461	44.9298	0.337667	0.448834	0.75232	0.451859	0.662046
ENSG00000116918	989.006	0.197106	0.255425	0.77168	0.440304	0.653136
ENSG00000162946	805.092	1.23215	0.269279	4.57573	4.74563e-06	4.78646e-05
ENSG00000116991	2983.05	0.144729	0.221655	0.652945	0.513792	0.711081
ENSG00000212916	65.3759	0.162771	0.409869	0.397129	0.691272	0.840417
ENSG00000135778	868.319	0.452011	0.292741	1.54407	0.122572	0.276132
ENSG00000135749	275.691	0.445737	0.424075	1.05108	0.293221	0.504641
ENSG00000143674	93.5108	0.408838	0.546313	0.748358	0.454244	0.664411
ENSG00000231663	10.2666	0.415257	0.96795	0.429007	0.667918	0.824862
ENSG00000168275	471.879	-0.13791	0.182613	-0.755204	0.450126	0.66077
ENSG00000059588	843.145	1.84035	0.356174	5.16701	2.37871e-07	3.16665e-06
ENSG00000168264	5864.36	-0.169133	0.17244	-0.980822	0.326681	0.542495
ENSG00000230628	4.70809	4.09196	2.33993	1.74875	0.0803346	0.201615
ENSG00000227630	74.0482	-0.569445	0.437973	-1.30018	0.193539	0.382202
ENSG00000237520	4.58154	-1.78075	1.34483	-1.32414	0.185457	0.372018
ENSG00000238005	80.0143	-0.775457	0.329567	-2.35296	0.0186248	0.0638855
ENSG00000258082	79.0248	-0.306822	0.335483	-0.914568	0.360419	0.578287
ENSG00000280587	6.65658	-0.0429194	1.41741	-0.0302802	0.975844	0.991256
ENSG00000173726	3402.5	0.625785	0.124794	5.01453	5.31632e-07	6.60672e-06
ENSG00000188739	15.5383	-0.935192	0.613909	-1.52334	0.127673	0.284653
ENSG00000054267	1519.81	-0.679254	0.442553	-1.53485	0.12482	0.27986
ENSG00000152904	716.793	-0.044747	0.209404	-0.213688	0.830791	0.919842
ENSG00000116957	602.567	0.39316	0.185674	2.11748	0.0342193	0.104349
ENSG00000162885	419.878	0.643895	0.278368	2.31311	0.0207169	0.0696405
ENSG00000143669	1339.95	0.424178	0.440495	0.962958	0.335569	0.55288
ENSG00000235674	3.71817	-0.590538	1.66153	-0.355419	0.722276	0.860295
ENSG00000116962	200.129	-3.00547	0.676614	-4.44193	8.91569e-06	8.46243e-05
ENSG00000077585	2071.31	-0.443647	0.248773	-1.78334	0.0745305	0.190557
ENSG00000086619	357.902	-0.730029	0.416846	-1.75131	0.0798918	0.20094
ENSG00000116977	1978.73	0.0525456	0.294375	0.178499	0.858331	0.934479
ENSG00000273058	6.62566	-0.166798	1.02883	-0.162124	0.871208	0.940888
ENSG00000230325	8.77259	0.286776	0.907543	0.315992	0.752009	0.875649
ENSG00000119285	970.004	1.26808	0.202949	6.24829	4.14962e-10	9.16387e-09
ENSG00000077522	52.111	-0.128546	1.19585	-0.107493	0.914398	0.963833
ENSG00000116984	1981.19	0.857148	0.196446	4.36328	1.28128e-05	0.000117204
ENSG00000237991	5.91723	-0.466894	1.26352	-0.369519	0.711741	0.853908
ENSG00000244020	17.9075	-5.20646	0.850475	-6.12182	9.25124e-10	1.94129e-08
ENSG00000133019	5.21263	-5.33025	1.51047	-3.52887	0.000417333	0.00257057
ENSG00000155816	6.44473	1.02144	2.19042	0.466322	0.640985	0.805572
ENSG00000228818	12.8292	-0.773515	0.920029	-0.84075	0.400488	0.617064
ENSG00000091483	1915.16	0.553753	0.146026	3.79214	0.000149355	0.00104855
ENSG00000117009	916.58	-2.93864	0.562812	-5.22134	1.77631e-07	2.41172e-06
ENSG00000054277	165.039	-1.69093	0.346838	-4.87526	1.08665e-06	1.26027e-05
ENSG00000203668	160.002	-0.0772797	0.632313	-0.122217	0.902727	0.957594
ENSG00000174371	115.14	1.58649	0.545094	2.9105	0.00360856	0.0162422
ENSG00000197769	330.836	-3.06122	0.543476	-5.63268	1.7743e-08	2.94858e-07
ENSG00000214837	30.5728	-0.592598	0.465491	-1.27306	0.202998	0.39431
ENSG00000143702	4550.53	-0.417567	0.41972	-0.99487	0.3198	0.534826
ENSG00000227230	9.65827	0.0591077	0.981321	0.0602328	0.95197	0.980543
ENSG00000054282	1872.1	-0.30859	0.230021	-1.34158	0.179733	0.363857
ENSG00000224727	11.9455	-0.474928	0.879248	-0.540152	0.589092	0.769339
ENSG00000265201	4.01104	-0.411731	1.22656	-0.335681	0.737112	0.867487
ENSG00000117020	555.052	-1.66682	0.420402	-3.96482	7.34512e-05	0.000558325
ENSG00000179456	1047.19	0.599975	0.311867	1.92382	0.0543773	0.149772
ENSG00000035687	1613.7	-0.133286	0.260558	-0.511541	0.608972	0.783575
ENSG00000179397	8.25706	-0.478423	0.980744	-0.487816	0.62568	0.795606
ENSG00000121644	1165.92	-0.106983	0.135235	-0.791087	0.428893	0.643145
[truncated: 17,875 more rows]
